# Supplementary material for: Statewide evaluation of COVID-19 vaccine hesitancy in Rhode Island
Source: PubMed Central journal article supplement (PMC9159551; doi:10.1371/journal.pone.0268587), 2022-06-01
Supplement: pone.0268587.s001.pdf [file pone.0268587.s001.pdf]

^ Collapse all instruments

| #                                                                                                                                                                                                                     | Variable / Field Name | Field Label<br><i>Field Note</i> | Field Attributes (Field Type, Validation, Choices, Calculations, etc.) |
|-----------------------------------------------------------------------------------------------------------------------------------------------------------------------------------------------------------------------|-----------------------|----------------------------------|------------------------------------------------------------------------|
| Instrument: <b>COVID-19 Testing Survey</b> (covid19_testing_survey)  Enabled as survey <span style="float: right;">^ Collapse</span> |                       |                                  |                                                                        |
| 1                                                                                                                                                                                                                     | record_id             | Record ID                        | text                                                                   |

|   |                  |                                                                                                                                                                                                                                                                                                                                                                                                                                                                                                                                                                                                                                                                                                                                                                                                                                                                                                                                                                                                                                                                                                                                                                                                                                                                                                                                                                                                                                                                                                                                                                                                                                                                                                                                                                                                                                                                                                                                                                                                                                                                                                                                                                                                                                                                                                                                                                                                                                                                                                                                                                                                                                                                                                                                                                                                                                                                                                                                                                                                                                                   |             |
|---|------------------|---------------------------------------------------------------------------------------------------------------------------------------------------------------------------------------------------------------------------------------------------------------------------------------------------------------------------------------------------------------------------------------------------------------------------------------------------------------------------------------------------------------------------------------------------------------------------------------------------------------------------------------------------------------------------------------------------------------------------------------------------------------------------------------------------------------------------------------------------------------------------------------------------------------------------------------------------------------------------------------------------------------------------------------------------------------------------------------------------------------------------------------------------------------------------------------------------------------------------------------------------------------------------------------------------------------------------------------------------------------------------------------------------------------------------------------------------------------------------------------------------------------------------------------------------------------------------------------------------------------------------------------------------------------------------------------------------------------------------------------------------------------------------------------------------------------------------------------------------------------------------------------------------------------------------------------------------------------------------------------------------------------------------------------------------------------------------------------------------------------------------------------------------------------------------------------------------------------------------------------------------------------------------------------------------------------------------------------------------------------------------------------------------------------------------------------------------------------------------------------------------------------------------------------------------------------------------------------------------------------------------------------------------------------------------------------------------------------------------------------------------------------------------------------------------------------------------------------------------------------------------------------------------------------------------------------------------------------------------------------------------------------------------------------------------|-------------|
| 2 | elements_consent | <p>Understanding COVID-19 Testing and Vaccination in Rhode Island</p> <p>We would like to ask you to take part in a research study called, Understanding COVID-19 Testing and Vaccination in Rhode Island.</p> <p>The goals of this study are to determine:</p> <ol style="list-style-type: none"> <li>1) how individuals in Rhode Island feel about different COVID-19 testing options</li> <li>2) the contributing factors that influence that decision, and</li> <li>3) willingness to be vaccinated against COVID-19 if a vaccine were eventually developed</li> </ol> <p>You are being asked to participate in this study because you reside in Rhode Island. Your responses will help us plan for COVID-19 testing in Rhode Island.</p> <p>We expect to conduct at least 1,000 online surveys.</p> <p>If you choose to participate in the study, you will be asked to complete an online survey. The survey is confidential. The survey asks you about your demographic information, how you feel about COVID-19 testing options, contributing factors that influence that decision, and willingness to be vaccinated against COVID-19 if a vaccine were eventually developed. The survey should take no longer than 10 minutes to complete.</p> <p>You will not be reimbursed for your participation in this research study.</p> <p>There are no costs to you for participating in this study.</p> <p>Your part in this research study consists of completing a survey. This study does not require you to have procedures or treatments. Therefore, being in this study does not involve any physical risks to you. However, there is a slight risk regarding the confidentiality of your participation in this study, if information about you becomes known to persons outside this study. The researchers are required to keep your study information confidential, however, so the risk of breach of confidentiality is very low.</p> <p>Study data will be shared only in a summary format. This ensures that none of the information you provide will be linked back to you.</p> <p>Your participation in this study may not benefit you personally. The indirect benefit is that the results of this study will help to inform the development of strategies for promoting COVID-19 testing. Therefore, the results of this study have the potential to inform public health strategies to contain COVID-19 including preferences for making testing (if it becomes available) vaccination accessible.</p> <p>Participation in this study is completely voluntary. You are not required to enroll or participate. If you decide to participate, you can always change your mind and quit at any time.</p> <p>If you have any questions about the research study, please feel free to contact Brooke G. Rogers, Ph.D., M.P.H., at 401-793-7077.</p> <p>If you have any questions about your rights as a research subject please feel free to call our Research Protections Office Director, Janice Muratori, at (401) 444-6246.</p> | descriptive |
|---|------------------|---------------------------------------------------------------------------------------------------------------------------------------------------------------------------------------------------------------------------------------------------------------------------------------------------------------------------------------------------------------------------------------------------------------------------------------------------------------------------------------------------------------------------------------------------------------------------------------------------------------------------------------------------------------------------------------------------------------------------------------------------------------------------------------------------------------------------------------------------------------------------------------------------------------------------------------------------------------------------------------------------------------------------------------------------------------------------------------------------------------------------------------------------------------------------------------------------------------------------------------------------------------------------------------------------------------------------------------------------------------------------------------------------------------------------------------------------------------------------------------------------------------------------------------------------------------------------------------------------------------------------------------------------------------------------------------------------------------------------------------------------------------------------------------------------------------------------------------------------------------------------------------------------------------------------------------------------------------------------------------------------------------------------------------------------------------------------------------------------------------------------------------------------------------------------------------------------------------------------------------------------------------------------------------------------------------------------------------------------------------------------------------------------------------------------------------------------------------------------------------------------------------------------------------------------------------------------------------------------------------------------------------------------------------------------------------------------------------------------------------------------------------------------------------------------------------------------------------------------------------------------------------------------------------------------------------------------------------------------------------------------------------------------------------------------|-------------|

|    |                                                                                            |                                                                                                                                                                                                                                                                                                                                                                                        |                                                                                                                                                                                                                                                                                                                                                                                                                                                                                                                                                                                       |   |                                  |       |                             |               |                           |   |                   |                                  |         |               |                   |   |                   |                                           |   |               |        |   |               |                   |
|----|--------------------------------------------------------------------------------------------|----------------------------------------------------------------------------------------------------------------------------------------------------------------------------------------------------------------------------------------------------------------------------------------------------------------------------------------------------------------------------------------|---------------------------------------------------------------------------------------------------------------------------------------------------------------------------------------------------------------------------------------------------------------------------------------------------------------------------------------------------------------------------------------------------------------------------------------------------------------------------------------------------------------------------------------------------------------------------------------|---|----------------------------------|-------|-----------------------------|---------------|---------------------------|---|-------------------|----------------------------------|---------|---------------|-------------------|---|-------------------|-------------------------------------------|---|---------------|--------|---|---------------|-------------------|
| 3  | agree_participate                                                                          | If you decide to participate in the study, you are agreeing to the components of the informed consent process. You can print a copy of this document for your records.                                                                                                                                                                                                                 | radio, Required<br><table border="1"> <tr> <td>0</td> <td>No, I do not want to participate</td> </tr> <tr> <td>1</td> <td>Yes, I agree to participate</td> </tr> </table><br>Custom alignment: LV<br>Stop actions on 0                                                                                                                                                                                                                                                                                                                                                                | 0 | No, I do not want to participate | 1     | Yes, I agree to participate |               |                           |   |                   |                                  |         |               |                   |   |                   |                                           |   |               |        |   |               |                   |
| 0  | No, I do not want to participate                                                           |                                                                                                                                                                                                                                                                                                                                                                                        |                                                                                                                                                                                                                                                                                                                                                                                                                                                                                                                                                                                       |   |                                  |       |                             |               |                           |   |                   |                                  |         |               |                   |   |                   |                                           |   |               |        |   |               |                   |
| 1  | Yes, I agree to participate                                                                |                                                                                                                                                                                                                                                                                                                                                                                        |                                                                                                                                                                                                                                                                                                                                                                                                                                                                                                                                                                                       |   |                                  |       |                             |               |                           |   |                   |                                  |         |               |                   |   |                   |                                           |   |               |        |   |               |                   |
| 4  | covid_age                                                                                  | Section Header: <i>Survey Progress: 0% The purpose of this survey is to help plan for COVID-19 testing and vaccination in Rhode Island. This survey is anonymous and will not be linked to you personally. Please answer each question. Demographics We are interested in your characteristics to better understand who COVID-19 is affecting in Rhode Island.</i><br>How old are you? | text (integer), Required                                                                                                                                                                                                                                                                                                                                                                                                                                                                                                                                                              |   |                                  |       |                             |               |                           |   |                   |                                  |         |               |                   |   |                   |                                           |   |               |        |   |               |                   |
| 5  | covid_sex_birth                                                                            | What was your sex assigned at birth?                                                                                                                                                                                                                                                                                                                                                   | radio, Required<br><table border="1"> <tr> <td>1</td> <td>Male</td> </tr> <tr> <td>2</td> <td>Female</td> </tr> <tr> <td>3</td> <td>Other:</td> </tr> </table>                                                                                                                                                                                                                                                                                                                                                                                                                        | 1 | Male                             | 2     | Female                      | 3             | Other:                    |   |                   |                                  |         |               |                   |   |                   |                                           |   |               |        |   |               |                   |
| 1  | Male                                                                                       |                                                                                                                                                                                                                                                                                                                                                                                        |                                                                                                                                                                                                                                                                                                                                                                                                                                                                                                                                                                                       |   |                                  |       |                             |               |                           |   |                   |                                  |         |               |                   |   |                   |                                           |   |               |        |   |               |                   |
| 2  | Female                                                                                     |                                                                                                                                                                                                                                                                                                                                                                                        |                                                                                                                                                                                                                                                                                                                                                                                                                                                                                                                                                                                       |   |                                  |       |                             |               |                           |   |                   |                                  |         |               |                   |   |                   |                                           |   |               |        |   |               |                   |
| 3  | Other:                                                                                     |                                                                                                                                                                                                                                                                                                                                                                                        |                                                                                                                                                                                                                                                                                                                                                                                                                                                                                                                                                                                       |   |                                  |       |                             |               |                           |   |                   |                                  |         |               |                   |   |                   |                                           |   |               |        |   |               |                   |
| 6  | covid_sex_birth_other<br>Show the field ONLY if: [covid_sex_birth] = '3'                   | Other (please specify):                                                                                                                                                                                                                                                                                                                                                                | text                                                                                                                                                                                                                                                                                                                                                                                                                                                                                                                                                                                  |   |                                  |       |                             |               |                           |   |                   |                                  |         |               |                   |   |                   |                                           |   |               |        |   |               |                   |
| 7  | covid_gender                                                                               | What is your current gender identity?                                                                                                                                                                                                                                                                                                                                                  | radio, Required<br><table border="1"> <tr> <td>1</td> <td>Man</td> </tr> <tr> <td>2</td> <td>Woman</td> </tr> <tr> <td>3</td> <td>Transgender man</td> </tr> <tr> <td>4</td> <td>Transgender woman</td> </tr> <tr> <td>5</td> <td>Other:</td> </tr> <tr> <td>6</td> <td>Decline to answer</td> </tr> </table>                                                                                                                                                                                                                                                                         | 1 | Man                              | 2     | Woman                       | 3             | Transgender man           | 4 | Transgender woman | 5                                | Other:  | 6             | Decline to answer |   |                   |                                           |   |               |        |   |               |                   |
| 1  | Man                                                                                        |                                                                                                                                                                                                                                                                                                                                                                                        |                                                                                                                                                                                                                                                                                                                                                                                                                                                                                                                                                                                       |   |                                  |       |                             |               |                           |   |                   |                                  |         |               |                   |   |                   |                                           |   |               |        |   |               |                   |
| 2  | Woman                                                                                      |                                                                                                                                                                                                                                                                                                                                                                                        |                                                                                                                                                                                                                                                                                                                                                                                                                                                                                                                                                                                       |   |                                  |       |                             |               |                           |   |                   |                                  |         |               |                   |   |                   |                                           |   |               |        |   |               |                   |
| 3  | Transgender man                                                                            |                                                                                                                                                                                                                                                                                                                                                                                        |                                                                                                                                                                                                                                                                                                                                                                                                                                                                                                                                                                                       |   |                                  |       |                             |               |                           |   |                   |                                  |         |               |                   |   |                   |                                           |   |               |        |   |               |                   |
| 4  | Transgender woman                                                                          |                                                                                                                                                                                                                                                                                                                                                                                        |                                                                                                                                                                                                                                                                                                                                                                                                                                                                                                                                                                                       |   |                                  |       |                             |               |                           |   |                   |                                  |         |               |                   |   |                   |                                           |   |               |        |   |               |                   |
| 5  | Other:                                                                                     |                                                                                                                                                                                                                                                                                                                                                                                        |                                                                                                                                                                                                                                                                                                                                                                                                                                                                                                                                                                                       |   |                                  |       |                             |               |                           |   |                   |                                  |         |               |                   |   |                   |                                           |   |               |        |   |               |                   |
| 6  | Decline to answer                                                                          |                                                                                                                                                                                                                                                                                                                                                                                        |                                                                                                                                                                                                                                                                                                                                                                                                                                                                                                                                                                                       |   |                                  |       |                             |               |                           |   |                   |                                  |         |               |                   |   |                   |                                           |   |               |        |   |               |                   |
| 8  | covid_gender_other<br>Show the field ONLY if: [covid_gender] = '5'                         | Other (please specify):                                                                                                                                                                                                                                                                                                                                                                | text                                                                                                                                                                                                                                                                                                                                                                                                                                                                                                                                                                                  |   |                                  |       |                             |               |                           |   |                   |                                  |         |               |                   |   |                   |                                           |   |               |        |   |               |                   |
| 9  | covid_sexual_orientation                                                                   | What is your sexual orientation?                                                                                                                                                                                                                                                                                                                                                       | radio, Required<br><table border="1"> <tr> <td>1</td> <td>Heterosexual</td> </tr> <tr> <td>2</td> <td>Bisexual</td> </tr> <tr> <td>3</td> <td>Lesbian/Gay</td> </tr> <tr> <td>4</td> <td>Pansexual</td> </tr> <tr> <td>5</td> <td>Asexual</td> </tr> <tr> <td>6</td> <td>Other:</td> </tr> <tr> <td>7</td> <td>Decline to answer</td> </tr> </table>                                                                                                                                                                                                                                  | 1 | Heterosexual                     | 2     | Bisexual                    | 3             | Lesbian/Gay               | 4 | Pansexual         | 5                                | Asexual | 6             | Other:            | 7 | Decline to answer |                                           |   |               |        |   |               |                   |
| 1  | Heterosexual                                                                               |                                                                                                                                                                                                                                                                                                                                                                                        |                                                                                                                                                                                                                                                                                                                                                                                                                                                                                                                                                                                       |   |                                  |       |                             |               |                           |   |                   |                                  |         |               |                   |   |                   |                                           |   |               |        |   |               |                   |
| 2  | Bisexual                                                                                   |                                                                                                                                                                                                                                                                                                                                                                                        |                                                                                                                                                                                                                                                                                                                                                                                                                                                                                                                                                                                       |   |                                  |       |                             |               |                           |   |                   |                                  |         |               |                   |   |                   |                                           |   |               |        |   |               |                   |
| 3  | Lesbian/Gay                                                                                |                                                                                                                                                                                                                                                                                                                                                                                        |                                                                                                                                                                                                                                                                                                                                                                                                                                                                                                                                                                                       |   |                                  |       |                             |               |                           |   |                   |                                  |         |               |                   |   |                   |                                           |   |               |        |   |               |                   |
| 4  | Pansexual                                                                                  |                                                                                                                                                                                                                                                                                                                                                                                        |                                                                                                                                                                                                                                                                                                                                                                                                                                                                                                                                                                                       |   |                                  |       |                             |               |                           |   |                   |                                  |         |               |                   |   |                   |                                           |   |               |        |   |               |                   |
| 5  | Asexual                                                                                    |                                                                                                                                                                                                                                                                                                                                                                                        |                                                                                                                                                                                                                                                                                                                                                                                                                                                                                                                                                                                       |   |                                  |       |                             |               |                           |   |                   |                                  |         |               |                   |   |                   |                                           |   |               |        |   |               |                   |
| 6  | Other:                                                                                     |                                                                                                                                                                                                                                                                                                                                                                                        |                                                                                                                                                                                                                                                                                                                                                                                                                                                                                                                                                                                       |   |                                  |       |                             |               |                           |   |                   |                                  |         |               |                   |   |                   |                                           |   |               |        |   |               |                   |
| 7  | Decline to answer                                                                          |                                                                                                                                                                                                                                                                                                                                                                                        |                                                                                                                                                                                                                                                                                                                                                                                                                                                                                                                                                                                       |   |                                  |       |                             |               |                           |   |                   |                                  |         |               |                   |   |                   |                                           |   |               |        |   |               |                   |
| 10 | covid_sexual_orientation_other<br>Show the field ONLY if: [covid_sexual_orientation] = '6' | Other (please specify):                                                                                                                                                                                                                                                                                                                                                                | text                                                                                                                                                                                                                                                                                                                                                                                                                                                                                                                                                                                  |   |                                  |       |                             |               |                           |   |                   |                                  |         |               |                   |   |                   |                                           |   |               |        |   |               |                   |
| 11 | covid_race                                                                                 | What is your race?                                                                                                                                                                                                                                                                                                                                                                     | checkbox, Required<br><table border="1"> <tr> <td>1</td> <td>covid_race__1</td> <td>White</td> </tr> <tr> <td>2</td> <td>covid_race__2</td> <td>Black or African American</td> </tr> <tr> <td>3</td> <td>covid_race__3</td> <td>American Indian or Alaska Native</td> </tr> <tr> <td>4</td> <td>covid_race__4</td> <td>Asian</td> </tr> <tr> <td>5</td> <td>covid_race__5</td> <td>Native Hawaiian or other Pacific Islander</td> </tr> <tr> <td>6</td> <td>covid_race__6</td> <td>Other:</td> </tr> <tr> <td>7</td> <td>covid_race__7</td> <td>Decline to answer</td> </tr> </table> | 1 | covid_race__1                    | White | 2                           | covid_race__2 | Black or African American | 3 | covid_race__3     | American Indian or Alaska Native | 4       | covid_race__4 | Asian             | 5 | covid_race__5     | Native Hawaiian or other Pacific Islander | 6 | covid_race__6 | Other: | 7 | covid_race__7 | Decline to answer |
| 1  | covid_race__1                                                                              | White                                                                                                                                                                                                                                                                                                                                                                                  |                                                                                                                                                                                                                                                                                                                                                                                                                                                                                                                                                                                       |   |                                  |       |                             |               |                           |   |                   |                                  |         |               |                   |   |                   |                                           |   |               |        |   |               |                   |
| 2  | covid_race__2                                                                              | Black or African American                                                                                                                                                                                                                                                                                                                                                              |                                                                                                                                                                                                                                                                                                                                                                                                                                                                                                                                                                                       |   |                                  |       |                             |               |                           |   |                   |                                  |         |               |                   |   |                   |                                           |   |               |        |   |               |                   |
| 3  | covid_race__3                                                                              | American Indian or Alaska Native                                                                                                                                                                                                                                                                                                                                                       |                                                                                                                                                                                                                                                                                                                                                                                                                                                                                                                                                                                       |   |                                  |       |                             |               |                           |   |                   |                                  |         |               |                   |   |                   |                                           |   |               |        |   |               |                   |
| 4  | covid_race__4                                                                              | Asian                                                                                                                                                                                                                                                                                                                                                                                  |                                                                                                                                                                                                                                                                                                                                                                                                                                                                                                                                                                                       |   |                                  |       |                             |               |                           |   |                   |                                  |         |               |                   |   |                   |                                           |   |               |        |   |               |                   |
| 5  | covid_race__5                                                                              | Native Hawaiian or other Pacific Islander                                                                                                                                                                                                                                                                                                                                              |                                                                                                                                                                                                                                                                                                                                                                                                                                                                                                                                                                                       |   |                                  |       |                             |               |                           |   |                   |                                  |         |               |                   |   |                   |                                           |   |               |        |   |               |                   |
| 6  | covid_race__6                                                                              | Other:                                                                                                                                                                                                                                                                                                                                                                                 |                                                                                                                                                                                                                                                                                                                                                                                                                                                                                                                                                                                       |   |                                  |       |                             |               |                           |   |                   |                                  |         |               |                   |   |                   |                                           |   |               |        |   |               |                   |
| 7  | covid_race__7                                                                              | Decline to answer                                                                                                                                                                                                                                                                                                                                                                      |                                                                                                                                                                                                                                                                                                                                                                                                                                                                                                                                                                                       |   |                                  |       |                             |               |                           |   |                   |                                  |         |               |                   |   |                   |                                           |   |               |        |   |               |                   |
| 12 | covid_race_other_2<br>Show the field ONLY if: [covid_race(6)] = '1'                        | Other (please specify):                                                                                                                                                                                                                                                                                                                                                                | text                                                                                                                                                                                                                                                                                                                                                                                                                                                                                                                                                                                  |   |                                  |       |                             |               |                           |   |                   |                                  |         |               |                   |   |                   |                                           |   |               |        |   |               |                   |

|    |                                                                                                                                                                                                          |                                                                                                                                                                                                                              |                                                                                                                                                                                                                                                                                                                                                                                                                                                                                                                                                                                                                                                                                                                                                                                                                       |   |                                       |   |                                                    |   |                                           |   |                                                      |   |                                                                                                |   |                   |   |                   |   |                   |   |                   |    |                    |    |                     |    |                     |    |                     |    |                     |    |                     |    |            |
|----|----------------------------------------------------------------------------------------------------------------------------------------------------------------------------------------------------------|------------------------------------------------------------------------------------------------------------------------------------------------------------------------------------------------------------------------------|-----------------------------------------------------------------------------------------------------------------------------------------------------------------------------------------------------------------------------------------------------------------------------------------------------------------------------------------------------------------------------------------------------------------------------------------------------------------------------------------------------------------------------------------------------------------------------------------------------------------------------------------------------------------------------------------------------------------------------------------------------------------------------------------------------------------------|---|---------------------------------------|---|----------------------------------------------------|---|-------------------------------------------|---|------------------------------------------------------|---|------------------------------------------------------------------------------------------------|---|-------------------|---|-------------------|---|-------------------|---|-------------------|----|--------------------|----|---------------------|----|---------------------|----|---------------------|----|---------------------|----|---------------------|----|------------|
| 13 | covid_ethnicity                                                                                                                                                                                          | Are you Hispanic/Latino?                                                                                                                                                                                                     | radio, Required<br><table border="1"> <tr><td>0</td><td>No</td></tr> <tr><td>1</td><td>Yes</td></tr> <tr><td>2</td><td>Decline to answer</td></tr> </table>                                                                                                                                                                                                                                                                                                                                                                                                                                                                                                                                                                                                                                                           | 0 | No                                    | 1 | Yes                                                | 2 | Decline to answer                         |   |                                                      |   |                                                                                                |   |                   |   |                   |   |                   |   |                   |    |                    |    |                     |    |                     |    |                     |    |                     |    |                     |    |            |
| 0  | No                                                                                                                                                                                                       |                                                                                                                                                                                                                              |                                                                                                                                                                                                                                                                                                                                                                                                                                                                                                                                                                                                                                                                                                                                                                                                                       |   |                                       |   |                                                    |   |                                           |   |                                                      |   |                                                                                                |   |                   |   |                   |   |                   |   |                   |    |                    |    |                     |    |                     |    |                     |    |                     |    |                     |    |            |
| 1  | Yes                                                                                                                                                                                                      |                                                                                                                                                                                                                              |                                                                                                                                                                                                                                                                                                                                                                                                                                                                                                                                                                                                                                                                                                                                                                                                                       |   |                                       |   |                                                    |   |                                           |   |                                                      |   |                                                                                                |   |                   |   |                   |   |                   |   |                   |    |                    |    |                     |    |                     |    |                     |    |                     |    |                     |    |            |
| 2  | Decline to answer                                                                                                                                                                                        |                                                                                                                                                                                                                              |                                                                                                                                                                                                                                                                                                                                                                                                                                                                                                                                                                                                                                                                                                                                                                                                                       |   |                                       |   |                                                    |   |                                           |   |                                                      |   |                                                                                                |   |                   |   |                   |   |                   |   |                   |    |                    |    |                     |    |                     |    |                     |    |                     |    |                     |    |            |
| 14 | covid_zip                                                                                                                                                                                                | What ZIP Code do you live in?                                                                                                                                                                                                | text (zipcode), Required                                                                                                                                                                                                                                                                                                                                                                                                                                                                                                                                                                                                                                                                                                                                                                                              |   |                                       |   |                                                    |   |                                           |   |                                                      |   |                                                                                                |   |                   |   |                   |   |                   |   |                   |    |                    |    |                     |    |                     |    |                     |    |                     |    |                     |    |            |
| 15 | covid_household                                                                                                                                                                                          | How many people including you live in your household?                                                                                                                                                                        | text (integer), Required                                                                                                                                                                                                                                                                                                                                                                                                                                                                                                                                                                                                                                                                                                                                                                                              |   |                                       |   |                                                    |   |                                           |   |                                                      |   |                                                                                                |   |                   |   |                   |   |                   |   |                   |    |                    |    |                     |    |                     |    |                     |    |                     |    |                     |    |            |
| 16 | covid_employment_status                                                                                                                                                                                  | What is your current employment status?                                                                                                                                                                                      | radio, Required<br><table border="1"> <tr><td>1</td><td>Full-time (30 or more hours per week)</td></tr> <tr><td>2</td><td>Part-time (fewer than 30 hours per week)</td></tr> <tr><td>3</td><td>Unemployed</td></tr> <tr><td>4</td><td>Retired</td></tr> <tr><td>5</td><td>Disabled, not able to work</td></tr> <tr><td>6</td><td>Student</td></tr> <tr><td>7</td><td>Other:</td></tr> </table>                                                                                                                                                                                                                                                                                                                                                                                                                        | 1 | Full-time (30 or more hours per week) | 2 | Part-time (fewer than 30 hours per week)           | 3 | Unemployed                                | 4 | Retired                                              | 5 | Disabled, not able to work                                                                     | 6 | Student           | 7 | Other:            |   |                   |   |                   |    |                    |    |                     |    |                     |    |                     |    |                     |    |                     |    |            |
| 1  | Full-time (30 or more hours per week)                                                                                                                                                                    |                                                                                                                                                                                                                              |                                                                                                                                                                                                                                                                                                                                                                                                                                                                                                                                                                                                                                                                                                                                                                                                                       |   |                                       |   |                                                    |   |                                           |   |                                                      |   |                                                                                                |   |                   |   |                   |   |                   |   |                   |    |                    |    |                     |    |                     |    |                     |    |                     |    |                     |    |            |
| 2  | Part-time (fewer than 30 hours per week)                                                                                                                                                                 |                                                                                                                                                                                                                              |                                                                                                                                                                                                                                                                                                                                                                                                                                                                                                                                                                                                                                                                                                                                                                                                                       |   |                                       |   |                                                    |   |                                           |   |                                                      |   |                                                                                                |   |                   |   |                   |   |                   |   |                   |    |                    |    |                     |    |                     |    |                     |    |                     |    |                     |    |            |
| 3  | Unemployed                                                                                                                                                                                               |                                                                                                                                                                                                                              |                                                                                                                                                                                                                                                                                                                                                                                                                                                                                                                                                                                                                                                                                                                                                                                                                       |   |                                       |   |                                                    |   |                                           |   |                                                      |   |                                                                                                |   |                   |   |                   |   |                   |   |                   |    |                    |    |                     |    |                     |    |                     |    |                     |    |                     |    |            |
| 4  | Retired                                                                                                                                                                                                  |                                                                                                                                                                                                                              |                                                                                                                                                                                                                                                                                                                                                                                                                                                                                                                                                                                                                                                                                                                                                                                                                       |   |                                       |   |                                                    |   |                                           |   |                                                      |   |                                                                                                |   |                   |   |                   |   |                   |   |                   |    |                    |    |                     |    |                     |    |                     |    |                     |    |                     |    |            |
| 5  | Disabled, not able to work                                                                                                                                                                               |                                                                                                                                                                                                                              |                                                                                                                                                                                                                                                                                                                                                                                                                                                                                                                                                                                                                                                                                                                                                                                                                       |   |                                       |   |                                                    |   |                                           |   |                                                      |   |                                                                                                |   |                   |   |                   |   |                   |   |                   |    |                    |    |                     |    |                     |    |                     |    |                     |    |                     |    |            |
| 6  | Student                                                                                                                                                                                                  |                                                                                                                                                                                                                              |                                                                                                                                                                                                                                                                                                                                                                                                                                                                                                                                                                                                                                                                                                                                                                                                                       |   |                                       |   |                                                    |   |                                           |   |                                                      |   |                                                                                                |   |                   |   |                   |   |                   |   |                   |    |                    |    |                     |    |                     |    |                     |    |                     |    |                     |    |            |
| 7  | Other:                                                                                                                                                                                                   |                                                                                                                                                                                                                              |                                                                                                                                                                                                                                                                                                                                                                                                                                                                                                                                                                                                                                                                                                                                                                                                                       |   |                                       |   |                                                    |   |                                           |   |                                                      |   |                                                                                                |   |                   |   |                   |   |                   |   |                   |    |                    |    |                     |    |                     |    |                     |    |                     |    |                     |    |            |
| 17 | covid_employment_status_other<br><br>Show the field ONLY if:<br>[covid_employment_status] = '7'                                                                                                          | Other (please specify):                                                                                                                                                                                                      | text                                                                                                                                                                                                                                                                                                                                                                                                                                                                                                                                                                                                                                                                                                                                                                                                                  |   |                                       |   |                                                    |   |                                           |   |                                                      |   |                                                                                                |   |                   |   |                   |   |                   |   |                   |    |                    |    |                     |    |                     |    |                     |    |                     |    |                     |    |            |
| 18 | covid_loss_employment                                                                                                                                                                                    | Was there a period of time you were not working due to COVID-19?<br><i>Since March 1, 2020</i>                                                                                                                               | radio, Required<br><table border="1"> <tr><td>1</td><td>No</td></tr> <tr><td>2</td><td>Yes, but I am now back at the job I had previously</td></tr> <tr><td>3</td><td>Yes, but I am now back at a different job</td></tr> <tr><td>4</td><td>Yes, I lost my previous job and now looking for work</td></tr> <tr><td>5</td><td>Yes, I was laid off my previous job, but plan to start back work at the same job in the future</td></tr> </table>                                                                                                                                                                                                                                                                                                                                                                        | 1 | No                                    | 2 | Yes, but I am now back at the job I had previously | 3 | Yes, but I am now back at a different job | 4 | Yes, I lost my previous job and now looking for work | 5 | Yes, I was laid off my previous job, but plan to start back work at the same job in the future |   |                   |   |                   |   |                   |   |                   |    |                    |    |                     |    |                     |    |                     |    |                     |    |                     |    |            |
| 1  | No                                                                                                                                                                                                       |                                                                                                                                                                                                                              |                                                                                                                                                                                                                                                                                                                                                                                                                                                                                                                                                                                                                                                                                                                                                                                                                       |   |                                       |   |                                                    |   |                                           |   |                                                      |   |                                                                                                |   |                   |   |                   |   |                   |   |                   |    |                    |    |                     |    |                     |    |                     |    |                     |    |                     |    |            |
| 2  | Yes, but I am now back at the job I had previously                                                                                                                                                       |                                                                                                                                                                                                                              |                                                                                                                                                                                                                                                                                                                                                                                                                                                                                                                                                                                                                                                                                                                                                                                                                       |   |                                       |   |                                                    |   |                                           |   |                                                      |   |                                                                                                |   |                   |   |                   |   |                   |   |                   |    |                    |    |                     |    |                     |    |                     |    |                     |    |                     |    |            |
| 3  | Yes, but I am now back at a different job                                                                                                                                                                |                                                                                                                                                                                                                              |                                                                                                                                                                                                                                                                                                                                                                                                                                                                                                                                                                                                                                                                                                                                                                                                                       |   |                                       |   |                                                    |   |                                           |   |                                                      |   |                                                                                                |   |                   |   |                   |   |                   |   |                   |    |                    |    |                     |    |                     |    |                     |    |                     |    |                     |    |            |
| 4  | Yes, I lost my previous job and now looking for work                                                                                                                                                     |                                                                                                                                                                                                                              |                                                                                                                                                                                                                                                                                                                                                                                                                                                                                                                                                                                                                                                                                                                                                                                                                       |   |                                       |   |                                                    |   |                                           |   |                                                      |   |                                                                                                |   |                   |   |                   |   |                   |   |                   |    |                    |    |                     |    |                     |    |                     |    |                     |    |                     |    |            |
| 5  | Yes, I was laid off my previous job, but plan to start back work at the same job in the future                                                                                                           |                                                                                                                                                                                                                              |                                                                                                                                                                                                                                                                                                                                                                                                                                                                                                                                                                                                                                                                                                                                                                                                                       |   |                                       |   |                                                    |   |                                           |   |                                                      |   |                                                                                                |   |                   |   |                   |   |                   |   |                   |    |                    |    |                     |    |                     |    |                     |    |                     |    |                     |    |            |
| 19 | covid_loss_employment_length<br><br>Show the field ONLY if:<br>[covid_loss_employment] = '2'<br>or [covid_loss_employment] = '3'<br>or [covid_loss_employment] = '4'<br>or [covid_loss_employment] = '5' | If yes, how long have you or had you been out of work due to COVID-19?<br>Number of weeks:<br><i>By out of work we mean not working. This does not include if you have been working remotely from home and getting paid.</i> | text (integer)                                                                                                                                                                                                                                                                                                                                                                                                                                                                                                                                                                                                                                                                                                                                                                                                        |   |                                       |   |                                                    |   |                                           |   |                                                      |   |                                                                                                |   |                   |   |                   |   |                   |   |                   |    |                    |    |                     |    |                     |    |                     |    |                     |    |                     |    |            |
| 20 | covid_income                                                                                                                                                                                             | This past year, what was your total personal income before taxes?                                                                                                                                                            | radio, Required<br><table border="1"> <tr><td>1</td><td>&lt; \$10,000</td></tr> <tr><td>2</td><td>\$10,001-\$20,000</td></tr> <tr><td>3</td><td>\$20,001-\$30,000</td></tr> <tr><td>4</td><td>\$30,001-\$40,000</td></tr> <tr><td>5</td><td>\$40,001-\$50,000</td></tr> <tr><td>6</td><td>\$50,001-\$60,000</td></tr> <tr><td>7</td><td>\$60,001-\$70,000</td></tr> <tr><td>8</td><td>\$70,001-\$80,000</td></tr> <tr><td>9</td><td>\$80,001-\$90,000</td></tr> <tr><td>10</td><td>\$90,001-\$100,000</td></tr> <tr><td>11</td><td>\$100,001-\$110,000</td></tr> <tr><td>12</td><td>\$110,001-\$120,000</td></tr> <tr><td>13</td><td>\$120,001-\$130,000</td></tr> <tr><td>14</td><td>\$130,001-\$140,000</td></tr> <tr><td>15</td><td>\$140,001-\$150,000</td></tr> <tr><td>16</td><td>\$150,001+</td></tr> </table> | 1 | < \$10,000                            | 2 | \$10,001-\$20,000                                  | 3 | \$20,001-\$30,000                         | 4 | \$30,001-\$40,000                                    | 5 | \$40,001-\$50,000                                                                              | 6 | \$50,001-\$60,000 | 7 | \$60,001-\$70,000 | 8 | \$70,001-\$80,000 | 9 | \$80,001-\$90,000 | 10 | \$90,001-\$100,000 | 11 | \$100,001-\$110,000 | 12 | \$110,001-\$120,000 | 13 | \$120,001-\$130,000 | 14 | \$130,001-\$140,000 | 15 | \$140,001-\$150,000 | 16 | \$150,001+ |
| 1  | < \$10,000                                                                                                                                                                                               |                                                                                                                                                                                                                              |                                                                                                                                                                                                                                                                                                                                                                                                                                                                                                                                                                                                                                                                                                                                                                                                                       |   |                                       |   |                                                    |   |                                           |   |                                                      |   |                                                                                                |   |                   |   |                   |   |                   |   |                   |    |                    |    |                     |    |                     |    |                     |    |                     |    |                     |    |            |
| 2  | \$10,001-\$20,000                                                                                                                                                                                        |                                                                                                                                                                                                                              |                                                                                                                                                                                                                                                                                                                                                                                                                                                                                                                                                                                                                                                                                                                                                                                                                       |   |                                       |   |                                                    |   |                                           |   |                                                      |   |                                                                                                |   |                   |   |                   |   |                   |   |                   |    |                    |    |                     |    |                     |    |                     |    |                     |    |                     |    |            |
| 3  | \$20,001-\$30,000                                                                                                                                                                                        |                                                                                                                                                                                                                              |                                                                                                                                                                                                                                                                                                                                                                                                                                                                                                                                                                                                                                                                                                                                                                                                                       |   |                                       |   |                                                    |   |                                           |   |                                                      |   |                                                                                                |   |                   |   |                   |   |                   |   |                   |    |                    |    |                     |    |                     |    |                     |    |                     |    |                     |    |            |
| 4  | \$30,001-\$40,000                                                                                                                                                                                        |                                                                                                                                                                                                                              |                                                                                                                                                                                                                                                                                                                                                                                                                                                                                                                                                                                                                                                                                                                                                                                                                       |   |                                       |   |                                                    |   |                                           |   |                                                      |   |                                                                                                |   |                   |   |                   |   |                   |   |                   |    |                    |    |                     |    |                     |    |                     |    |                     |    |                     |    |            |
| 5  | \$40,001-\$50,000                                                                                                                                                                                        |                                                                                                                                                                                                                              |                                                                                                                                                                                                                                                                                                                                                                                                                                                                                                                                                                                                                                                                                                                                                                                                                       |   |                                       |   |                                                    |   |                                           |   |                                                      |   |                                                                                                |   |                   |   |                   |   |                   |   |                   |    |                    |    |                     |    |                     |    |                     |    |                     |    |                     |    |            |
| 6  | \$50,001-\$60,000                                                                                                                                                                                        |                                                                                                                                                                                                                              |                                                                                                                                                                                                                                                                                                                                                                                                                                                                                                                                                                                                                                                                                                                                                                                                                       |   |                                       |   |                                                    |   |                                           |   |                                                      |   |                                                                                                |   |                   |   |                   |   |                   |   |                   |    |                    |    |                     |    |                     |    |                     |    |                     |    |                     |    |            |
| 7  | \$60,001-\$70,000                                                                                                                                                                                        |                                                                                                                                                                                                                              |                                                                                                                                                                                                                                                                                                                                                                                                                                                                                                                                                                                                                                                                                                                                                                                                                       |   |                                       |   |                                                    |   |                                           |   |                                                      |   |                                                                                                |   |                   |   |                   |   |                   |   |                   |    |                    |    |                     |    |                     |    |                     |    |                     |    |                     |    |            |
| 8  | \$70,001-\$80,000                                                                                                                                                                                        |                                                                                                                                                                                                                              |                                                                                                                                                                                                                                                                                                                                                                                                                                                                                                                                                                                                                                                                                                                                                                                                                       |   |                                       |   |                                                    |   |                                           |   |                                                      |   |                                                                                                |   |                   |   |                   |   |                   |   |                   |    |                    |    |                     |    |                     |    |                     |    |                     |    |                     |    |            |
| 9  | \$80,001-\$90,000                                                                                                                                                                                        |                                                                                                                                                                                                                              |                                                                                                                                                                                                                                                                                                                                                                                                                                                                                                                                                                                                                                                                                                                                                                                                                       |   |                                       |   |                                                    |   |                                           |   |                                                      |   |                                                                                                |   |                   |   |                   |   |                   |   |                   |    |                    |    |                     |    |                     |    |                     |    |                     |    |                     |    |            |
| 10 | \$90,001-\$100,000                                                                                                                                                                                       |                                                                                                                                                                                                                              |                                                                                                                                                                                                                                                                                                                                                                                                                                                                                                                                                                                                                                                                                                                                                                                                                       |   |                                       |   |                                                    |   |                                           |   |                                                      |   |                                                                                                |   |                   |   |                   |   |                   |   |                   |    |                    |    |                     |    |                     |    |                     |    |                     |    |                     |    |            |
| 11 | \$100,001-\$110,000                                                                                                                                                                                      |                                                                                                                                                                                                                              |                                                                                                                                                                                                                                                                                                                                                                                                                                                                                                                                                                                                                                                                                                                                                                                                                       |   |                                       |   |                                                    |   |                                           |   |                                                      |   |                                                                                                |   |                   |   |                   |   |                   |   |                   |    |                    |    |                     |    |                     |    |                     |    |                     |    |                     |    |            |
| 12 | \$110,001-\$120,000                                                                                                                                                                                      |                                                                                                                                                                                                                              |                                                                                                                                                                                                                                                                                                                                                                                                                                                                                                                                                                                                                                                                                                                                                                                                                       |   |                                       |   |                                                    |   |                                           |   |                                                      |   |                                                                                                |   |                   |   |                   |   |                   |   |                   |    |                    |    |                     |    |                     |    |                     |    |                     |    |                     |    |            |
| 13 | \$120,001-\$130,000                                                                                                                                                                                      |                                                                                                                                                                                                                              |                                                                                                                                                                                                                                                                                                                                                                                                                                                                                                                                                                                                                                                                                                                                                                                                                       |   |                                       |   |                                                    |   |                                           |   |                                                      |   |                                                                                                |   |                   |   |                   |   |                   |   |                   |    |                    |    |                     |    |                     |    |                     |    |                     |    |                     |    |            |
| 14 | \$130,001-\$140,000                                                                                                                                                                                      |                                                                                                                                                                                                                              |                                                                                                                                                                                                                                                                                                                                                                                                                                                                                                                                                                                                                                                                                                                                                                                                                       |   |                                       |   |                                                    |   |                                           |   |                                                      |   |                                                                                                |   |                   |   |                   |   |                   |   |                   |    |                    |    |                     |    |                     |    |                     |    |                     |    |                     |    |            |
| 15 | \$140,001-\$150,000                                                                                                                                                                                      |                                                                                                                                                                                                                              |                                                                                                                                                                                                                                                                                                                                                                                                                                                                                                                                                                                                                                                                                                                                                                                                                       |   |                                       |   |                                                    |   |                                           |   |                                                      |   |                                                                                                |   |                   |   |                   |   |                   |   |                   |    |                    |    |                     |    |                     |    |                     |    |                     |    |                     |    |            |
| 16 | \$150,001+                                                                                                                                                                                               |                                                                                                                                                                                                                              |                                                                                                                                                                                                                                                                                                                                                                                                                                                                                                                                                                                                                                                                                                                                                                                                                       |   |                                       |   |                                                    |   |                                           |   |                                                      |   |                                                                                                |   |                   |   |                   |   |                   |   |                   |    |                    |    |                     |    |                     |    |                     |    |                     |    |                     |    |            |

|                    |                                                                                                                                                    |                                                                                                                                                                                                                                                                                                  |                                                                                                                                                                                                                                                                                                                                                                                                                                                                                                                                                                                                                                                                                                                                                                                                                                                                                                                                                                                                                                     |                    |  |   |                                          |   |                                 |   |                                   |   |                                                               |   |                               |   |                                 |   |                                 |   |                                                                 |   |                  |    |                   |    |               |    |        |    |               |    |           |    |                                      |    |                       |    |                                   |    |             |    |        |
|--------------------|----------------------------------------------------------------------------------------------------------------------------------------------------|--------------------------------------------------------------------------------------------------------------------------------------------------------------------------------------------------------------------------------------------------------------------------------------------------|-------------------------------------------------------------------------------------------------------------------------------------------------------------------------------------------------------------------------------------------------------------------------------------------------------------------------------------------------------------------------------------------------------------------------------------------------------------------------------------------------------------------------------------------------------------------------------------------------------------------------------------------------------------------------------------------------------------------------------------------------------------------------------------------------------------------------------------------------------------------------------------------------------------------------------------------------------------------------------------------------------------------------------------|--------------------|--|---|------------------------------------------|---|---------------------------------|---|-----------------------------------|---|---------------------------------------------------------------|---|-------------------------------|---|---------------------------------|---|---------------------------------|---|-----------------------------------------------------------------|---|------------------|----|-------------------|----|---------------|----|--------|----|---------------|----|-----------|----|--------------------------------------|----|-----------------------|----|-----------------------------------|----|-------------|----|--------|
| 21                 | covid_job_setting                                                                                                                                  | What type of setting do/did you work in (select one)?                                                                                                                                                                                                                                            | <table border="1"> <tr><td colspan="2">radio, Required</td></tr> <tr><td>1</td><td>Healthcare</td></tr> <tr><td>2</td><td>Dental</td></tr> <tr><td>3</td><td>Childcare</td></tr> <tr><td>4</td><td>Congregate living (Nursing home, Assisted living, Group home)</td></tr> <tr><td>5</td><td>Faith-based organization</td></tr> <tr><td>6</td><td>Gym</td></tr> <tr><td>7</td><td>Hair</td></tr> <tr><td>8</td><td>Personal services (Nail / Massage / Tattoo / Facialist / Other)</td></tr> <tr><td>9</td><td>Physical therapy</td></tr> <tr><td>10</td><td>Restaurant or Bar</td></tr> <tr><td>11</td><td>Grocery store</td></tr> <tr><td>12</td><td>Retail</td></tr> <tr><td>13</td><td>Manufacturing</td></tr> <tr><td>14</td><td>Education</td></tr> <tr><td>15</td><td>Government (Inspectors, DMV, others)</td></tr> <tr><td>16</td><td>Public transportation</td></tr> <tr><td>17</td><td>First responder (Fire/EMS/Police)</td></tr> <tr><td>18</td><td>Corrections</td></tr> <tr><td>19</td><td>Other:</td></tr> </table> | radio, Required    |  | 1 | Healthcare                               | 2 | Dental                          | 3 | Childcare                         | 4 | Congregate living (Nursing home, Assisted living, Group home) | 5 | Faith-based organization      | 6 | Gym                             | 7 | Hair                            | 8 | Personal services (Nail / Massage / Tattoo / Facialist / Other) | 9 | Physical therapy | 10 | Restaurant or Bar | 11 | Grocery store | 12 | Retail | 13 | Manufacturing | 14 | Education | 15 | Government (Inspectors, DMV, others) | 16 | Public transportation | 17 | First responder (Fire/EMS/Police) | 18 | Corrections | 19 | Other: |
| radio, Required    |                                                                                                                                                    |                                                                                                                                                                                                                                                                                                  |                                                                                                                                                                                                                                                                                                                                                                                                                                                                                                                                                                                                                                                                                                                                                                                                                                                                                                                                                                                                                                     |                    |  |   |                                          |   |                                 |   |                                   |   |                                                               |   |                               |   |                                 |   |                                 |   |                                                                 |   |                  |    |                   |    |               |    |        |    |               |    |           |    |                                      |    |                       |    |                                   |    |             |    |        |
| 1                  | Healthcare                                                                                                                                         |                                                                                                                                                                                                                                                                                                  |                                                                                                                                                                                                                                                                                                                                                                                                                                                                                                                                                                                                                                                                                                                                                                                                                                                                                                                                                                                                                                     |                    |  |   |                                          |   |                                 |   |                                   |   |                                                               |   |                               |   |                                 |   |                                 |   |                                                                 |   |                  |    |                   |    |               |    |        |    |               |    |           |    |                                      |    |                       |    |                                   |    |             |    |        |
| 2                  | Dental                                                                                                                                             |                                                                                                                                                                                                                                                                                                  |                                                                                                                                                                                                                                                                                                                                                                                                                                                                                                                                                                                                                                                                                                                                                                                                                                                                                                                                                                                                                                     |                    |  |   |                                          |   |                                 |   |                                   |   |                                                               |   |                               |   |                                 |   |                                 |   |                                                                 |   |                  |    |                   |    |               |    |        |    |               |    |           |    |                                      |    |                       |    |                                   |    |             |    |        |
| 3                  | Childcare                                                                                                                                          |                                                                                                                                                                                                                                                                                                  |                                                                                                                                                                                                                                                                                                                                                                                                                                                                                                                                                                                                                                                                                                                                                                                                                                                                                                                                                                                                                                     |                    |  |   |                                          |   |                                 |   |                                   |   |                                                               |   |                               |   |                                 |   |                                 |   |                                                                 |   |                  |    |                   |    |               |    |        |    |               |    |           |    |                                      |    |                       |    |                                   |    |             |    |        |
| 4                  | Congregate living (Nursing home, Assisted living, Group home)                                                                                      |                                                                                                                                                                                                                                                                                                  |                                                                                                                                                                                                                                                                                                                                                                                                                                                                                                                                                                                                                                                                                                                                                                                                                                                                                                                                                                                                                                     |                    |  |   |                                          |   |                                 |   |                                   |   |                                                               |   |                               |   |                                 |   |                                 |   |                                                                 |   |                  |    |                   |    |               |    |        |    |               |    |           |    |                                      |    |                       |    |                                   |    |             |    |        |
| 5                  | Faith-based organization                                                                                                                           |                                                                                                                                                                                                                                                                                                  |                                                                                                                                                                                                                                                                                                                                                                                                                                                                                                                                                                                                                                                                                                                                                                                                                                                                                                                                                                                                                                     |                    |  |   |                                          |   |                                 |   |                                   |   |                                                               |   |                               |   |                                 |   |                                 |   |                                                                 |   |                  |    |                   |    |               |    |        |    |               |    |           |    |                                      |    |                       |    |                                   |    |             |    |        |
| 6                  | Gym                                                                                                                                                |                                                                                                                                                                                                                                                                                                  |                                                                                                                                                                                                                                                                                                                                                                                                                                                                                                                                                                                                                                                                                                                                                                                                                                                                                                                                                                                                                                     |                    |  |   |                                          |   |                                 |   |                                   |   |                                                               |   |                               |   |                                 |   |                                 |   |                                                                 |   |                  |    |                   |    |               |    |        |    |               |    |           |    |                                      |    |                       |    |                                   |    |             |    |        |
| 7                  | Hair                                                                                                                                               |                                                                                                                                                                                                                                                                                                  |                                                                                                                                                                                                                                                                                                                                                                                                                                                                                                                                                                                                                                                                                                                                                                                                                                                                                                                                                                                                                                     |                    |  |   |                                          |   |                                 |   |                                   |   |                                                               |   |                               |   |                                 |   |                                 |   |                                                                 |   |                  |    |                   |    |               |    |        |    |               |    |           |    |                                      |    |                       |    |                                   |    |             |    |        |
| 8                  | Personal services (Nail / Massage / Tattoo / Facialist / Other)                                                                                    |                                                                                                                                                                                                                                                                                                  |                                                                                                                                                                                                                                                                                                                                                                                                                                                                                                                                                                                                                                                                                                                                                                                                                                                                                                                                                                                                                                     |                    |  |   |                                          |   |                                 |   |                                   |   |                                                               |   |                               |   |                                 |   |                                 |   |                                                                 |   |                  |    |                   |    |               |    |        |    |               |    |           |    |                                      |    |                       |    |                                   |    |             |    |        |
| 9                  | Physical therapy                                                                                                                                   |                                                                                                                                                                                                                                                                                                  |                                                                                                                                                                                                                                                                                                                                                                                                                                                                                                                                                                                                                                                                                                                                                                                                                                                                                                                                                                                                                                     |                    |  |   |                                          |   |                                 |   |                                   |   |                                                               |   |                               |   |                                 |   |                                 |   |                                                                 |   |                  |    |                   |    |               |    |        |    |               |    |           |    |                                      |    |                       |    |                                   |    |             |    |        |
| 10                 | Restaurant or Bar                                                                                                                                  |                                                                                                                                                                                                                                                                                                  |                                                                                                                                                                                                                                                                                                                                                                                                                                                                                                                                                                                                                                                                                                                                                                                                                                                                                                                                                                                                                                     |                    |  |   |                                          |   |                                 |   |                                   |   |                                                               |   |                               |   |                                 |   |                                 |   |                                                                 |   |                  |    |                   |    |               |    |        |    |               |    |           |    |                                      |    |                       |    |                                   |    |             |    |        |
| 11                 | Grocery store                                                                                                                                      |                                                                                                                                                                                                                                                                                                  |                                                                                                                                                                                                                                                                                                                                                                                                                                                                                                                                                                                                                                                                                                                                                                                                                                                                                                                                                                                                                                     |                    |  |   |                                          |   |                                 |   |                                   |   |                                                               |   |                               |   |                                 |   |                                 |   |                                                                 |   |                  |    |                   |    |               |    |        |    |               |    |           |    |                                      |    |                       |    |                                   |    |             |    |        |
| 12                 | Retail                                                                                                                                             |                                                                                                                                                                                                                                                                                                  |                                                                                                                                                                                                                                                                                                                                                                                                                                                                                                                                                                                                                                                                                                                                                                                                                                                                                                                                                                                                                                     |                    |  |   |                                          |   |                                 |   |                                   |   |                                                               |   |                               |   |                                 |   |                                 |   |                                                                 |   |                  |    |                   |    |               |    |        |    |               |    |           |    |                                      |    |                       |    |                                   |    |             |    |        |
| 13                 | Manufacturing                                                                                                                                      |                                                                                                                                                                                                                                                                                                  |                                                                                                                                                                                                                                                                                                                                                                                                                                                                                                                                                                                                                                                                                                                                                                                                                                                                                                                                                                                                                                     |                    |  |   |                                          |   |                                 |   |                                   |   |                                                               |   |                               |   |                                 |   |                                 |   |                                                                 |   |                  |    |                   |    |               |    |        |    |               |    |           |    |                                      |    |                       |    |                                   |    |             |    |        |
| 14                 | Education                                                                                                                                          |                                                                                                                                                                                                                                                                                                  |                                                                                                                                                                                                                                                                                                                                                                                                                                                                                                                                                                                                                                                                                                                                                                                                                                                                                                                                                                                                                                     |                    |  |   |                                          |   |                                 |   |                                   |   |                                                               |   |                               |   |                                 |   |                                 |   |                                                                 |   |                  |    |                   |    |               |    |        |    |               |    |           |    |                                      |    |                       |    |                                   |    |             |    |        |
| 15                 | Government (Inspectors, DMV, others)                                                                                                               |                                                                                                                                                                                                                                                                                                  |                                                                                                                                                                                                                                                                                                                                                                                                                                                                                                                                                                                                                                                                                                                                                                                                                                                                                                                                                                                                                                     |                    |  |   |                                          |   |                                 |   |                                   |   |                                                               |   |                               |   |                                 |   |                                 |   |                                                                 |   |                  |    |                   |    |               |    |        |    |               |    |           |    |                                      |    |                       |    |                                   |    |             |    |        |
| 16                 | Public transportation                                                                                                                              |                                                                                                                                                                                                                                                                                                  |                                                                                                                                                                                                                                                                                                                                                                                                                                                                                                                                                                                                                                                                                                                                                                                                                                                                                                                                                                                                                                     |                    |  |   |                                          |   |                                 |   |                                   |   |                                                               |   |                               |   |                                 |   |                                 |   |                                                                 |   |                  |    |                   |    |               |    |        |    |               |    |           |    |                                      |    |                       |    |                                   |    |             |    |        |
| 17                 | First responder (Fire/EMS/Police)                                                                                                                  |                                                                                                                                                                                                                                                                                                  |                                                                                                                                                                                                                                                                                                                                                                                                                                                                                                                                                                                                                                                                                                                                                                                                                                                                                                                                                                                                                                     |                    |  |   |                                          |   |                                 |   |                                   |   |                                                               |   |                               |   |                                 |   |                                 |   |                                                                 |   |                  |    |                   |    |               |    |        |    |               |    |           |    |                                      |    |                       |    |                                   |    |             |    |        |
| 18                 | Corrections                                                                                                                                        |                                                                                                                                                                                                                                                                                                  |                                                                                                                                                                                                                                                                                                                                                                                                                                                                                                                                                                                                                                                                                                                                                                                                                                                                                                                                                                                                                                     |                    |  |   |                                          |   |                                 |   |                                   |   |                                                               |   |                               |   |                                 |   |                                 |   |                                                                 |   |                  |    |                   |    |               |    |        |    |               |    |           |    |                                      |    |                       |    |                                   |    |             |    |        |
| 19                 | Other:                                                                                                                                             |                                                                                                                                                                                                                                                                                                  |                                                                                                                                                                                                                                                                                                                                                                                                                                                                                                                                                                                                                                                                                                                                                                                                                                                                                                                                                                                                                                     |                    |  |   |                                          |   |                                 |   |                                   |   |                                                               |   |                               |   |                                 |   |                                 |   |                                                                 |   |                  |    |                   |    |               |    |        |    |               |    |           |    |                                      |    |                       |    |                                   |    |             |    |        |
| 22                 | covid_job_setting_other<br>Show the field ONLY if:<br>[covid_job_setting] = '19'                                                                   | Other (please specify):                                                                                                                                                                                                                                                                          | text                                                                                                                                                                                                                                                                                                                                                                                                                                                                                                                                                                                                                                                                                                                                                                                                                                                                                                                                                                                                                                |                    |  |   |                                          |   |                                 |   |                                   |   |                                                               |   |                               |   |                                 |   |                                 |   |                                                                 |   |                  |    |                   |    |               |    |        |    |               |    |           |    |                                      |    |                       |    |                                   |    |             |    |        |
| 23                 | covid_work_zip<br>Show the field ONLY if:<br>[covid_employment_status] = '1' or [covid_employment_status] = '2' or [covid_employment_status] = '7' | What ZIP Code do you work in?                                                                                                                                                                                                                                                                    | text (zipcode)                                                                                                                                                                                                                                                                                                                                                                                                                                                                                                                                                                                                                                                                                                                                                                                                                                                                                                                                                                                                                      |                    |  |   |                                          |   |                                 |   |                                   |   |                                                               |   |                               |   |                                 |   |                                 |   |                                                                 |   |                  |    |                   |    |               |    |        |    |               |    |           |    |                                      |    |                       |    |                                   |    |             |    |        |
| 24                 | covid_transportation                                                                                                                               | What modes of transportation do you use during a typical week (check all that apply)?                                                                                                                                                                                                            | <table border="1"> <tr><td colspan="2">checkbox, Required</td></tr> <tr><td>1</td><td>covid_transportation__1 Personal vehicle</td></tr> <tr><td>2</td><td>covid_transportation__2 Carpool</td></tr> <tr><td>3</td><td>covid_transportation__3 Rideshare</td></tr> <tr><td>4</td><td>covid_transportation__4 Bus</td></tr> <tr><td>5</td><td>covid_transportation__5 Train</td></tr> <tr><td>6</td><td>covid_transportation__6 Bicycle</td></tr> <tr><td>7</td><td>covid_transportation__7 Walking</td></tr> <tr><td>8</td><td>covid_transportation__8 Other:</td></tr> </table>                                                                                                                                                                                                                                                                                                                                                                                                                                                    | checkbox, Required |  | 1 | covid_transportation__1 Personal vehicle | 2 | covid_transportation__2 Carpool | 3 | covid_transportation__3 Rideshare | 4 | covid_transportation__4 Bus                                   | 5 | covid_transportation__5 Train | 6 | covid_transportation__6 Bicycle | 7 | covid_transportation__7 Walking | 8 | covid_transportation__8 Other:                                  |   |                  |    |                   |    |               |    |        |    |               |    |           |    |                                      |    |                       |    |                                   |    |             |    |        |
| checkbox, Required |                                                                                                                                                    |                                                                                                                                                                                                                                                                                                  |                                                                                                                                                                                                                                                                                                                                                                                                                                                                                                                                                                                                                                                                                                                                                                                                                                                                                                                                                                                                                                     |                    |  |   |                                          |   |                                 |   |                                   |   |                                                               |   |                               |   |                                 |   |                                 |   |                                                                 |   |                  |    |                   |    |               |    |        |    |               |    |           |    |                                      |    |                       |    |                                   |    |             |    |        |
| 1                  | covid_transportation__1 Personal vehicle                                                                                                           |                                                                                                                                                                                                                                                                                                  |                                                                                                                                                                                                                                                                                                                                                                                                                                                                                                                                                                                                                                                                                                                                                                                                                                                                                                                                                                                                                                     |                    |  |   |                                          |   |                                 |   |                                   |   |                                                               |   |                               |   |                                 |   |                                 |   |                                                                 |   |                  |    |                   |    |               |    |        |    |               |    |           |    |                                      |    |                       |    |                                   |    |             |    |        |
| 2                  | covid_transportation__2 Carpool                                                                                                                    |                                                                                                                                                                                                                                                                                                  |                                                                                                                                                                                                                                                                                                                                                                                                                                                                                                                                                                                                                                                                                                                                                                                                                                                                                                                                                                                                                                     |                    |  |   |                                          |   |                                 |   |                                   |   |                                                               |   |                               |   |                                 |   |                                 |   |                                                                 |   |                  |    |                   |    |               |    |        |    |               |    |           |    |                                      |    |                       |    |                                   |    |             |    |        |
| 3                  | covid_transportation__3 Rideshare                                                                                                                  |                                                                                                                                                                                                                                                                                                  |                                                                                                                                                                                                                                                                                                                                                                                                                                                                                                                                                                                                                                                                                                                                                                                                                                                                                                                                                                                                                                     |                    |  |   |                                          |   |                                 |   |                                   |   |                                                               |   |                               |   |                                 |   |                                 |   |                                                                 |   |                  |    |                   |    |               |    |        |    |               |    |           |    |                                      |    |                       |    |                                   |    |             |    |        |
| 4                  | covid_transportation__4 Bus                                                                                                                        |                                                                                                                                                                                                                                                                                                  |                                                                                                                                                                                                                                                                                                                                                                                                                                                                                                                                                                                                                                                                                                                                                                                                                                                                                                                                                                                                                                     |                    |  |   |                                          |   |                                 |   |                                   |   |                                                               |   |                               |   |                                 |   |                                 |   |                                                                 |   |                  |    |                   |    |               |    |        |    |               |    |           |    |                                      |    |                       |    |                                   |    |             |    |        |
| 5                  | covid_transportation__5 Train                                                                                                                      |                                                                                                                                                                                                                                                                                                  |                                                                                                                                                                                                                                                                                                                                                                                                                                                                                                                                                                                                                                                                                                                                                                                                                                                                                                                                                                                                                                     |                    |  |   |                                          |   |                                 |   |                                   |   |                                                               |   |                               |   |                                 |   |                                 |   |                                                                 |   |                  |    |                   |    |               |    |        |    |               |    |           |    |                                      |    |                       |    |                                   |    |             |    |        |
| 6                  | covid_transportation__6 Bicycle                                                                                                                    |                                                                                                                                                                                                                                                                                                  |                                                                                                                                                                                                                                                                                                                                                                                                                                                                                                                                                                                                                                                                                                                                                                                                                                                                                                                                                                                                                                     |                    |  |   |                                          |   |                                 |   |                                   |   |                                                               |   |                               |   |                                 |   |                                 |   |                                                                 |   |                  |    |                   |    |               |    |        |    |               |    |           |    |                                      |    |                       |    |                                   |    |             |    |        |
| 7                  | covid_transportation__7 Walking                                                                                                                    |                                                                                                                                                                                                                                                                                                  |                                                                                                                                                                                                                                                                                                                                                                                                                                                                                                                                                                                                                                                                                                                                                                                                                                                                                                                                                                                                                                     |                    |  |   |                                          |   |                                 |   |                                   |   |                                                               |   |                               |   |                                 |   |                                 |   |                                                                 |   |                  |    |                   |    |               |    |        |    |               |    |           |    |                                      |    |                       |    |                                   |    |             |    |        |
| 8                  | covid_transportation__8 Other:                                                                                                                     |                                                                                                                                                                                                                                                                                                  |                                                                                                                                                                                                                                                                                                                                                                                                                                                                                                                                                                                                                                                                                                                                                                                                                                                                                                                                                                                                                                     |                    |  |   |                                          |   |                                 |   |                                   |   |                                                               |   |                               |   |                                 |   |                                 |   |                                                                 |   |                  |    |                   |    |               |    |        |    |               |    |           |    |                                      |    |                       |    |                                   |    |             |    |        |
| 25                 | covid_transportation_other<br>Show the field ONLY if:<br>[covid_transportation(8)] = '1'                                                           | Other (please specify):                                                                                                                                                                                                                                                                          | text                                                                                                                                                                                                                                                                                                                                                                                                                                                                                                                                                                                                                                                                                                                                                                                                                                                                                                                                                                                                                                |                    |  |   |                                          |   |                                 |   |                                   |   |                                                               |   |                               |   |                                 |   |                                 |   |                                                                 |   |                  |    |                   |    |               |    |        |    |               |    |           |    |                                      |    |                       |    |                                   |    |             |    |        |
| 26                 | covid_country_travel                                                                                                                               | <p>Section Header: <i>Survey Progress: 0% Contact with COVID-19. We would like to know if you suspect you have had or had contact with someone who has been infected with SARS-CoV-2, the virus that causes COVID-19.</i></p> <p>Have you traveled out of the country since January 1, 2020?</p> | <table border="1"> <tr><td colspan="2">yesno, Required</td></tr> <tr><td>1</td><td>Yes</td></tr> <tr><td>0</td><td>No</td></tr> </table>                                                                                                                                                                                                                                                                                                                                                                                                                                                                                                                                                                                                                                                                                                                                                                                                                                                                                            | yesno, Required    |  | 1 | Yes                                      | 0 | No                              |   |                                   |   |                                                               |   |                               |   |                                 |   |                                 |   |                                                                 |   |                  |    |                   |    |               |    |        |    |               |    |           |    |                                      |    |                       |    |                                   |    |             |    |        |
| yesno, Required    |                                                                                                                                                    |                                                                                                                                                                                                                                                                                                  |                                                                                                                                                                                                                                                                                                                                                                                                                                                                                                                                                                                                                                                                                                                                                                                                                                                                                                                                                                                                                                     |                    |  |   |                                          |   |                                 |   |                                   |   |                                                               |   |                               |   |                                 |   |                                 |   |                                                                 |   |                  |    |                   |    |               |    |        |    |               |    |           |    |                                      |    |                       |    |                                   |    |             |    |        |
| 1                  | Yes                                                                                                                                                |                                                                                                                                                                                                                                                                                                  |                                                                                                                                                                                                                                                                                                                                                                                                                                                                                                                                                                                                                                                                                                                                                                                                                                                                                                                                                                                                                                     |                    |  |   |                                          |   |                                 |   |                                   |   |                                                               |   |                               |   |                                 |   |                                 |   |                                                                 |   |                  |    |                   |    |               |    |        |    |               |    |           |    |                                      |    |                       |    |                                   |    |             |    |        |
| 0                  | No                                                                                                                                                 |                                                                                                                                                                                                                                                                                                  |                                                                                                                                                                                                                                                                                                                                                                                                                                                                                                                                                                                                                                                                                                                                                                                                                                                                                                                                                                                                                                     |                    |  |   |                                          |   |                                 |   |                                   |   |                                                               |   |                               |   |                                 |   |                                 |   |                                                                 |   |                  |    |                   |    |               |    |        |    |               |    |           |    |                                      |    |                       |    |                                   |    |             |    |        |
| 27                 | covid_country_travel_yes<br>Show the field ONLY if:<br>[covid_country_travel] = '1'                                                                | If yes, location and date(s):                                                                                                                                                                                                                                                                    | notes                                                                                                                                                                                                                                                                                                                                                                                                                                                                                                                                                                                                                                                                                                                                                                                                                                                                                                                                                                                                                               |                    |  |   |                                          |   |                                 |   |                                   |   |                                                               |   |                               |   |                                 |   |                                 |   |                                                                 |   |                  |    |                   |    |               |    |        |    |               |    |           |    |                                      |    |                       |    |                                   |    |             |    |        |
| 28                 | covid_state_travel                                                                                                                                 | Have you traveled outside of the state since January 1, 2020?                                                                                                                                                                                                                                    | <table border="1"> <tr><td colspan="2">yesno, Required</td></tr> <tr><td>1</td><td>Yes</td></tr> <tr><td>0</td><td>No</td></tr> </table>                                                                                                                                                                                                                                                                                                                                                                                                                                                                                                                                                                                                                                                                                                                                                                                                                                                                                            | yesno, Required    |  | 1 | Yes                                      | 0 | No                              |   |                                   |   |                                                               |   |                               |   |                                 |   |                                 |   |                                                                 |   |                  |    |                   |    |               |    |        |    |               |    |           |    |                                      |    |                       |    |                                   |    |             |    |        |
| yesno, Required    |                                                                                                                                                    |                                                                                                                                                                                                                                                                                                  |                                                                                                                                                                                                                                                                                                                                                                                                                                                                                                                                                                                                                                                                                                                                                                                                                                                                                                                                                                                                                                     |                    |  |   |                                          |   |                                 |   |                                   |   |                                                               |   |                               |   |                                 |   |                                 |   |                                                                 |   |                  |    |                   |    |               |    |        |    |               |    |           |    |                                      |    |                       |    |                                   |    |             |    |        |
| 1                  | Yes                                                                                                                                                |                                                                                                                                                                                                                                                                                                  |                                                                                                                                                                                                                                                                                                                                                                                                                                                                                                                                                                                                                                                                                                                                                                                                                                                                                                                                                                                                                                     |                    |  |   |                                          |   |                                 |   |                                   |   |                                                               |   |                               |   |                                 |   |                                 |   |                                                                 |   |                  |    |                   |    |               |    |        |    |               |    |           |    |                                      |    |                       |    |                                   |    |             |    |        |
| 0                  | No                                                                                                                                                 |                                                                                                                                                                                                                                                                                                  |                                                                                                                                                                                                                                                                                                                                                                                                                                                                                                                                                                                                                                                                                                                                                                                                                                                                                                                                                                                                                                     |                    |  |   |                                          |   |                                 |   |                                   |   |                                                               |   |                               |   |                                 |   |                                 |   |                                                                 |   |                  |    |                   |    |               |    |        |    |               |    |           |    |                                      |    |                       |    |                                   |    |             |    |        |



|    |                                                                                            |                                                                                                                                                                                                                                                                                |                                                                                                                                                                                                                                                                                                                                                                                                                                                                                                                                                                                                                                                                                                                                                                                            |   |                                           |                                        |                    |                          |                                                    |   |                                  |            |                  |                          |                              |   |                          |                                        |   |                          |                          |   |                          |                         |   |                          |        |
|----|--------------------------------------------------------------------------------------------|--------------------------------------------------------------------------------------------------------------------------------------------------------------------------------------------------------------------------------------------------------------------------------|--------------------------------------------------------------------------------------------------------------------------------------------------------------------------------------------------------------------------------------------------------------------------------------------------------------------------------------------------------------------------------------------------------------------------------------------------------------------------------------------------------------------------------------------------------------------------------------------------------------------------------------------------------------------------------------------------------------------------------------------------------------------------------------------|---|-------------------------------------------|----------------------------------------|--------------------|--------------------------|----------------------------------------------------|---|----------------------------------|------------|------------------|--------------------------|------------------------------|---|--------------------------|----------------------------------------|---|--------------------------|--------------------------|---|--------------------------|-------------------------|---|--------------------------|--------|
| 41 | covid_likelihood                                                                           | How likely do you think it is that you've had COVID-19 in the past?                                                                                                                                                                                                            | radio, Required<br><table border="1"> <tr><td>1</td><td>Not at all likely</td></tr> <tr><td>2</td><td>Not likely</td></tr> <tr><td>3</td><td>Somewhat likely</td></tr> <tr><td>4</td><td>Likely</td></tr> <tr><td>5</td><td>Very likely</td></tr> </table>                                                                                                                                                                                                                                                                                                                                                                                                                                                                                                                                 | 1 | Not at all likely                         | 2                                      | Not likely         | 3                        | Somewhat likely                                    | 4 | Likely                           | 5          | Very likely      |                          |                              |   |                          |                                        |   |                          |                          |   |                          |                         |   |                          |        |
| 1  | Not at all likely                                                                          |                                                                                                                                                                                                                                                                                |                                                                                                                                                                                                                                                                                                                                                                                                                                                                                                                                                                                                                                                                                                                                                                                            |   |                                           |                                        |                    |                          |                                                    |   |                                  |            |                  |                          |                              |   |                          |                                        |   |                          |                          |   |                          |                         |   |                          |        |
| 2  | Not likely                                                                                 |                                                                                                                                                                                                                                                                                |                                                                                                                                                                                                                                                                                                                                                                                                                                                                                                                                                                                                                                                                                                                                                                                            |   |                                           |                                        |                    |                          |                                                    |   |                                  |            |                  |                          |                              |   |                          |                                        |   |                          |                          |   |                          |                         |   |                          |        |
| 3  | Somewhat likely                                                                            |                                                                                                                                                                                                                                                                                |                                                                                                                                                                                                                                                                                                                                                                                                                                                                                                                                                                                                                                                                                                                                                                                            |   |                                           |                                        |                    |                          |                                                    |   |                                  |            |                  |                          |                              |   |                          |                                        |   |                          |                          |   |                          |                         |   |                          |        |
| 4  | Likely                                                                                     |                                                                                                                                                                                                                                                                                |                                                                                                                                                                                                                                                                                                                                                                                                                                                                                                                                                                                                                                                                                                                                                                                            |   |                                           |                                        |                    |                          |                                                    |   |                                  |            |                  |                          |                              |   |                          |                                        |   |                          |                          |   |                          |                         |   |                          |        |
| 5  | Very likely                                                                                |                                                                                                                                                                                                                                                                                |                                                                                                                                                                                                                                                                                                                                                                                                                                                                                                                                                                                                                                                                                                                                                                                            |   |                                           |                                        |                    |                          |                                                    |   |                                  |            |                  |                          |                              |   |                          |                                        |   |                          |                          |   |                          |                         |   |                          |        |
| 42 | covid_offered_pcr                                                                          | Section Header: <i>Survey Progress: 0% COVID-19 Testing We would like to know what you think about testing for SARS-CoV-2, the virus that causes COVID-19.</i><br>Have you previously had a swab test of the nose for SARS-CoV-2?(i.e. either a nasal or nasopharyngeal swab)? | yesno, Required<br><table border="1"> <tr><td>1</td><td>Yes</td></tr> <tr><td>0</td><td>No</td></tr> </table>                                                                                                                                                                                                                                                                                                                                                                                                                                                                                                                                                                                                                                                                              | 1 | Yes                                       | 0                                      | No                 |                          |                                                    |   |                                  |            |                  |                          |                              |   |                          |                                        |   |                          |                          |   |                          |                         |   |                          |        |
| 1  | Yes                                                                                        |                                                                                                                                                                                                                                                                                |                                                                                                                                                                                                                                                                                                                                                                                                                                                                                                                                                                                                                                                                                                                                                                                            |   |                                           |                                        |                    |                          |                                                    |   |                                  |            |                  |                          |                              |   |                          |                                        |   |                          |                          |   |                          |                         |   |                          |        |
| 0  | No                                                                                         |                                                                                                                                                                                                                                                                                |                                                                                                                                                                                                                                                                                                                                                                                                                                                                                                                                                                                                                                                                                                                                                                                            |   |                                           |                                        |                    |                          |                                                    |   |                                  |            |                  |                          |                              |   |                          |                                        |   |                          |                          |   |                          |                         |   |                          |        |
| 43 | if_yes_how_many_times<br>Show the field ONLY if:<br>[covid_offered_pcr] = '1'              | IF YES, How many times?                                                                                                                                                                                                                                                        | text                                                                                                                                                                                                                                                                                                                                                                                                                                                                                                                                                                                                                                                                                                                                                                                       |   |                                           |                                        |                    |                          |                                                    |   |                                  |            |                  |                          |                              |   |                          |                                        |   |                          |                          |   |                          |                         |   |                          |        |
| 44 | where_were_you_tested<br>Show the field ONLY if:<br>[covid_offered_pcr] = '1'              | Where were you tested?                                                                                                                                                                                                                                                         | radio<br><table border="1"> <tr><td>1</td><td>Primary care provider or community clinic</td></tr> <tr><td>2</td><td>Urgent care center</td></tr> <tr><td>3</td><td>Emergency Department</td></tr> <tr><td>4</td><td>State-site through portal.ri.gov</td></tr> <tr><td>5</td><td>My place of work</td></tr> <tr><td>6</td><td>Other</td></tr> </table>                                                                                                                                                                                                                                                                                                                                                                                                                                     | 1 | Primary care provider or community clinic | 2                                      | Urgent care center | 3                        | Emergency Department                               | 4 | State-site through portal.ri.gov | 5          | My place of work | 6                        | Other                        |   |                          |                                        |   |                          |                          |   |                          |                         |   |                          |        |
| 1  | Primary care provider or community clinic                                                  |                                                                                                                                                                                                                                                                                |                                                                                                                                                                                                                                                                                                                                                                                                                                                                                                                                                                                                                                                                                                                                                                                            |   |                                           |                                        |                    |                          |                                                    |   |                                  |            |                  |                          |                              |   |                          |                                        |   |                          |                          |   |                          |                         |   |                          |        |
| 2  | Urgent care center                                                                         |                                                                                                                                                                                                                                                                                |                                                                                                                                                                                                                                                                                                                                                                                                                                                                                                                                                                                                                                                                                                                                                                                            |   |                                           |                                        |                    |                          |                                                    |   |                                  |            |                  |                          |                              |   |                          |                                        |   |                          |                          |   |                          |                         |   |                          |        |
| 3  | Emergency Department                                                                       |                                                                                                                                                                                                                                                                                |                                                                                                                                                                                                                                                                                                                                                                                                                                                                                                                                                                                                                                                                                                                                                                                            |   |                                           |                                        |                    |                          |                                                    |   |                                  |            |                  |                          |                              |   |                          |                                        |   |                          |                          |   |                          |                         |   |                          |        |
| 4  | State-site through portal.ri.gov                                                           |                                                                                                                                                                                                                                                                                |                                                                                                                                                                                                                                                                                                                                                                                                                                                                                                                                                                                                                                                                                                                                                                                            |   |                                           |                                        |                    |                          |                                                    |   |                                  |            |                  |                          |                              |   |                          |                                        |   |                          |                          |   |                          |                         |   |                          |        |
| 5  | My place of work                                                                           |                                                                                                                                                                                                                                                                                |                                                                                                                                                                                                                                                                                                                                                                                                                                                                                                                                                                                                                                                                                                                                                                                            |   |                                           |                                        |                    |                          |                                                    |   |                                  |            |                  |                          |                              |   |                          |                                        |   |                          |                          |   |                          |                         |   |                          |        |
| 6  | Other                                                                                      |                                                                                                                                                                                                                                                                                |                                                                                                                                                                                                                                                                                                                                                                                                                                                                                                                                                                                                                                                                                                                                                                                            |   |                                           |                                        |                    |                          |                                                    |   |                                  |            |                  |                          |                              |   |                          |                                        |   |                          |                          |   |                          |                         |   |                          |        |
| 45 | where_were_you_tested_other<br>Show the field ONLY if:<br>[where_were_you_tested] = '6'    | Please specify:                                                                                                                                                                                                                                                                | text                                                                                                                                                                                                                                                                                                                                                                                                                                                                                                                                                                                                                                                                                                                                                                                       |   |                                           |                                        |                    |                          |                                                    |   |                                  |            |                  |                          |                              |   |                          |                                        |   |                          |                          |   |                          |                         |   |                          |        |
| 46 | covid_pcr_results<br>Show the field ONLY if:<br>[covid_offered_pcr] = '1'                  | Have you every had a positive test?                                                                                                                                                                                                                                            | radio<br><table border="1"> <tr><td>0</td><td>No</td></tr> <tr><td>1</td><td>Yes</td></tr> </table>                                                                                                                                                                                                                                                                                                                                                                                                                                                                                                                                                                                                                                                                                        | 0 | No                                        | 1                                      | Yes                |                          |                                                    |   |                                  |            |                  |                          |                              |   |                          |                                        |   |                          |                          |   |                          |                         |   |                          |        |
| 0  | No                                                                                         |                                                                                                                                                                                                                                                                                |                                                                                                                                                                                                                                                                                                                                                                                                                                                                                                                                                                                                                                                                                                                                                                                            |   |                                           |                                        |                    |                          |                                                    |   |                                  |            |                  |                          |                              |   |                          |                                        |   |                          |                          |   |                          |                         |   |                          |        |
| 1  | Yes                                                                                        |                                                                                                                                                                                                                                                                                |                                                                                                                                                                                                                                                                                                                                                                                                                                                                                                                                                                                                                                                                                                                                                                                            |   |                                           |                                        |                    |                          |                                                    |   |                                  |            |                  |                          |                              |   |                          |                                        |   |                          |                          |   |                          |                         |   |                          |        |
| 47 | covid_pcr_likelihood                                                                       | If you were offered a swab test of your nose for SARS-CoV-2 today, how likely would you be to get one?                                                                                                                                                                         | radio, Required<br><table border="1"> <tr><td>1</td><td>Not at all likely</td></tr> <tr><td>2</td><td>Not likely</td></tr> <tr><td>3</td><td>Somewhat likely</td></tr> <tr><td>4</td><td>Likely</td></tr> <tr><td>5</td><td>Very likely</td></tr> </table>                                                                                                                                                                                                                                                                                                                                                                                                                                                                                                                                 | 1 | Not at all likely                         | 2                                      | Not likely         | 3                        | Somewhat likely                                    | 4 | Likely                           | 5          | Very likely      |                          |                              |   |                          |                                        |   |                          |                          |   |                          |                         |   |                          |        |
| 1  | Not at all likely                                                                          |                                                                                                                                                                                                                                                                                |                                                                                                                                                                                                                                                                                                                                                                                                                                                                                                                                                                                                                                                                                                                                                                                            |   |                                           |                                        |                    |                          |                                                    |   |                                  |            |                  |                          |                              |   |                          |                                        |   |                          |                          |   |                          |                         |   |                          |        |
| 2  | Not likely                                                                                 |                                                                                                                                                                                                                                                                                |                                                                                                                                                                                                                                                                                                                                                                                                                                                                                                                                                                                                                                                                                                                                                                                            |   |                                           |                                        |                    |                          |                                                    |   |                                  |            |                  |                          |                              |   |                          |                                        |   |                          |                          |   |                          |                         |   |                          |        |
| 3  | Somewhat likely                                                                            |                                                                                                                                                                                                                                                                                |                                                                                                                                                                                                                                                                                                                                                                                                                                                                                                                                                                                                                                                                                                                                                                                            |   |                                           |                                        |                    |                          |                                                    |   |                                  |            |                  |                          |                              |   |                          |                                        |   |                          |                          |   |                          |                         |   |                          |        |
| 4  | Likely                                                                                     |                                                                                                                                                                                                                                                                                |                                                                                                                                                                                                                                                                                                                                                                                                                                                                                                                                                                                                                                                                                                                                                                                            |   |                                           |                                        |                    |                          |                                                    |   |                                  |            |                  |                          |                              |   |                          |                                        |   |                          |                          |   |                          |                         |   |                          |        |
| 5  | Very likely                                                                                |                                                                                                                                                                                                                                                                                |                                                                                                                                                                                                                                                                                                                                                                                                                                                                                                                                                                                                                                                                                                                                                                                            |   |                                           |                                        |                    |                          |                                                    |   |                                  |            |                  |                          |                              |   |                          |                                        |   |                          |                          |   |                          |                         |   |                          |        |
| 48 | covid_pcr_reasons_yes                                                                      | What are some reasons you WOULD be willing to get tested? (check all that apply)                                                                                                                                                                                               | checkbox, Required<br><table border="1"> <tr><td>1</td><td>covid_pcr_reasons_yes__1</td><td>I would want to know for my own health</td></tr> <tr><td>2</td><td>covid_pcr_reasons_yes__2</td><td>I would want to know so I don't transmit to others</td></tr> <tr><td>3</td><td>covid_pcr_reasons_yes__3</td><td>It is free</td></tr> <tr><td>4</td><td>covid_pcr_reasons_yes__4</td><td>It does not take much effort</td></tr> <tr><td>5</td><td>covid_pcr_reasons_yes__5</td><td>It could inform public health measures</td></tr> <tr><td>6</td><td>covid_pcr_reasons_yes__6</td><td>It is required to travel</td></tr> <tr><td>7</td><td>covid_pcr_reasons_yes__7</td><td>It is required for work</td></tr> <tr><td>8</td><td>covid_pcr_reasons_yes__8</td><td>Other:</td></tr> </table> | 1 | covid_pcr_reasons_yes__1                  | I would want to know for my own health | 2                  | covid_pcr_reasons_yes__2 | I would want to know so I don't transmit to others | 3 | covid_pcr_reasons_yes__3         | It is free | 4                | covid_pcr_reasons_yes__4 | It does not take much effort | 5 | covid_pcr_reasons_yes__5 | It could inform public health measures | 6 | covid_pcr_reasons_yes__6 | It is required to travel | 7 | covid_pcr_reasons_yes__7 | It is required for work | 8 | covid_pcr_reasons_yes__8 | Other: |
| 1  | covid_pcr_reasons_yes__1                                                                   | I would want to know for my own health                                                                                                                                                                                                                                         |                                                                                                                                                                                                                                                                                                                                                                                                                                                                                                                                                                                                                                                                                                                                                                                            |   |                                           |                                        |                    |                          |                                                    |   |                                  |            |                  |                          |                              |   |                          |                                        |   |                          |                          |   |                          |                         |   |                          |        |
| 2  | covid_pcr_reasons_yes__2                                                                   | I would want to know so I don't transmit to others                                                                                                                                                                                                                             |                                                                                                                                                                                                                                                                                                                                                                                                                                                                                                                                                                                                                                                                                                                                                                                            |   |                                           |                                        |                    |                          |                                                    |   |                                  |            |                  |                          |                              |   |                          |                                        |   |                          |                          |   |                          |                         |   |                          |        |
| 3  | covid_pcr_reasons_yes__3                                                                   | It is free                                                                                                                                                                                                                                                                     |                                                                                                                                                                                                                                                                                                                                                                                                                                                                                                                                                                                                                                                                                                                                                                                            |   |                                           |                                        |                    |                          |                                                    |   |                                  |            |                  |                          |                              |   |                          |                                        |   |                          |                          |   |                          |                         |   |                          |        |
| 4  | covid_pcr_reasons_yes__4                                                                   | It does not take much effort                                                                                                                                                                                                                                                   |                                                                                                                                                                                                                                                                                                                                                                                                                                                                                                                                                                                                                                                                                                                                                                                            |   |                                           |                                        |                    |                          |                                                    |   |                                  |            |                  |                          |                              |   |                          |                                        |   |                          |                          |   |                          |                         |   |                          |        |
| 5  | covid_pcr_reasons_yes__5                                                                   | It could inform public health measures                                                                                                                                                                                                                                         |                                                                                                                                                                                                                                                                                                                                                                                                                                                                                                                                                                                                                                                                                                                                                                                            |   |                                           |                                        |                    |                          |                                                    |   |                                  |            |                  |                          |                              |   |                          |                                        |   |                          |                          |   |                          |                         |   |                          |        |
| 6  | covid_pcr_reasons_yes__6                                                                   | It is required to travel                                                                                                                                                                                                                                                       |                                                                                                                                                                                                                                                                                                                                                                                                                                                                                                                                                                                                                                                                                                                                                                                            |   |                                           |                                        |                    |                          |                                                    |   |                                  |            |                  |                          |                              |   |                          |                                        |   |                          |                          |   |                          |                         |   |                          |        |
| 7  | covid_pcr_reasons_yes__7                                                                   | It is required for work                                                                                                                                                                                                                                                        |                                                                                                                                                                                                                                                                                                                                                                                                                                                                                                                                                                                                                                                                                                                                                                                            |   |                                           |                                        |                    |                          |                                                    |   |                                  |            |                  |                          |                              |   |                          |                                        |   |                          |                          |   |                          |                         |   |                          |        |
| 8  | covid_pcr_reasons_yes__8                                                                   | Other:                                                                                                                                                                                                                                                                         |                                                                                                                                                                                                                                                                                                                                                                                                                                                                                                                                                                                                                                                                                                                                                                                            |   |                                           |                                        |                    |                          |                                                    |   |                                  |            |                  |                          |                              |   |                          |                                        |   |                          |                          |   |                          |                         |   |                          |        |
| 49 | covid_pcr_reasons_yes_other<br>Show the field ONLY if:<br>[covid_pcr_reasons_yes(8)] = '1' | Other (please specify):                                                                                                                                                                                                                                                        | text                                                                                                                                                                                                                                                                                                                                                                                                                                                                                                                                                                                                                                                                                                                                                                                       |   |                                           |                                        |                    |                          |                                                    |   |                                  |            |                  |                          |                              |   |                          |                                        |   |                          |                          |   |                          |                         |   |                          |        |

|    |                                                                                           |                                                                                       |                                                                                                                                                                                                                                                                                                                                                                                                                                                                                                                                                                                                                                                                                                                                                                                                                                                                                                                                                                                                                                                                                                                                                                                                                                                                                                                                                                                                                                                                                                                                                                                                                                                                                                                                                                         |   |                         |                                               |          |                         |                                            |   |                         |                       |   |                         |                                    |   |                         |                                    |   |                         |                                          |   |                         |                        |   |                         |                                   |   |                         |                                        |    |                          |                                   |    |                          |                                                   |    |                          |                                                                                |    |                          |                                             |    |                          |                                                               |    |                          |                       |    |                          |        |
|----|-------------------------------------------------------------------------------------------|---------------------------------------------------------------------------------------|-------------------------------------------------------------------------------------------------------------------------------------------------------------------------------------------------------------------------------------------------------------------------------------------------------------------------------------------------------------------------------------------------------------------------------------------------------------------------------------------------------------------------------------------------------------------------------------------------------------------------------------------------------------------------------------------------------------------------------------------------------------------------------------------------------------------------------------------------------------------------------------------------------------------------------------------------------------------------------------------------------------------------------------------------------------------------------------------------------------------------------------------------------------------------------------------------------------------------------------------------------------------------------------------------------------------------------------------------------------------------------------------------------------------------------------------------------------------------------------------------------------------------------------------------------------------------------------------------------------------------------------------------------------------------------------------------------------------------------------------------------------------------|---|-------------------------|-----------------------------------------------|----------|-------------------------|--------------------------------------------|---|-------------------------|-----------------------|---|-------------------------|------------------------------------|---|-------------------------|------------------------------------|---|-------------------------|------------------------------------------|---|-------------------------|------------------------|---|-------------------------|-----------------------------------|---|-------------------------|----------------------------------------|----|--------------------------|-----------------------------------|----|--------------------------|---------------------------------------------------|----|--------------------------|--------------------------------------------------------------------------------|----|--------------------------|---------------------------------------------|----|--------------------------|---------------------------------------------------------------|----|--------------------------|-----------------------|----|--------------------------|--------|
| 50 | covid_pcr_reasons_no<br><br>                                                              | What are some reasons you WOULD NOT be willing to get tested (check all that apply)?  | checkbox, Required<br><table border="1"> <tr> <td>1</td> <td>covid_pcr_reasons_no__1</td> <td>I am concerned the test will be uncomfortable</td> </tr> <tr> <td>2</td> <td>covid_pcr_reasons_no__2</td> <td>I am concerned about the costs of the test</td> </tr> <tr> <td>3</td> <td>covid_pcr_reasons_no__3</td> <td>I do not want to know</td> </tr> <tr> <td>4</td> <td>covid_pcr_reasons_no__4</td> <td>I do not think I have been exposed</td> </tr> <tr> <td>5</td> <td>covid_pcr_reasons_no__5</td> <td>I do not and have not had symptoms</td> </tr> <tr> <td>6</td> <td>covid_pcr_reasons_no__6</td> <td>I do not trust the accuracy of the tests</td> </tr> <tr> <td>7</td> <td>covid_pcr_reasons_no__7</td> <td>I already had COVID-19</td> </tr> <tr> <td>8</td> <td>covid_pcr_reasons_no__8</td> <td>I am not concerned about COVID-19</td> </tr> <tr> <td>9</td> <td>covid_pcr_reasons_no__9</td> <td>I do not have access to transportation</td> </tr> <tr> <td>10</td> <td>covid_pcr_reasons_no__10</td> <td>I do not have access to childcare</td> </tr> <tr> <td>11</td> <td>covid_pcr_reasons_no__11</td> <td>I have to work and I am unable to get off of work</td> </tr> <tr> <td>12</td> <td>covid_pcr_reasons_no__12</td> <td>I am concerned about the possibility of becoming infected when I go for a test</td> </tr> <tr> <td>13</td> <td>covid_pcr_reasons_no__13</td> <td>If I tested positive, people might judge me</td> </tr> <tr> <td>14</td> <td>covid_pcr_reasons_no__14</td> <td>If I tested positive, I would have to isolate/self-quarantine</td> </tr> <tr> <td>15</td> <td>covid_pcr_reasons_no__15</td> <td>I was recently tested</td> </tr> <tr> <td>16</td> <td>covid_pcr_reasons_no__16</td> <td>Other:</td> </tr> </table> | 1 | covid_pcr_reasons_no__1 | I am concerned the test will be uncomfortable | 2        | covid_pcr_reasons_no__2 | I am concerned about the costs of the test | 3 | covid_pcr_reasons_no__3 | I do not want to know | 4 | covid_pcr_reasons_no__4 | I do not think I have been exposed | 5 | covid_pcr_reasons_no__5 | I do not and have not had symptoms | 6 | covid_pcr_reasons_no__6 | I do not trust the accuracy of the tests | 7 | covid_pcr_reasons_no__7 | I already had COVID-19 | 8 | covid_pcr_reasons_no__8 | I am not concerned about COVID-19 | 9 | covid_pcr_reasons_no__9 | I do not have access to transportation | 10 | covid_pcr_reasons_no__10 | I do not have access to childcare | 11 | covid_pcr_reasons_no__11 | I have to work and I am unable to get off of work | 12 | covid_pcr_reasons_no__12 | I am concerned about the possibility of becoming infected when I go for a test | 13 | covid_pcr_reasons_no__13 | If I tested positive, people might judge me | 14 | covid_pcr_reasons_no__14 | If I tested positive, I would have to isolate/self-quarantine | 15 | covid_pcr_reasons_no__15 | I was recently tested | 16 | covid_pcr_reasons_no__16 | Other: |
| 1  | covid_pcr_reasons_no__1                                                                   | I am concerned the test will be uncomfortable                                         |                                                                                                                                                                                                                                                                                                                                                                                                                                                                                                                                                                                                                                                                                                                                                                                                                                                                                                                                                                                                                                                                                                                                                                                                                                                                                                                                                                                                                                                                                                                                                                                                                                                                                                                                                                         |   |                         |                                               |          |                         |                                            |   |                         |                       |   |                         |                                    |   |                         |                                    |   |                         |                                          |   |                         |                        |   |                         |                                   |   |                         |                                        |    |                          |                                   |    |                          |                                                   |    |                          |                                                                                |    |                          |                                             |    |                          |                                                               |    |                          |                       |    |                          |        |
| 2  | covid_pcr_reasons_no__2                                                                   | I am concerned about the costs of the test                                            |                                                                                                                                                                                                                                                                                                                                                                                                                                                                                                                                                                                                                                                                                                                                                                                                                                                                                                                                                                                                                                                                                                                                                                                                                                                                                                                                                                                                                                                                                                                                                                                                                                                                                                                                                                         |   |                         |                                               |          |                         |                                            |   |                         |                       |   |                         |                                    |   |                         |                                    |   |                         |                                          |   |                         |                        |   |                         |                                   |   |                         |                                        |    |                          |                                   |    |                          |                                                   |    |                          |                                                                                |    |                          |                                             |    |                          |                                                               |    |                          |                       |    |                          |        |
| 3  | covid_pcr_reasons_no__3                                                                   | I do not want to know                                                                 |                                                                                                                                                                                                                                                                                                                                                                                                                                                                                                                                                                                                                                                                                                                                                                                                                                                                                                                                                                                                                                                                                                                                                                                                                                                                                                                                                                                                                                                                                                                                                                                                                                                                                                                                                                         |   |                         |                                               |          |                         |                                            |   |                         |                       |   |                         |                                    |   |                         |                                    |   |                         |                                          |   |                         |                        |   |                         |                                   |   |                         |                                        |    |                          |                                   |    |                          |                                                   |    |                          |                                                                                |    |                          |                                             |    |                          |                                                               |    |                          |                       |    |                          |        |
| 4  | covid_pcr_reasons_no__4                                                                   | I do not think I have been exposed                                                    |                                                                                                                                                                                                                                                                                                                                                                                                                                                                                                                                                                                                                                                                                                                                                                                                                                                                                                                                                                                                                                                                                                                                                                                                                                                                                                                                                                                                                                                                                                                                                                                                                                                                                                                                                                         |   |                         |                                               |          |                         |                                            |   |                         |                       |   |                         |                                    |   |                         |                                    |   |                         |                                          |   |                         |                        |   |                         |                                   |   |                         |                                        |    |                          |                                   |    |                          |                                                   |    |                          |                                                                                |    |                          |                                             |    |                          |                                                               |    |                          |                       |    |                          |        |
| 5  | covid_pcr_reasons_no__5                                                                   | I do not and have not had symptoms                                                    |                                                                                                                                                                                                                                                                                                                                                                                                                                                                                                                                                                                                                                                                                                                                                                                                                                                                                                                                                                                                                                                                                                                                                                                                                                                                                                                                                                                                                                                                                                                                                                                                                                                                                                                                                                         |   |                         |                                               |          |                         |                                            |   |                         |                       |   |                         |                                    |   |                         |                                    |   |                         |                                          |   |                         |                        |   |                         |                                   |   |                         |                                        |    |                          |                                   |    |                          |                                                   |    |                          |                                                                                |    |                          |                                             |    |                          |                                                               |    |                          |                       |    |                          |        |
| 6  | covid_pcr_reasons_no__6                                                                   | I do not trust the accuracy of the tests                                              |                                                                                                                                                                                                                                                                                                                                                                                                                                                                                                                                                                                                                                                                                                                                                                                                                                                                                                                                                                                                                                                                                                                                                                                                                                                                                                                                                                                                                                                                                                                                                                                                                                                                                                                                                                         |   |                         |                                               |          |                         |                                            |   |                         |                       |   |                         |                                    |   |                         |                                    |   |                         |                                          |   |                         |                        |   |                         |                                   |   |                         |                                        |    |                          |                                   |    |                          |                                                   |    |                          |                                                                                |    |                          |                                             |    |                          |                                                               |    |                          |                       |    |                          |        |
| 7  | covid_pcr_reasons_no__7                                                                   | I already had COVID-19                                                                |                                                                                                                                                                                                                                                                                                                                                                                                                                                                                                                                                                                                                                                                                                                                                                                                                                                                                                                                                                                                                                                                                                                                                                                                                                                                                                                                                                                                                                                                                                                                                                                                                                                                                                                                                                         |   |                         |                                               |          |                         |                                            |   |                         |                       |   |                         |                                    |   |                         |                                    |   |                         |                                          |   |                         |                        |   |                         |                                   |   |                         |                                        |    |                          |                                   |    |                          |                                                   |    |                          |                                                                                |    |                          |                                             |    |                          |                                                               |    |                          |                       |    |                          |        |
| 8  | covid_pcr_reasons_no__8                                                                   | I am not concerned about COVID-19                                                     |                                                                                                                                                                                                                                                                                                                                                                                                                                                                                                                                                                                                                                                                                                                                                                                                                                                                                                                                                                                                                                                                                                                                                                                                                                                                                                                                                                                                                                                                                                                                                                                                                                                                                                                                                                         |   |                         |                                               |          |                         |                                            |   |                         |                       |   |                         |                                    |   |                         |                                    |   |                         |                                          |   |                         |                        |   |                         |                                   |   |                         |                                        |    |                          |                                   |    |                          |                                                   |    |                          |                                                                                |    |                          |                                             |    |                          |                                                               |    |                          |                       |    |                          |        |
| 9  | covid_pcr_reasons_no__9                                                                   | I do not have access to transportation                                                |                                                                                                                                                                                                                                                                                                                                                                                                                                                                                                                                                                                                                                                                                                                                                                                                                                                                                                                                                                                                                                                                                                                                                                                                                                                                                                                                                                                                                                                                                                                                                                                                                                                                                                                                                                         |   |                         |                                               |          |                         |                                            |   |                         |                       |   |                         |                                    |   |                         |                                    |   |                         |                                          |   |                         |                        |   |                         |                                   |   |                         |                                        |    |                          |                                   |    |                          |                                                   |    |                          |                                                                                |    |                          |                                             |    |                          |                                                               |    |                          |                       |    |                          |        |
| 10 | covid_pcr_reasons_no__10                                                                  | I do not have access to childcare                                                     |                                                                                                                                                                                                                                                                                                                                                                                                                                                                                                                                                                                                                                                                                                                                                                                                                                                                                                                                                                                                                                                                                                                                                                                                                                                                                                                                                                                                                                                                                                                                                                                                                                                                                                                                                                         |   |                         |                                               |          |                         |                                            |   |                         |                       |   |                         |                                    |   |                         |                                    |   |                         |                                          |   |                         |                        |   |                         |                                   |   |                         |                                        |    |                          |                                   |    |                          |                                                   |    |                          |                                                                                |    |                          |                                             |    |                          |                                                               |    |                          |                       |    |                          |        |
| 11 | covid_pcr_reasons_no__11                                                                  | I have to work and I am unable to get off of work                                     |                                                                                                                                                                                                                                                                                                                                                                                                                                                                                                                                                                                                                                                                                                                                                                                                                                                                                                                                                                                                                                                                                                                                                                                                                                                                                                                                                                                                                                                                                                                                                                                                                                                                                                                                                                         |   |                         |                                               |          |                         |                                            |   |                         |                       |   |                         |                                    |   |                         |                                    |   |                         |                                          |   |                         |                        |   |                         |                                   |   |                         |                                        |    |                          |                                   |    |                          |                                                   |    |                          |                                                                                |    |                          |                                             |    |                          |                                                               |    |                          |                       |    |                          |        |
| 12 | covid_pcr_reasons_no__12                                                                  | I am concerned about the possibility of becoming infected when I go for a test        |                                                                                                                                                                                                                                                                                                                                                                                                                                                                                                                                                                                                                                                                                                                                                                                                                                                                                                                                                                                                                                                                                                                                                                                                                                                                                                                                                                                                                                                                                                                                                                                                                                                                                                                                                                         |   |                         |                                               |          |                         |                                            |   |                         |                       |   |                         |                                    |   |                         |                                    |   |                         |                                          |   |                         |                        |   |                         |                                   |   |                         |                                        |    |                          |                                   |    |                          |                                                   |    |                          |                                                                                |    |                          |                                             |    |                          |                                                               |    |                          |                       |    |                          |        |
| 13 | covid_pcr_reasons_no__13                                                                  | If I tested positive, people might judge me                                           |                                                                                                                                                                                                                                                                                                                                                                                                                                                                                                                                                                                                                                                                                                                                                                                                                                                                                                                                                                                                                                                                                                                                                                                                                                                                                                                                                                                                                                                                                                                                                                                                                                                                                                                                                                         |   |                         |                                               |          |                         |                                            |   |                         |                       |   |                         |                                    |   |                         |                                    |   |                         |                                          |   |                         |                        |   |                         |                                   |   |                         |                                        |    |                          |                                   |    |                          |                                                   |    |                          |                                                                                |    |                          |                                             |    |                          |                                                               |    |                          |                       |    |                          |        |
| 14 | covid_pcr_reasons_no__14                                                                  | If I tested positive, I would have to isolate/self-quarantine                         |                                                                                                                                                                                                                                                                                                                                                                                                                                                                                                                                                                                                                                                                                                                                                                                                                                                                                                                                                                                                                                                                                                                                                                                                                                                                                                                                                                                                                                                                                                                                                                                                                                                                                                                                                                         |   |                         |                                               |          |                         |                                            |   |                         |                       |   |                         |                                    |   |                         |                                    |   |                         |                                          |   |                         |                        |   |                         |                                   |   |                         |                                        |    |                          |                                   |    |                          |                                                   |    |                          |                                                                                |    |                          |                                             |    |                          |                                                               |    |                          |                       |    |                          |        |
| 15 | covid_pcr_reasons_no__15                                                                  | I was recently tested                                                                 |                                                                                                                                                                                                                                                                                                                                                                                                                                                                                                                                                                                                                                                                                                                                                                                                                                                                                                                                                                                                                                                                                                                                                                                                                                                                                                                                                                                                                                                                                                                                                                                                                                                                                                                                                                         |   |                         |                                               |          |                         |                                            |   |                         |                       |   |                         |                                    |   |                         |                                    |   |                         |                                          |   |                         |                        |   |                         |                                   |   |                         |                                        |    |                          |                                   |    |                          |                                                   |    |                          |                                                                                |    |                          |                                             |    |                          |                                                               |    |                          |                       |    |                          |        |
| 16 | covid_pcr_reasons_no__16                                                                  | Other:                                                                                |                                                                                                                                                                                                                                                                                                                                                                                                                                                                                                                                                                                                                                                                                                                                                                                                                                                                                                                                                                                                                                                                                                                                                                                                                                                                                                                                                                                                                                                                                                                                                                                                                                                                                                                                                                         |   |                         |                                               |          |                         |                                            |   |                         |                       |   |                         |                                    |   |                         |                                    |   |                         |                                          |   |                         |                        |   |                         |                                   |   |                         |                                        |    |                          |                                   |    |                          |                                                   |    |                          |                                                                                |    |                          |                                             |    |                          |                                                               |    |                          |                       |    |                          |        |
| 51 | covid_pcr_reasons_no_other<br>Show the field ONLY if:<br>[covid_pcr_reasons_no(16)] = '1' | Other (please specify):                                                               | text                                                                                                                                                                                                                                                                                                                                                                                                                                                                                                                                                                                                                                                                                                                                                                                                                                                                                                                                                                                                                                                                                                                                                                                                                                                                                                                                                                                                                                                                                                                                                                                                                                                                                                                                                                    |   |                         |                                               |          |                         |                                            |   |                         |                       |   |                         |                                    |   |                         |                                    |   |                         |                                          |   |                         |                        |   |                         |                                   |   |                         |                                        |    |                          |                                   |    |                          |                                                   |    |                          |                                                                                |    |                          |                                             |    |                          |                                                               |    |                          |                       |    |                          |        |
| 52 | covid_offered_ab                                                                          | Have you previously had a blood test to see if you have the antibodies to SARS-CoV-2? | yesno, Required<br><table border="1"> <tr> <td>1</td> <td>Yes</td> </tr> <tr> <td>0</td> <td>No</td> </tr> </table>                                                                                                                                                                                                                                                                                                                                                                                                                                                                                                                                                                                                                                                                                                                                                                                                                                                                                                                                                                                                                                                                                                                                                                                                                                                                                                                                                                                                                                                                                                                                                                                                                                                     | 1 | Yes                     | 0                                             | No       |                         |                                            |   |                         |                       |   |                         |                                    |   |                         |                                    |   |                         |                                          |   |                         |                        |   |                         |                                   |   |                         |                                        |    |                          |                                   |    |                          |                                                   |    |                          |                                                                                |    |                          |                                             |    |                          |                                                               |    |                          |                       |    |                          |        |
| 1  | Yes                                                                                       |                                                                                       |                                                                                                                                                                                                                                                                                                                                                                                                                                                                                                                                                                                                                                                                                                                                                                                                                                                                                                                                                                                                                                                                                                                                                                                                                                                                                                                                                                                                                                                                                                                                                                                                                                                                                                                                                                         |   |                         |                                               |          |                         |                                            |   |                         |                       |   |                         |                                    |   |                         |                                    |   |                         |                                          |   |                         |                        |   |                         |                                   |   |                         |                                        |    |                          |                                   |    |                          |                                                   |    |                          |                                                                                |    |                          |                                             |    |                          |                                                               |    |                          |                       |    |                          |        |
| 0  | No                                                                                        |                                                                                       |                                                                                                                                                                                                                                                                                                                                                                                                                                                                                                                                                                                                                                                                                                                                                                                                                                                                                                                                                                                                                                                                                                                                                                                                                                                                                                                                                                                                                                                                                                                                                                                                                                                                                                                                                                         |   |                         |                                               |          |                         |                                            |   |                         |                       |   |                         |                                    |   |                         |                                    |   |                         |                                          |   |                         |                        |   |                         |                                   |   |                         |                                        |    |                          |                                   |    |                          |                                                   |    |                          |                                                                                |    |                          |                                             |    |                          |                                                               |    |                          |                       |    |                          |        |
| 53 | covid_ab_results<br>Show the field ONLY if:<br>[covid_offered_ab] = '1'                   | What were the results of this test?                                                   | radio<br><table border="1"> <tr> <td>1</td> <td>Negative</td> </tr> <tr> <td>2</td> <td>Positive</td> </tr> <tr> <td>3</td> <td>Inconclusive</td> </tr> <tr> <td>4</td> <td>Don't know</td> </tr> </table>                                                                                                                                                                                                                                                                                                                                                                                                                                                                                                                                                                                                                                                                                                                                                                                                                                                                                                                                                                                                                                                                                                                                                                                                                                                                                                                                                                                                                                                                                                                                                              | 1 | Negative                | 2                                             | Positive | 3                       | Inconclusive                               | 4 | Don't know              |                       |   |                         |                                    |   |                         |                                    |   |                         |                                          |   |                         |                        |   |                         |                                   |   |                         |                                        |    |                          |                                   |    |                          |                                                   |    |                          |                                                                                |    |                          |                                             |    |                          |                                                               |    |                          |                       |    |                          |        |
| 1  | Negative                                                                                  |                                                                                       |                                                                                                                                                                                                                                                                                                                                                                                                                                                                                                                                                                                                                                                                                                                                                                                                                                                                                                                                                                                                                                                                                                                                                                                                                                                                                                                                                                                                                                                                                                                                                                                                                                                                                                                                                                         |   |                         |                                               |          |                         |                                            |   |                         |                       |   |                         |                                    |   |                         |                                    |   |                         |                                          |   |                         |                        |   |                         |                                   |   |                         |                                        |    |                          |                                   |    |                          |                                                   |    |                          |                                                                                |    |                          |                                             |    |                          |                                                               |    |                          |                       |    |                          |        |
| 2  | Positive                                                                                  |                                                                                       |                                                                                                                                                                                                                                                                                                                                                                                                                                                                                                                                                                                                                                                                                                                                                                                                                                                                                                                                                                                                                                                                                                                                                                                                                                                                                                                                                                                                                                                                                                                                                                                                                                                                                                                                                                         |   |                         |                                               |          |                         |                                            |   |                         |                       |   |                         |                                    |   |                         |                                    |   |                         |                                          |   |                         |                        |   |                         |                                   |   |                         |                                        |    |                          |                                   |    |                          |                                                   |    |                          |                                                                                |    |                          |                                             |    |                          |                                                               |    |                          |                       |    |                          |        |
| 3  | Inconclusive                                                                              |                                                                                       |                                                                                                                                                                                                                                                                                                                                                                                                                                                                                                                                                                                                                                                                                                                                                                                                                                                                                                                                                                                                                                                                                                                                                                                                                                                                                                                                                                                                                                                                                                                                                                                                                                                                                                                                                                         |   |                         |                                               |          |                         |                                            |   |                         |                       |   |                         |                                    |   |                         |                                    |   |                         |                                          |   |                         |                        |   |                         |                                   |   |                         |                                        |    |                          |                                   |    |                          |                                                   |    |                          |                                                                                |    |                          |                                             |    |                          |                                                               |    |                          |                       |    |                          |        |
| 4  | Don't know                                                                                |                                                                                       |                                                                                                                                                                                                                                                                                                                                                                                                                                                                                                                                                                                                                                                                                                                                                                                                                                                                                                                                                                                                                                                                                                                                                                                                                                                                                                                                                                                                                                                                                                                                                                                                                                                                                                                                                                         |   |                         |                                               |          |                         |                                            |   |                         |                       |   |                         |                                    |   |                         |                                    |   |                         |                                          |   |                         |                        |   |                         |                                   |   |                         |                                        |    |                          |                                   |    |                          |                                                   |    |                          |                                                                                |    |                          |                                             |    |                          |                                                               |    |                          |                       |    |                          |        |



|    |                                                                                          |                                                                                                                         |                                                                                                                                                                                                                                                                                                                                                                                                                                                                                                                                                                                                                                                                                                                                                                                                                                                                                                                                                                                                                                                                                                                                                                                                   |   |                         |                                        |            |                         |                                                    |   |                         |            |             |                         |                              |   |                         |                                        |   |                         |        |
|----|------------------------------------------------------------------------------------------|-------------------------------------------------------------------------------------------------------------------------|---------------------------------------------------------------------------------------------------------------------------------------------------------------------------------------------------------------------------------------------------------------------------------------------------------------------------------------------------------------------------------------------------------------------------------------------------------------------------------------------------------------------------------------------------------------------------------------------------------------------------------------------------------------------------------------------------------------------------------------------------------------------------------------------------------------------------------------------------------------------------------------------------------------------------------------------------------------------------------------------------------------------------------------------------------------------------------------------------------------------------------------------------------------------------------------------------|---|-------------------------|----------------------------------------|------------|-------------------------|----------------------------------------------------|---|-------------------------|------------|-------------|-------------------------|------------------------------|---|-------------------------|----------------------------------------|---|-------------------------|--------|
| 54 | covid_ab_likelihood                                                                      | If you were offered a blood test to see if you have antibodies to SARS-CoV-2 today, how likely would you be to get one? | <p>radio, Required</p> <table border="1"> <tr> <td data-bbox="1044 111 1068 142">1</td> <td data-bbox="1068 111 1230 142">Not at all likely</td> </tr> <tr> <td data-bbox="1044 153 1068 184">2</td> <td data-bbox="1068 153 1230 184">Not likely</td> </tr> <tr> <td data-bbox="1044 195 1068 226">3</td> <td data-bbox="1068 195 1230 226">Somewhat likely</td> </tr> <tr> <td data-bbox="1044 237 1068 268">4</td> <td data-bbox="1068 237 1230 268">Likely</td> </tr> <tr> <td data-bbox="1044 279 1068 310">5</td> <td data-bbox="1068 279 1230 310">Very likely</td> </tr> </table>                                                                                                                                                                                                                                                                                                                                                                                                                                                                                                                                                                                                         | 1 | Not at all likely       | 2                                      | Not likely | 3                       | Somewhat likely                                    | 4 | Likely                  | 5          | Very likely |                         |                              |   |                         |                                        |   |                         |        |
| 1  | Not at all likely                                                                        |                                                                                                                         |                                                                                                                                                                                                                                                                                                                                                                                                                                                                                                                                                                                                                                                                                                                                                                                                                                                                                                                                                                                                                                                                                                                                                                                                   |   |                         |                                        |            |                         |                                                    |   |                         |            |             |                         |                              |   |                         |                                        |   |                         |        |
| 2  | Not likely                                                                               |                                                                                                                         |                                                                                                                                                                                                                                                                                                                                                                                                                                                                                                                                                                                                                                                                                                                                                                                                                                                                                                                                                                                                                                                                                                                                                                                                   |   |                         |                                        |            |                         |                                                    |   |                         |            |             |                         |                              |   |                         |                                        |   |                         |        |
| 3  | Somewhat likely                                                                          |                                                                                                                         |                                                                                                                                                                                                                                                                                                                                                                                                                                                                                                                                                                                                                                                                                                                                                                                                                                                                                                                                                                                                                                                                                                                                                                                                   |   |                         |                                        |            |                         |                                                    |   |                         |            |             |                         |                              |   |                         |                                        |   |                         |        |
| 4  | Likely                                                                                   |                                                                                                                         |                                                                                                                                                                                                                                                                                                                                                                                                                                                                                                                                                                                                                                                                                                                                                                                                                                                                                                                                                                                                                                                                                                                                                                                                   |   |                         |                                        |            |                         |                                                    |   |                         |            |             |                         |                              |   |                         |                                        |   |                         |        |
| 5  | Very likely                                                                              |                                                                                                                         |                                                                                                                                                                                                                                                                                                                                                                                                                                                                                                                                                                                                                                                                                                                                                                                                                                                                                                                                                                                                                                                                                                                                                                                                   |   |                         |                                        |            |                         |                                                    |   |                         |            |             |                         |                              |   |                         |                                        |   |                         |        |
| 55 | covid_ab_reasons_yes                                                                     | What are some reasons you WOULD be willing to get tested? (check all that apply)                                        | <p>checkbox, Required</p> <table border="1"> <tr> <td data-bbox="1044 352 1068 384">1</td> <td data-bbox="1068 352 1312 384">covid_ab_reasons_yes__1</td> <td data-bbox="1312 352 1524 384">I would want to know for my own health</td> </tr> <tr> <td data-bbox="1044 415 1068 447">2</td> <td data-bbox="1068 415 1312 447">covid_ab_reasons_yes__2</td> <td data-bbox="1312 415 1524 447">I would want to know so I don't transmit to others</td> </tr> <tr> <td data-bbox="1044 478 1068 510">3</td> <td data-bbox="1068 478 1312 510">covid_ab_reasons_yes__3</td> <td data-bbox="1312 478 1524 510">It is free</td> </tr> <tr> <td data-bbox="1044 541 1068 573">5</td> <td data-bbox="1068 541 1312 573">covid_ab_reasons_yes__5</td> <td data-bbox="1312 541 1524 573">It does not take much effort</td> </tr> <tr> <td data-bbox="1044 604 1068 636">6</td> <td data-bbox="1068 604 1312 636">covid_ab_reasons_yes__6</td> <td data-bbox="1312 604 1524 636">It could inform public health measures</td> </tr> <tr> <td data-bbox="1044 667 1068 699">7</td> <td data-bbox="1068 667 1312 699">covid_ab_reasons_yes__7</td> <td data-bbox="1312 667 1524 699">Other:</td> </tr> </table> | 1 | covid_ab_reasons_yes__1 | I would want to know for my own health | 2          | covid_ab_reasons_yes__2 | I would want to know so I don't transmit to others | 3 | covid_ab_reasons_yes__3 | It is free | 5           | covid_ab_reasons_yes__5 | It does not take much effort | 6 | covid_ab_reasons_yes__6 | It could inform public health measures | 7 | covid_ab_reasons_yes__7 | Other: |
| 1  | covid_ab_reasons_yes__1                                                                  | I would want to know for my own health                                                                                  |                                                                                                                                                                                                                                                                                                                                                                                                                                                                                                                                                                                                                                                                                                                                                                                                                                                                                                                                                                                                                                                                                                                                                                                                   |   |                         |                                        |            |                         |                                                    |   |                         |            |             |                         |                              |   |                         |                                        |   |                         |        |
| 2  | covid_ab_reasons_yes__2                                                                  | I would want to know so I don't transmit to others                                                                      |                                                                                                                                                                                                                                                                                                                                                                                                                                                                                                                                                                                                                                                                                                                                                                                                                                                                                                                                                                                                                                                                                                                                                                                                   |   |                         |                                        |            |                         |                                                    |   |                         |            |             |                         |                              |   |                         |                                        |   |                         |        |
| 3  | covid_ab_reasons_yes__3                                                                  | It is free                                                                                                              |                                                                                                                                                                                                                                                                                                                                                                                                                                                                                                                                                                                                                                                                                                                                                                                                                                                                                                                                                                                                                                                                                                                                                                                                   |   |                         |                                        |            |                         |                                                    |   |                         |            |             |                         |                              |   |                         |                                        |   |                         |        |
| 5  | covid_ab_reasons_yes__5                                                                  | It does not take much effort                                                                                            |                                                                                                                                                                                                                                                                                                                                                                                                                                                                                                                                                                                                                                                                                                                                                                                                                                                                                                                                                                                                                                                                                                                                                                                                   |   |                         |                                        |            |                         |                                                    |   |                         |            |             |                         |                              |   |                         |                                        |   |                         |        |
| 6  | covid_ab_reasons_yes__6                                                                  | It could inform public health measures                                                                                  |                                                                                                                                                                                                                                                                                                                                                                                                                                                                                                                                                                                                                                                                                                                                                                                                                                                                                                                                                                                                                                                                                                                                                                                                   |   |                         |                                        |            |                         |                                                    |   |                         |            |             |                         |                              |   |                         |                                        |   |                         |        |
| 7  | covid_ab_reasons_yes__7                                                                  | Other:                                                                                                                  |                                                                                                                                                                                                                                                                                                                                                                                                                                                                                                                                                                                                                                                                                                                                                                                                                                                                                                                                                                                                                                                                                                                                                                                                   |   |                         |                                        |            |                         |                                                    |   |                         |            |             |                         |                              |   |                         |                                        |   |                         |        |
| 56 | covid_ab_reasons_yes_other<br>Show the field ONLY if:<br>[covid_ab_reasons_yes(7)] = '1' | Other (please specify):                                                                                                 | text                                                                                                                                                                                                                                                                                                                                                                                                                                                                                                                                                                                                                                                                                                                                                                                                                                                                                                                                                                                                                                                                                                                                                                                              |   |                         |                                        |            |                         |                                                    |   |                         |            |             |                         |                              |   |                         |                                        |   |                         |        |

|    |                                                                                         |                                                                                                                                                                        |                                                                                                                                                                                                                                                                                                                                                                                                                                                                                                                                                                                                                                                                                                                                                                                                                                                                                                                                                                                                                                                                                                                                                                                                                                                                                                                                                                                                                                                                                                                                                                                                                                                                                                                                                                              |   |                        |                                         |                    |                        |                                            |   |                        |                       |                     |                        |                                    |   |                        |                                    |   |                        |                                          |   |                        |                        |   |                        |                                   |   |                        |                                        |    |                         |                                   |    |                         |                                                   |    |                         |                                                                                |    |                         |                                             |    |                         |                                                               |    |                         |                      |    |                         |        |
|----|-----------------------------------------------------------------------------------------|------------------------------------------------------------------------------------------------------------------------------------------------------------------------|------------------------------------------------------------------------------------------------------------------------------------------------------------------------------------------------------------------------------------------------------------------------------------------------------------------------------------------------------------------------------------------------------------------------------------------------------------------------------------------------------------------------------------------------------------------------------------------------------------------------------------------------------------------------------------------------------------------------------------------------------------------------------------------------------------------------------------------------------------------------------------------------------------------------------------------------------------------------------------------------------------------------------------------------------------------------------------------------------------------------------------------------------------------------------------------------------------------------------------------------------------------------------------------------------------------------------------------------------------------------------------------------------------------------------------------------------------------------------------------------------------------------------------------------------------------------------------------------------------------------------------------------------------------------------------------------------------------------------------------------------------------------------|---|------------------------|-----------------------------------------|--------------------|------------------------|--------------------------------------------|---|------------------------|-----------------------|---------------------|------------------------|------------------------------------|---|------------------------|------------------------------------|---|------------------------|------------------------------------------|---|------------------------|------------------------|---|------------------------|-----------------------------------|---|------------------------|----------------------------------------|----|-------------------------|-----------------------------------|----|-------------------------|---------------------------------------------------|----|-------------------------|--------------------------------------------------------------------------------|----|-------------------------|---------------------------------------------|----|-------------------------|---------------------------------------------------------------|----|-------------------------|----------------------|----|-------------------------|--------|
| 57 | covid_ab_reasons_no                                                                     | What are some reasons you WOULD NOT be willing to get tested? (check all that apply)                                                                                   | checkbox, Required <table border="1" data-bbox="1044 111 1523 1304"> <tr> <td>1</td> <td>covid_ab_reasons_no__1</td> <td>I am concerned the test will be painful</td> </tr> <tr> <td>2</td> <td>covid_ab_reasons_no__2</td> <td>I am concerned about the costs of the test</td> </tr> <tr> <td>3</td> <td>covid_ab_reasons_no__3</td> <td>I do not want to know</td> </tr> <tr> <td>4</td> <td>covid_ab_reasons_no__4</td> <td>I do not think I have been exposed</td> </tr> <tr> <td>5</td> <td>covid_ab_reasons_no__5</td> <td>I do not and have not had symptoms</td> </tr> <tr> <td>6</td> <td>covid_ab_reasons_no__6</td> <td>I do not trust the accuracy of the tests</td> </tr> <tr> <td>7</td> <td>covid_ab_reasons_no__7</td> <td>I already had COVID-19</td> </tr> <tr> <td>8</td> <td>covid_ab_reasons_no__8</td> <td>I am not concerned about COVID-19</td> </tr> <tr> <td>9</td> <td>covid_ab_reasons_no__9</td> <td>I do not have access to transportation</td> </tr> <tr> <td>10</td> <td>covid_ab_reasons_no__10</td> <td>I do not have access to childcare</td> </tr> <tr> <td>11</td> <td>covid_ab_reasons_no__11</td> <td>I have to work and I am unable to get off of work</td> </tr> <tr> <td>12</td> <td>covid_ab_reasons_no__12</td> <td>I am concerned about the possibility of becoming infected when I go for a test</td> </tr> <tr> <td>13</td> <td>covid_ab_reasons_no__13</td> <td>If I tested positive, people might judge me</td> </tr> <tr> <td>14</td> <td>covid_ab_reasons_no__14</td> <td>If I tested positive, I would have to isolate/self-quarantine</td> </tr> <tr> <td>15</td> <td>covid_ab_reasons_no__15</td> <td>I was already tested</td> </tr> <tr> <td>16</td> <td>covid_ab_reasons_no__16</td> <td>Other:</td> </tr> </table> | 1 | covid_ab_reasons_no__1 | I am concerned the test will be painful | 2                  | covid_ab_reasons_no__2 | I am concerned about the costs of the test | 3 | covid_ab_reasons_no__3 | I do not want to know | 4                   | covid_ab_reasons_no__4 | I do not think I have been exposed | 5 | covid_ab_reasons_no__5 | I do not and have not had symptoms | 6 | covid_ab_reasons_no__6 | I do not trust the accuracy of the tests | 7 | covid_ab_reasons_no__7 | I already had COVID-19 | 8 | covid_ab_reasons_no__8 | I am not concerned about COVID-19 | 9 | covid_ab_reasons_no__9 | I do not have access to transportation | 10 | covid_ab_reasons_no__10 | I do not have access to childcare | 11 | covid_ab_reasons_no__11 | I have to work and I am unable to get off of work | 12 | covid_ab_reasons_no__12 | I am concerned about the possibility of becoming infected when I go for a test | 13 | covid_ab_reasons_no__13 | If I tested positive, people might judge me | 14 | covid_ab_reasons_no__14 | If I tested positive, I would have to isolate/self-quarantine | 15 | covid_ab_reasons_no__15 | I was already tested | 16 | covid_ab_reasons_no__16 | Other: |
| 1  | covid_ab_reasons_no__1                                                                  | I am concerned the test will be painful                                                                                                                                |                                                                                                                                                                                                                                                                                                                                                                                                                                                                                                                                                                                                                                                                                                                                                                                                                                                                                                                                                                                                                                                                                                                                                                                                                                                                                                                                                                                                                                                                                                                                                                                                                                                                                                                                                                              |   |                        |                                         |                    |                        |                                            |   |                        |                       |                     |                        |                                    |   |                        |                                    |   |                        |                                          |   |                        |                        |   |                        |                                   |   |                        |                                        |    |                         |                                   |    |                         |                                                   |    |                         |                                                                                |    |                         |                                             |    |                         |                                                               |    |                         |                      |    |                         |        |
| 2  | covid_ab_reasons_no__2                                                                  | I am concerned about the costs of the test                                                                                                                             |                                                                                                                                                                                                                                                                                                                                                                                                                                                                                                                                                                                                                                                                                                                                                                                                                                                                                                                                                                                                                                                                                                                                                                                                                                                                                                                                                                                                                                                                                                                                                                                                                                                                                                                                                                              |   |                        |                                         |                    |                        |                                            |   |                        |                       |                     |                        |                                    |   |                        |                                    |   |                        |                                          |   |                        |                        |   |                        |                                   |   |                        |                                        |    |                         |                                   |    |                         |                                                   |    |                         |                                                                                |    |                         |                                             |    |                         |                                                               |    |                         |                      |    |                         |        |
| 3  | covid_ab_reasons_no__3                                                                  | I do not want to know                                                                                                                                                  |                                                                                                                                                                                                                                                                                                                                                                                                                                                                                                                                                                                                                                                                                                                                                                                                                                                                                                                                                                                                                                                                                                                                                                                                                                                                                                                                                                                                                                                                                                                                                                                                                                                                                                                                                                              |   |                        |                                         |                    |                        |                                            |   |                        |                       |                     |                        |                                    |   |                        |                                    |   |                        |                                          |   |                        |                        |   |                        |                                   |   |                        |                                        |    |                         |                                   |    |                         |                                                   |    |                         |                                                                                |    |                         |                                             |    |                         |                                                               |    |                         |                      |    |                         |        |
| 4  | covid_ab_reasons_no__4                                                                  | I do not think I have been exposed                                                                                                                                     |                                                                                                                                                                                                                                                                                                                                                                                                                                                                                                                                                                                                                                                                                                                                                                                                                                                                                                                                                                                                                                                                                                                                                                                                                                                                                                                                                                                                                                                                                                                                                                                                                                                                                                                                                                              |   |                        |                                         |                    |                        |                                            |   |                        |                       |                     |                        |                                    |   |                        |                                    |   |                        |                                          |   |                        |                        |   |                        |                                   |   |                        |                                        |    |                         |                                   |    |                         |                                                   |    |                         |                                                                                |    |                         |                                             |    |                         |                                                               |    |                         |                      |    |                         |        |
| 5  | covid_ab_reasons_no__5                                                                  | I do not and have not had symptoms                                                                                                                                     |                                                                                                                                                                                                                                                                                                                                                                                                                                                                                                                                                                                                                                                                                                                                                                                                                                                                                                                                                                                                                                                                                                                                                                                                                                                                                                                                                                                                                                                                                                                                                                                                                                                                                                                                                                              |   |                        |                                         |                    |                        |                                            |   |                        |                       |                     |                        |                                    |   |                        |                                    |   |                        |                                          |   |                        |                        |   |                        |                                   |   |                        |                                        |    |                         |                                   |    |                         |                                                   |    |                         |                                                                                |    |                         |                                             |    |                         |                                                               |    |                         |                      |    |                         |        |
| 6  | covid_ab_reasons_no__6                                                                  | I do not trust the accuracy of the tests                                                                                                                               |                                                                                                                                                                                                                                                                                                                                                                                                                                                                                                                                                                                                                                                                                                                                                                                                                                                                                                                                                                                                                                                                                                                                                                                                                                                                                                                                                                                                                                                                                                                                                                                                                                                                                                                                                                              |   |                        |                                         |                    |                        |                                            |   |                        |                       |                     |                        |                                    |   |                        |                                    |   |                        |                                          |   |                        |                        |   |                        |                                   |   |                        |                                        |    |                         |                                   |    |                         |                                                   |    |                         |                                                                                |    |                         |                                             |    |                         |                                                               |    |                         |                      |    |                         |        |
| 7  | covid_ab_reasons_no__7                                                                  | I already had COVID-19                                                                                                                                                 |                                                                                                                                                                                                                                                                                                                                                                                                                                                                                                                                                                                                                                                                                                                                                                                                                                                                                                                                                                                                                                                                                                                                                                                                                                                                                                                                                                                                                                                                                                                                                                                                                                                                                                                                                                              |   |                        |                                         |                    |                        |                                            |   |                        |                       |                     |                        |                                    |   |                        |                                    |   |                        |                                          |   |                        |                        |   |                        |                                   |   |                        |                                        |    |                         |                                   |    |                         |                                                   |    |                         |                                                                                |    |                         |                                             |    |                         |                                                               |    |                         |                      |    |                         |        |
| 8  | covid_ab_reasons_no__8                                                                  | I am not concerned about COVID-19                                                                                                                                      |                                                                                                                                                                                                                                                                                                                                                                                                                                                                                                                                                                                                                                                                                                                                                                                                                                                                                                                                                                                                                                                                                                                                                                                                                                                                                                                                                                                                                                                                                                                                                                                                                                                                                                                                                                              |   |                        |                                         |                    |                        |                                            |   |                        |                       |                     |                        |                                    |   |                        |                                    |   |                        |                                          |   |                        |                        |   |                        |                                   |   |                        |                                        |    |                         |                                   |    |                         |                                                   |    |                         |                                                                                |    |                         |                                             |    |                         |                                                               |    |                         |                      |    |                         |        |
| 9  | covid_ab_reasons_no__9                                                                  | I do not have access to transportation                                                                                                                                 |                                                                                                                                                                                                                                                                                                                                                                                                                                                                                                                                                                                                                                                                                                                                                                                                                                                                                                                                                                                                                                                                                                                                                                                                                                                                                                                                                                                                                                                                                                                                                                                                                                                                                                                                                                              |   |                        |                                         |                    |                        |                                            |   |                        |                       |                     |                        |                                    |   |                        |                                    |   |                        |                                          |   |                        |                        |   |                        |                                   |   |                        |                                        |    |                         |                                   |    |                         |                                                   |    |                         |                                                                                |    |                         |                                             |    |                         |                                                               |    |                         |                      |    |                         |        |
| 10 | covid_ab_reasons_no__10                                                                 | I do not have access to childcare                                                                                                                                      |                                                                                                                                                                                                                                                                                                                                                                                                                                                                                                                                                                                                                                                                                                                                                                                                                                                                                                                                                                                                                                                                                                                                                                                                                                                                                                                                                                                                                                                                                                                                                                                                                                                                                                                                                                              |   |                        |                                         |                    |                        |                                            |   |                        |                       |                     |                        |                                    |   |                        |                                    |   |                        |                                          |   |                        |                        |   |                        |                                   |   |                        |                                        |    |                         |                                   |    |                         |                                                   |    |                         |                                                                                |    |                         |                                             |    |                         |                                                               |    |                         |                      |    |                         |        |
| 11 | covid_ab_reasons_no__11                                                                 | I have to work and I am unable to get off of work                                                                                                                      |                                                                                                                                                                                                                                                                                                                                                                                                                                                                                                                                                                                                                                                                                                                                                                                                                                                                                                                                                                                                                                                                                                                                                                                                                                                                                                                                                                                                                                                                                                                                                                                                                                                                                                                                                                              |   |                        |                                         |                    |                        |                                            |   |                        |                       |                     |                        |                                    |   |                        |                                    |   |                        |                                          |   |                        |                        |   |                        |                                   |   |                        |                                        |    |                         |                                   |    |                         |                                                   |    |                         |                                                                                |    |                         |                                             |    |                         |                                                               |    |                         |                      |    |                         |        |
| 12 | covid_ab_reasons_no__12                                                                 | I am concerned about the possibility of becoming infected when I go for a test                                                                                         |                                                                                                                                                                                                                                                                                                                                                                                                                                                                                                                                                                                                                                                                                                                                                                                                                                                                                                                                                                                                                                                                                                                                                                                                                                                                                                                                                                                                                                                                                                                                                                                                                                                                                                                                                                              |   |                        |                                         |                    |                        |                                            |   |                        |                       |                     |                        |                                    |   |                        |                                    |   |                        |                                          |   |                        |                        |   |                        |                                   |   |                        |                                        |    |                         |                                   |    |                         |                                                   |    |                         |                                                                                |    |                         |                                             |    |                         |                                                               |    |                         |                      |    |                         |        |
| 13 | covid_ab_reasons_no__13                                                                 | If I tested positive, people might judge me                                                                                                                            |                                                                                                                                                                                                                                                                                                                                                                                                                                                                                                                                                                                                                                                                                                                                                                                                                                                                                                                                                                                                                                                                                                                                                                                                                                                                                                                                                                                                                                                                                                                                                                                                                                                                                                                                                                              |   |                        |                                         |                    |                        |                                            |   |                        |                       |                     |                        |                                    |   |                        |                                    |   |                        |                                          |   |                        |                        |   |                        |                                   |   |                        |                                        |    |                         |                                   |    |                         |                                                   |    |                         |                                                                                |    |                         |                                             |    |                         |                                                               |    |                         |                      |    |                         |        |
| 14 | covid_ab_reasons_no__14                                                                 | If I tested positive, I would have to isolate/self-quarantine                                                                                                          |                                                                                                                                                                                                                                                                                                                                                                                                                                                                                                                                                                                                                                                                                                                                                                                                                                                                                                                                                                                                                                                                                                                                                                                                                                                                                                                                                                                                                                                                                                                                                                                                                                                                                                                                                                              |   |                        |                                         |                    |                        |                                            |   |                        |                       |                     |                        |                                    |   |                        |                                    |   |                        |                                          |   |                        |                        |   |                        |                                   |   |                        |                                        |    |                         |                                   |    |                         |                                                   |    |                         |                                                                                |    |                         |                                             |    |                         |                                                               |    |                         |                      |    |                         |        |
| 15 | covid_ab_reasons_no__15                                                                 | I was already tested                                                                                                                                                   |                                                                                                                                                                                                                                                                                                                                                                                                                                                                                                                                                                                                                                                                                                                                                                                                                                                                                                                                                                                                                                                                                                                                                                                                                                                                                                                                                                                                                                                                                                                                                                                                                                                                                                                                                                              |   |                        |                                         |                    |                        |                                            |   |                        |                       |                     |                        |                                    |   |                        |                                    |   |                        |                                          |   |                        |                        |   |                        |                                   |   |                        |                                        |    |                         |                                   |    |                         |                                                   |    |                         |                                                                                |    |                         |                                             |    |                         |                                                               |    |                         |                      |    |                         |        |
| 16 | covid_ab_reasons_no__16                                                                 | Other:                                                                                                                                                                 |                                                                                                                                                                                                                                                                                                                                                                                                                                                                                                                                                                                                                                                                                                                                                                                                                                                                                                                                                                                                                                                                                                                                                                                                                                                                                                                                                                                                                                                                                                                                                                                                                                                                                                                                                                              |   |                        |                                         |                    |                        |                                            |   |                        |                       |                     |                        |                                    |   |                        |                                    |   |                        |                                          |   |                        |                        |   |                        |                                   |   |                        |                                        |    |                         |                                   |    |                         |                                                   |    |                         |                                                                                |    |                         |                                             |    |                         |                                                               |    |                         |                      |    |                         |        |
| 58 | covid_ab_reasons_no_other<br>Show the field ONLY if:<br>[covid_ab_reasons_no(16)] = '1' | Other (please specify):                                                                                                                                                | text                                                                                                                                                                                                                                                                                                                                                                                                                                                                                                                                                                                                                                                                                                                                                                                                                                                                                                                                                                                                                                                                                                                                                                                                                                                                                                                                                                                                                                                                                                                                                                                                                                                                                                                                                                         |   |                        |                                         |                    |                        |                                            |   |                        |                       |                     |                        |                                    |   |                        |                                    |   |                        |                                          |   |                        |                        |   |                        |                                   |   |                        |                                        |    |                         |                                   |    |                         |                                                   |    |                         |                                                                                |    |                         |                                             |    |                         |                                                               |    |                         |                      |    |                         |        |
| 59 | covid_concern                                                                           | How concerned are you about becoming infected with SARS-CoV-2? If you've previously tested positive, how concerned are you about becoming re-infected with SARS-CoV-2? | radio, Required <table border="1" data-bbox="1044 1478 1279 1675"> <tr> <td>1</td> <td>Not at all concerned</td> </tr> <tr> <td>2</td> <td>A little concerned</td> </tr> <tr> <td>3</td> <td>Somewhat concerned</td> </tr> <tr> <td>4</td> <td>Concerned</td> </tr> <tr> <td>5</td> <td>Very much concerned</td> </tr> </table>                                                                                                                                                                                                                                                                                                                                                                                                                                                                                                                                                                                                                                                                                                                                                                                                                                                                                                                                                                                                                                                                                                                                                                                                                                                                                                                                                                                                                                              | 1 | Not at all concerned   | 2                                       | A little concerned | 3                      | Somewhat concerned                         | 4 | Concerned              | 5                     | Very much concerned |                        |                                    |   |                        |                                    |   |                        |                                          |   |                        |                        |   |                        |                                   |   |                        |                                        |    |                         |                                   |    |                         |                                                   |    |                         |                                                                                |    |                         |                                             |    |                         |                                                               |    |                         |                      |    |                         |        |
| 1  | Not at all concerned                                                                    |                                                                                                                                                                        |                                                                                                                                                                                                                                                                                                                                                                                                                                                                                                                                                                                                                                                                                                                                                                                                                                                                                                                                                                                                                                                                                                                                                                                                                                                                                                                                                                                                                                                                                                                                                                                                                                                                                                                                                                              |   |                        |                                         |                    |                        |                                            |   |                        |                       |                     |                        |                                    |   |                        |                                    |   |                        |                                          |   |                        |                        |   |                        |                                   |   |                        |                                        |    |                         |                                   |    |                         |                                                   |    |                         |                                                                                |    |                         |                                             |    |                         |                                                               |    |                         |                      |    |                         |        |
| 2  | A little concerned                                                                      |                                                                                                                                                                        |                                                                                                                                                                                                                                                                                                                                                                                                                                                                                                                                                                                                                                                                                                                                                                                                                                                                                                                                                                                                                                                                                                                                                                                                                                                                                                                                                                                                                                                                                                                                                                                                                                                                                                                                                                              |   |                        |                                         |                    |                        |                                            |   |                        |                       |                     |                        |                                    |   |                        |                                    |   |                        |                                          |   |                        |                        |   |                        |                                   |   |                        |                                        |    |                         |                                   |    |                         |                                                   |    |                         |                                                                                |    |                         |                                             |    |                         |                                                               |    |                         |                      |    |                         |        |
| 3  | Somewhat concerned                                                                      |                                                                                                                                                                        |                                                                                                                                                                                                                                                                                                                                                                                                                                                                                                                                                                                                                                                                                                                                                                                                                                                                                                                                                                                                                                                                                                                                                                                                                                                                                                                                                                                                                                                                                                                                                                                                                                                                                                                                                                              |   |                        |                                         |                    |                        |                                            |   |                        |                       |                     |                        |                                    |   |                        |                                    |   |                        |                                          |   |                        |                        |   |                        |                                   |   |                        |                                        |    |                         |                                   |    |                         |                                                   |    |                         |                                                                                |    |                         |                                             |    |                         |                                                               |    |                         |                      |    |                         |        |
| 4  | Concerned                                                                               |                                                                                                                                                                        |                                                                                                                                                                                                                                                                                                                                                                                                                                                                                                                                                                                                                                                                                                                                                                                                                                                                                                                                                                                                                                                                                                                                                                                                                                                                                                                                                                                                                                                                                                                                                                                                                                                                                                                                                                              |   |                        |                                         |                    |                        |                                            |   |                        |                       |                     |                        |                                    |   |                        |                                    |   |                        |                                          |   |                        |                        |   |                        |                                   |   |                        |                                        |    |                         |                                   |    |                         |                                                   |    |                         |                                                                                |    |                         |                                             |    |                         |                                                               |    |                         |                      |    |                         |        |
| 5  | Very much concerned                                                                     |                                                                                                                                                                        |                                                                                                                                                                                                                                                                                                                                                                                                                                                                                                                                                                                                                                                                                                                                                                                                                                                                                                                                                                                                                                                                                                                                                                                                                                                                                                                                                                                                                                                                                                                                                                                                                                                                                                                                                                              |   |                        |                                         |                    |                        |                                            |   |                        |                       |                     |                        |                                    |   |                        |                                    |   |                        |                                          |   |                        |                        |   |                        |                                   |   |                        |                                        |    |                         |                                   |    |                         |                                                   |    |                         |                                                                                |    |                         |                                             |    |                         |                                                               |    |                         |                      |    |                         |        |

|                    |                                                                                                                      |                                                                                                               |                                                                                                                                                                                                                                                                                                                                                                                                                                                                                                                                                                                                                                                                                                                                                                                                                                                                                                                        |                    |  |   |                                                                                                        |   |                                                                     |   |                                                                                                  |   |                                                                               |   |                                                                                                                      |   |                                                   |   |                                                       |   |                                    |
|--------------------|----------------------------------------------------------------------------------------------------------------------|---------------------------------------------------------------------------------------------------------------|------------------------------------------------------------------------------------------------------------------------------------------------------------------------------------------------------------------------------------------------------------------------------------------------------------------------------------------------------------------------------------------------------------------------------------------------------------------------------------------------------------------------------------------------------------------------------------------------------------------------------------------------------------------------------------------------------------------------------------------------------------------------------------------------------------------------------------------------------------------------------------------------------------------------|--------------------|--|---|--------------------------------------------------------------------------------------------------------|---|---------------------------------------------------------------------|---|--------------------------------------------------------------------------------------------------|---|-------------------------------------------------------------------------------|---|----------------------------------------------------------------------------------------------------------------------|---|---------------------------------------------------|---|-------------------------------------------------------|---|------------------------------------|
| 60                 | covid_concern_reasons                                                                                                | What are some reasons you are concerned about being infected with SARS-CoV-2? (check all that apply)          | <table border="1"> <tr> <td colspan="2">checkbox, Required</td> </tr> <tr> <td>1</td> <td>covid_concern_reasons__1<br/>In general, I am someone who gets concerned about things I cannot control.</td> </tr> <tr> <td>2</td> <td>covid_concern_reasons__2<br/>I will feel very ill and uncomfortable.</td> </tr> <tr> <td>3</td> <td>covid_concern_reasons__3<br/>I will not be able to breathe well and I hate feeling out of breath.</td> </tr> <tr> <td>4</td> <td>covid_concern_reasons__4<br/>I do not want to be in the hospital.</td> </tr> <tr> <td>5</td> <td>covid_concern_reasons__5<br/>I do not want to get others (family, friends) sick.</td> </tr> <tr> <td>6</td> <td>covid_concern_reasons__6<br/>I am afraid of dying.</td> </tr> <tr> <td>7</td> <td>covid_concern_reasons__7<br/>I am not concerned at all</td> </tr> <tr> <td>8</td> <td>covid_concern_reasons__8<br/>Other:</td> </tr> </table> | checkbox, Required |  | 1 | covid_concern_reasons__1<br>In general, I am someone who gets concerned about things I cannot control. | 2 | covid_concern_reasons__2<br>I will feel very ill and uncomfortable. | 3 | covid_concern_reasons__3<br>I will not be able to breathe well and I hate feeling out of breath. | 4 | covid_concern_reasons__4<br>I do not want to be in the hospital.              | 5 | covid_concern_reasons__5<br>I do not want to get others (family, friends) sick.                                      | 6 | covid_concern_reasons__6<br>I am afraid of dying. | 7 | covid_concern_reasons__7<br>I am not concerned at all | 8 | covid_concern_reasons__8<br>Other: |
| checkbox, Required |                                                                                                                      |                                                                                                               |                                                                                                                                                                                                                                                                                                                                                                                                                                                                                                                                                                                                                                                                                                                                                                                                                                                                                                                        |                    |  |   |                                                                                                        |   |                                                                     |   |                                                                                                  |   |                                                                               |   |                                                                                                                      |   |                                                   |   |                                                       |   |                                    |
| 1                  | covid_concern_reasons__1<br>In general, I am someone who gets concerned about things I cannot control.               |                                                                                                               |                                                                                                                                                                                                                                                                                                                                                                                                                                                                                                                                                                                                                                                                                                                                                                                                                                                                                                                        |                    |  |   |                                                                                                        |   |                                                                     |   |                                                                                                  |   |                                                                               |   |                                                                                                                      |   |                                                   |   |                                                       |   |                                    |
| 2                  | covid_concern_reasons__2<br>I will feel very ill and uncomfortable.                                                  |                                                                                                               |                                                                                                                                                                                                                                                                                                                                                                                                                                                                                                                                                                                                                                                                                                                                                                                                                                                                                                                        |                    |  |   |                                                                                                        |   |                                                                     |   |                                                                                                  |   |                                                                               |   |                                                                                                                      |   |                                                   |   |                                                       |   |                                    |
| 3                  | covid_concern_reasons__3<br>I will not be able to breathe well and I hate feeling out of breath.                     |                                                                                                               |                                                                                                                                                                                                                                                                                                                                                                                                                                                                                                                                                                                                                                                                                                                                                                                                                                                                                                                        |                    |  |   |                                                                                                        |   |                                                                     |   |                                                                                                  |   |                                                                               |   |                                                                                                                      |   |                                                   |   |                                                       |   |                                    |
| 4                  | covid_concern_reasons__4<br>I do not want to be in the hospital.                                                     |                                                                                                               |                                                                                                                                                                                                                                                                                                                                                                                                                                                                                                                                                                                                                                                                                                                                                                                                                                                                                                                        |                    |  |   |                                                                                                        |   |                                                                     |   |                                                                                                  |   |                                                                               |   |                                                                                                                      |   |                                                   |   |                                                       |   |                                    |
| 5                  | covid_concern_reasons__5<br>I do not want to get others (family, friends) sick.                                      |                                                                                                               |                                                                                                                                                                                                                                                                                                                                                                                                                                                                                                                                                                                                                                                                                                                                                                                                                                                                                                                        |                    |  |   |                                                                                                        |   |                                                                     |   |                                                                                                  |   |                                                                               |   |                                                                                                                      |   |                                                   |   |                                                       |   |                                    |
| 6                  | covid_concern_reasons__6<br>I am afraid of dying.                                                                    |                                                                                                               |                                                                                                                                                                                                                                                                                                                                                                                                                                                                                                                                                                                                                                                                                                                                                                                                                                                                                                                        |                    |  |   |                                                                                                        |   |                                                                     |   |                                                                                                  |   |                                                                               |   |                                                                                                                      |   |                                                   |   |                                                       |   |                                    |
| 7                  | covid_concern_reasons__7<br>I am not concerned at all                                                                |                                                                                                               |                                                                                                                                                                                                                                                                                                                                                                                                                                                                                                                                                                                                                                                                                                                                                                                                                                                                                                                        |                    |  |   |                                                                                                        |   |                                                                     |   |                                                                                                  |   |                                                                               |   |                                                                                                                      |   |                                                   |   |                                                       |   |                                    |
| 8                  | covid_concern_reasons__8<br>Other:                                                                                   |                                                                                                               |                                                                                                                                                                                                                                                                                                                                                                                                                                                                                                                                                                                                                                                                                                                                                                                                                                                                                                                        |                    |  |   |                                                                                                        |   |                                                                     |   |                                                                                                  |   |                                                                               |   |                                                                                                                      |   |                                                   |   |                                                       |   |                                    |
| 61                 | covid_concern_reasons_other<br>Show the field ONLY if:<br>[covid_concern_reasons(8)] = '1'                           | Other (please specify):                                                                                       | text                                                                                                                                                                                                                                                                                                                                                                                                                                                                                                                                                                                                                                                                                                                                                                                                                                                                                                                   |                    |  |   |                                                                                                        |   |                                                                     |   |                                                                                                  |   |                                                                               |   |                                                                                                                      |   |                                                   |   |                                                       |   |                                    |
| 62                 | covid_concern_no                                                                                                     | What are some reasons you are NOT concerned about becoming infected with SARS-CoV-2 ? (check all that apply)  | <table border="1"> <tr> <td colspan="2">checkbox, Required</td> </tr> <tr> <td>1</td> <td>covid_concern_no__1<br/>In general, I try not to get concerned about things I cannot control.</td> </tr> <tr> <td>2</td> <td>covid_concern_no__2<br/>I do not believe it is as bad as they say.</td> </tr> <tr> <td>3</td> <td>covid_concern_no__3<br/>I am relatively healthy, so it should not affect me too much.</td> </tr> <tr> <td>4</td> <td>covid_concern_no__4<br/>I have been very sick in the past and made it through.</td> </tr> <tr> <td>5</td> <td>covid_concern_no__5<br/>I believe the medical teams are learning a lot and will be able to help me if I do need help.</td> </tr> <tr> <td>6</td> <td>covid_concern_no__6<br/>Other:</td> </tr> </table>                                                                                                                                                    | checkbox, Required |  | 1 | covid_concern_no__1<br>In general, I try not to get concerned about things I cannot control.           | 2 | covid_concern_no__2<br>I do not believe it is as bad as they say.   | 3 | covid_concern_no__3<br>I am relatively healthy, so it should not affect me too much.             | 4 | covid_concern_no__4<br>I have been very sick in the past and made it through. | 5 | covid_concern_no__5<br>I believe the medical teams are learning a lot and will be able to help me if I do need help. | 6 | covid_concern_no__6<br>Other:                     |   |                                                       |   |                                    |
| checkbox, Required |                                                                                                                      |                                                                                                               |                                                                                                                                                                                                                                                                                                                                                                                                                                                                                                                                                                                                                                                                                                                                                                                                                                                                                                                        |                    |  |   |                                                                                                        |   |                                                                     |   |                                                                                                  |   |                                                                               |   |                                                                                                                      |   |                                                   |   |                                                       |   |                                    |
| 1                  | covid_concern_no__1<br>In general, I try not to get concerned about things I cannot control.                         |                                                                                                               |                                                                                                                                                                                                                                                                                                                                                                                                                                                                                                                                                                                                                                                                                                                                                                                                                                                                                                                        |                    |  |   |                                                                                                        |   |                                                                     |   |                                                                                                  |   |                                                                               |   |                                                                                                                      |   |                                                   |   |                                                       |   |                                    |
| 2                  | covid_concern_no__2<br>I do not believe it is as bad as they say.                                                    |                                                                                                               |                                                                                                                                                                                                                                                                                                                                                                                                                                                                                                                                                                                                                                                                                                                                                                                                                                                                                                                        |                    |  |   |                                                                                                        |   |                                                                     |   |                                                                                                  |   |                                                                               |   |                                                                                                                      |   |                                                   |   |                                                       |   |                                    |
| 3                  | covid_concern_no__3<br>I am relatively healthy, so it should not affect me too much.                                 |                                                                                                               |                                                                                                                                                                                                                                                                                                                                                                                                                                                                                                                                                                                                                                                                                                                                                                                                                                                                                                                        |                    |  |   |                                                                                                        |   |                                                                     |   |                                                                                                  |   |                                                                               |   |                                                                                                                      |   |                                                   |   |                                                       |   |                                    |
| 4                  | covid_concern_no__4<br>I have been very sick in the past and made it through.                                        |                                                                                                               |                                                                                                                                                                                                                                                                                                                                                                                                                                                                                                                                                                                                                                                                                                                                                                                                                                                                                                                        |                    |  |   |                                                                                                        |   |                                                                     |   |                                                                                                  |   |                                                                               |   |                                                                                                                      |   |                                                   |   |                                                       |   |                                    |
| 5                  | covid_concern_no__5<br>I believe the medical teams are learning a lot and will be able to help me if I do need help. |                                                                                                               |                                                                                                                                                                                                                                                                                                                                                                                                                                                                                                                                                                                                                                                                                                                                                                                                                                                                                                                        |                    |  |   |                                                                                                        |   |                                                                     |   |                                                                                                  |   |                                                                               |   |                                                                                                                      |   |                                                   |   |                                                       |   |                                    |
| 6                  | covid_concern_no__6<br>Other:                                                                                        |                                                                                                               |                                                                                                                                                                                                                                                                                                                                                                                                                                                                                                                                                                                                                                                                                                                                                                                                                                                                                                                        |                    |  |   |                                                                                                        |   |                                                                     |   |                                                                                                  |   |                                                                               |   |                                                                                                                      |   |                                                   |   |                                                       |   |                                    |
| 63                 | covid_concern_no_other<br>Show the field ONLY if:<br>[covid_concern_no(6)] = '1'                                     | Other (please specify):                                                                                       | text                                                                                                                                                                                                                                                                                                                                                                                                                                                                                                                                                                                                                                                                                                                                                                                                                                                                                                                   |                    |  |   |                                                                                                        |   |                                                                     |   |                                                                                                  |   |                                                                               |   |                                                                                                                      |   |                                                   |   |                                                       |   |                                    |
| 64                 | covid_vaccine                                                                                                        | If there was a vaccine that could prevent COVID-19 in the future, how likely would YOU be to get the vaccine? | <table border="1"> <tr> <td colspan="2">radio</td> </tr> <tr> <td>1</td> <td>Not at all likely</td> </tr> <tr> <td>2</td> <td>Not likely</td> </tr> <tr> <td>3</td> <td>Somewhat likely</td> </tr> <tr> <td>4</td> <td>Likely</td> </tr> <tr> <td>5</td> <td>Very likely</td> </tr> </table>                                                                                                                                                                                                                                                                                                                                                                                                                                                                                                                                                                                                                           | radio              |  | 1 | Not at all likely                                                                                      | 2 | Not likely                                                          | 3 | Somewhat likely                                                                                  | 4 | Likely                                                                        | 5 | Very likely                                                                                                          |   |                                                   |   |                                                       |   |                                    |
| radio              |                                                                                                                      |                                                                                                               |                                                                                                                                                                                                                                                                                                                                                                                                                                                                                                                                                                                                                                                                                                                                                                                                                                                                                                                        |                    |  |   |                                                                                                        |   |                                                                     |   |                                                                                                  |   |                                                                               |   |                                                                                                                      |   |                                                   |   |                                                       |   |                                    |
| 1                  | Not at all likely                                                                                                    |                                                                                                               |                                                                                                                                                                                                                                                                                                                                                                                                                                                                                                                                                                                                                                                                                                                                                                                                                                                                                                                        |                    |  |   |                                                                                                        |   |                                                                     |   |                                                                                                  |   |                                                                               |   |                                                                                                                      |   |                                                   |   |                                                       |   |                                    |
| 2                  | Not likely                                                                                                           |                                                                                                               |                                                                                                                                                                                                                                                                                                                                                                                                                                                                                                                                                                                                                                                                                                                                                                                                                                                                                                                        |                    |  |   |                                                                                                        |   |                                                                     |   |                                                                                                  |   |                                                                               |   |                                                                                                                      |   |                                                   |   |                                                       |   |                                    |
| 3                  | Somewhat likely                                                                                                      |                                                                                                               |                                                                                                                                                                                                                                                                                                                                                                                                                                                                                                                                                                                                                                                                                                                                                                                                                                                                                                                        |                    |  |   |                                                                                                        |   |                                                                     |   |                                                                                                  |   |                                                                               |   |                                                                                                                      |   |                                                   |   |                                                       |   |                                    |
| 4                  | Likely                                                                                                               |                                                                                                               |                                                                                                                                                                                                                                                                                                                                                                                                                                                                                                                                                                                                                                                                                                                                                                                                                                                                                                                        |                    |  |   |                                                                                                        |   |                                                                     |   |                                                                                                  |   |                                                                               |   |                                                                                                                      |   |                                                   |   |                                                       |   |                                    |
| 5                  | Very likely                                                                                                          |                                                                                                               |                                                                                                                                                                                                                                                                                                                                                                                                                                                                                                                                                                                                                                                                                                                                                                                                                                                                                                                        |                    |  |   |                                                                                                        |   |                                                                     |   |                                                                                                  |   |                                                                               |   |                                                                                                                      |   |                                                   |   |                                                       |   |                                    |

| 65              | covid_vaccine_reasons                                                                                              | What are some reason(s) YOU may NOT want the vaccine?<br>(check all that apply)<br><i>If there are no reasons, do not mark any responses.</i>                                                                                           | <table border="1"> <thead> <tr> <th colspan="2">checkbox</th> </tr> </thead> <tbody> <tr> <td>1</td> <td>covid_vaccine_reasons__1   I am not worried about getting COVID-19</td> </tr> <tr> <td>2</td> <td>covid_vaccine_reasons__2   Vaccines are still questionably safe</td> </tr> <tr> <td>3</td> <td>covid_vaccine_reasons__3   Vaccines are expensive</td> </tr> <tr> <td>4</td> <td>covid_vaccine_reasons__4   There is not enough information about the vaccine for COVID-19</td> </tr> <tr> <td>5</td> <td>covid_vaccine_reasons__5   Already received too many vaccines</td> </tr> <tr> <td>6</td> <td>covid_vaccine_reasons__6   Vaccines can have negative side effects</td> </tr> <tr> <td>7</td> <td>covid_vaccine_reasons__7   Vaccines have needles, which can be painful and/or scary</td> </tr> <tr> <td>8</td> <td>covid_vaccine_reasons__8   Vaccines are part of a government program, and I am suspicious of the government agenda</td> </tr> <tr> <td>9</td> <td>covid_vaccine_reasons__9   Other:</td> </tr> </tbody> </table> | checkbox        |  | 1 | covid_vaccine_reasons__1   I am not worried about getting COVID-19 | 2 | covid_vaccine_reasons__2   Vaccines are still questionably safe | 3 | covid_vaccine_reasons__3   Vaccines are expensive | 4 | covid_vaccine_reasons__4   There is not enough information about the vaccine for COVID-19 | 5 | covid_vaccine_reasons__5   Already received too many vaccines | 6 | covid_vaccine_reasons__6   Vaccines can have negative side effects | 7 | covid_vaccine_reasons__7   Vaccines have needles, which can be painful and/or scary | 8 | covid_vaccine_reasons__8   Vaccines are part of a government program, and I am suspicious of the government agenda | 9 | covid_vaccine_reasons__9   Other: |
|-----------------|--------------------------------------------------------------------------------------------------------------------|-----------------------------------------------------------------------------------------------------------------------------------------------------------------------------------------------------------------------------------------|--------------------------------------------------------------------------------------------------------------------------------------------------------------------------------------------------------------------------------------------------------------------------------------------------------------------------------------------------------------------------------------------------------------------------------------------------------------------------------------------------------------------------------------------------------------------------------------------------------------------------------------------------------------------------------------------------------------------------------------------------------------------------------------------------------------------------------------------------------------------------------------------------------------------------------------------------------------------------------------------------------------------------------------------------------|-----------------|--|---|--------------------------------------------------------------------|---|-----------------------------------------------------------------|---|---------------------------------------------------|---|-------------------------------------------------------------------------------------------|---|---------------------------------------------------------------|---|--------------------------------------------------------------------|---|-------------------------------------------------------------------------------------|---|--------------------------------------------------------------------------------------------------------------------|---|-----------------------------------|
| checkbox        |                                                                                                                    |                                                                                                                                                                                                                                         |                                                                                                                                                                                                                                                                                                                                                                                                                                                                                                                                                                                                                                                                                                                                                                                                                                                                                                                                                                                                                                                        |                 |  |   |                                                                    |   |                                                                 |   |                                                   |   |                                                                                           |   |                                                               |   |                                                                    |   |                                                                                     |   |                                                                                                                    |   |                                   |
| 1               | covid_vaccine_reasons__1   I am not worried about getting COVID-19                                                 |                                                                                                                                                                                                                                         |                                                                                                                                                                                                                                                                                                                                                                                                                                                                                                                                                                                                                                                                                                                                                                                                                                                                                                                                                                                                                                                        |                 |  |   |                                                                    |   |                                                                 |   |                                                   |   |                                                                                           |   |                                                               |   |                                                                    |   |                                                                                     |   |                                                                                                                    |   |                                   |
| 2               | covid_vaccine_reasons__2   Vaccines are still questionably safe                                                    |                                                                                                                                                                                                                                         |                                                                                                                                                                                                                                                                                                                                                                                                                                                                                                                                                                                                                                                                                                                                                                                                                                                                                                                                                                                                                                                        |                 |  |   |                                                                    |   |                                                                 |   |                                                   |   |                                                                                           |   |                                                               |   |                                                                    |   |                                                                                     |   |                                                                                                                    |   |                                   |
| 3               | covid_vaccine_reasons__3   Vaccines are expensive                                                                  |                                                                                                                                                                                                                                         |                                                                                                                                                                                                                                                                                                                                                                                                                                                                                                                                                                                                                                                                                                                                                                                                                                                                                                                                                                                                                                                        |                 |  |   |                                                                    |   |                                                                 |   |                                                   |   |                                                                                           |   |                                                               |   |                                                                    |   |                                                                                     |   |                                                                                                                    |   |                                   |
| 4               | covid_vaccine_reasons__4   There is not enough information about the vaccine for COVID-19                          |                                                                                                                                                                                                                                         |                                                                                                                                                                                                                                                                                                                                                                                                                                                                                                                                                                                                                                                                                                                                                                                                                                                                                                                                                                                                                                                        |                 |  |   |                                                                    |   |                                                                 |   |                                                   |   |                                                                                           |   |                                                               |   |                                                                    |   |                                                                                     |   |                                                                                                                    |   |                                   |
| 5               | covid_vaccine_reasons__5   Already received too many vaccines                                                      |                                                                                                                                                                                                                                         |                                                                                                                                                                                                                                                                                                                                                                                                                                                                                                                                                                                                                                                                                                                                                                                                                                                                                                                                                                                                                                                        |                 |  |   |                                                                    |   |                                                                 |   |                                                   |   |                                                                                           |   |                                                               |   |                                                                    |   |                                                                                     |   |                                                                                                                    |   |                                   |
| 6               | covid_vaccine_reasons__6   Vaccines can have negative side effects                                                 |                                                                                                                                                                                                                                         |                                                                                                                                                                                                                                                                                                                                                                                                                                                                                                                                                                                                                                                                                                                                                                                                                                                                                                                                                                                                                                                        |                 |  |   |                                                                    |   |                                                                 |   |                                                   |   |                                                                                           |   |                                                               |   |                                                                    |   |                                                                                     |   |                                                                                                                    |   |                                   |
| 7               | covid_vaccine_reasons__7   Vaccines have needles, which can be painful and/or scary                                |                                                                                                                                                                                                                                         |                                                                                                                                                                                                                                                                                                                                                                                                                                                                                                                                                                                                                                                                                                                                                                                                                                                                                                                                                                                                                                                        |                 |  |   |                                                                    |   |                                                                 |   |                                                   |   |                                                                                           |   |                                                               |   |                                                                    |   |                                                                                     |   |                                                                                                                    |   |                                   |
| 8               | covid_vaccine_reasons__8   Vaccines are part of a government program, and I am suspicious of the government agenda |                                                                                                                                                                                                                                         |                                                                                                                                                                                                                                                                                                                                                                                                                                                                                                                                                                                                                                                                                                                                                                                                                                                                                                                                                                                                                                                        |                 |  |   |                                                                    |   |                                                                 |   |                                                   |   |                                                                                           |   |                                                               |   |                                                                    |   |                                                                                     |   |                                                                                                                    |   |                                   |
| 9               | covid_vaccine_reasons__9   Other:                                                                                  |                                                                                                                                                                                                                                         |                                                                                                                                                                                                                                                                                                                                                                                                                                                                                                                                                                                                                                                                                                                                                                                                                                                                                                                                                                                                                                                        |                 |  |   |                                                                    |   |                                                                 |   |                                                   |   |                                                                                           |   |                                                               |   |                                                                    |   |                                                                                     |   |                                                                                                                    |   |                                   |
| 66              | covid_vaccine_reasons_other<br>Show the field ONLY if:<br>[covid_vaccine_reasons(9)] = '1'                         | Other (please specify):                                                                                                                                                                                                                 | text                                                                                                                                                                                                                                                                                                                                                                                                                                                                                                                                                                                                                                                                                                                                                                                                                                                                                                                                                                                                                                                   |                 |  |   |                                                                    |   |                                                                 |   |                                                   |   |                                                                                           |   |                                                               |   |                                                                    |   |                                                                                     |   |                                                                                                                    |   |                                   |
| 67              | what_is_the_probability_th                                                                                         | What is the probability that you receive the flu vaccine this year?                                                                                                                                                                     | <table border="1"> <thead> <tr> <th colspan="2">radio</th> </tr> </thead> <tbody> <tr> <td>1</td> <td>Not at all likely</td> </tr> <tr> <td>2</td> <td>A little likely</td> </tr> <tr> <td>3</td> <td>Somewhat likely</td> </tr> <tr> <td>4</td> <td>Likely</td> </tr> <tr> <td>5</td> <td>Very likely</td> </tr> <tr> <td>6</td> <td>I already received the flu vaccine this year.</td> </tr> </tbody> </table>                                                                                                                                                                                                                                                                                                                                                                                                                                                                                                                                                                                                                                       | radio           |  | 1 | Not at all likely                                                  | 2 | A little likely                                                 | 3 | Somewhat likely                                   | 4 | Likely                                                                                    | 5 | Very likely                                                   | 6 | I already received the flu vaccine this year.                      |   |                                                                                     |   |                                                                                                                    |   |                                   |
| radio           |                                                                                                                    |                                                                                                                                                                                                                                         |                                                                                                                                                                                                                                                                                                                                                                                                                                                                                                                                                                                                                                                                                                                                                                                                                                                                                                                                                                                                                                                        |                 |  |   |                                                                    |   |                                                                 |   |                                                   |   |                                                                                           |   |                                                               |   |                                                                    |   |                                                                                     |   |                                                                                                                    |   |                                   |
| 1               | Not at all likely                                                                                                  |                                                                                                                                                                                                                                         |                                                                                                                                                                                                                                                                                                                                                                                                                                                                                                                                                                                                                                                                                                                                                                                                                                                                                                                                                                                                                                                        |                 |  |   |                                                                    |   |                                                                 |   |                                                   |   |                                                                                           |   |                                                               |   |                                                                    |   |                                                                                     |   |                                                                                                                    |   |                                   |
| 2               | A little likely                                                                                                    |                                                                                                                                                                                                                                         |                                                                                                                                                                                                                                                                                                                                                                                                                                                                                                                                                                                                                                                                                                                                                                                                                                                                                                                                                                                                                                                        |                 |  |   |                                                                    |   |                                                                 |   |                                                   |   |                                                                                           |   |                                                               |   |                                                                    |   |                                                                                     |   |                                                                                                                    |   |                                   |
| 3               | Somewhat likely                                                                                                    |                                                                                                                                                                                                                                         |                                                                                                                                                                                                                                                                                                                                                                                                                                                                                                                                                                                                                                                                                                                                                                                                                                                                                                                                                                                                                                                        |                 |  |   |                                                                    |   |                                                                 |   |                                                   |   |                                                                                           |   |                                                               |   |                                                                    |   |                                                                                     |   |                                                                                                                    |   |                                   |
| 4               | Likely                                                                                                             |                                                                                                                                                                                                                                         |                                                                                                                                                                                                                                                                                                                                                                                                                                                                                                                                                                                                                                                                                                                                                                                                                                                                                                                                                                                                                                                        |                 |  |   |                                                                    |   |                                                                 |   |                                                   |   |                                                                                           |   |                                                               |   |                                                                    |   |                                                                                     |   |                                                                                                                    |   |                                   |
| 5               | Very likely                                                                                                        |                                                                                                                                                                                                                                         |                                                                                                                                                                                                                                                                                                                                                                                                                                                                                                                                                                                                                                                                                                                                                                                                                                                                                                                                                                                                                                                        |                 |  |   |                                                                    |   |                                                                 |   |                                                   |   |                                                                                           |   |                                                               |   |                                                                    |   |                                                                                     |   |                                                                                                                    |   |                                   |
| 6               | I already received the flu vaccine this year.                                                                      |                                                                                                                                                                                                                                         |                                                                                                                                                                                                                                                                                                                                                                                                                                                                                                                                                                                                                                                                                                                                                                                                                                                                                                                                                                                                                                                        |                 |  |   |                                                                    |   |                                                                 |   |                                                   |   |                                                                                           |   |                                                               |   |                                                                    |   |                                                                                     |   |                                                                                                                    |   |                                   |
| 68              | covid_caregiver                                                                                                    | Section Header: <i>Survey Progress: 0% These next questions are about the child(ren) in your care. If there are no children in your care, no questions will appear.</i><br>Are you a primary caregiver of children under the age of 18? | <table border="1"> <thead> <tr> <th colspan="2">yesno, Required</th> </tr> </thead> <tbody> <tr> <td>1</td> <td>Yes</td> </tr> <tr> <td>0</td> <td>No</td> </tr> </tbody> </table>                                                                                                                                                                                                                                                                                                                                                                                                                                                                                                                                                                                                                                                                                                                                                                                                                                                                     | yesno, Required |  | 1 | Yes                                                                | 0 | No                                                              |   |                                                   |   |                                                                                           |   |                                                               |   |                                                                    |   |                                                                                     |   |                                                                                                                    |   |                                   |
| yesno, Required |                                                                                                                    |                                                                                                                                                                                                                                         |                                                                                                                                                                                                                                                                                                                                                                                                                                                                                                                                                                                                                                                                                                                                                                                                                                                                                                                                                                                                                                                        |                 |  |   |                                                                    |   |                                                                 |   |                                                   |   |                                                                                           |   |                                                               |   |                                                                    |   |                                                                                     |   |                                                                                                                    |   |                                   |
| 1               | Yes                                                                                                                |                                                                                                                                                                                                                                         |                                                                                                                                                                                                                                                                                                                                                                                                                                                                                                                                                                                                                                                                                                                                                                                                                                                                                                                                                                                                                                                        |                 |  |   |                                                                    |   |                                                                 |   |                                                   |   |                                                                                           |   |                                                               |   |                                                                    |   |                                                                                     |   |                                                                                                                    |   |                                   |
| 0               | No                                                                                                                 |                                                                                                                                                                                                                                         |                                                                                                                                                                                                                                                                                                                                                                                                                                                                                                                                                                                                                                                                                                                                                                                                                                                                                                                                                                                                                                                        |                 |  |   |                                                                    |   |                                                                 |   |                                                   |   |                                                                                           |   |                                                               |   |                                                                    |   |                                                                                     |   |                                                                                                                    |   |                                   |
| 69              | covid_children_pcr<br>Show the field ONLY if:<br>[covid_caregiver] = '1'                                           | If you were offered a swab test of the nose for SARS-CoV-2 today FOR THE CHILD(REN) IN YOUR CARE, how likely would you be to have them tested?                                                                                          | <table border="1"> <thead> <tr> <th colspan="2">radio</th> </tr> </thead> <tbody> <tr> <td>1</td> <td>Not at all likely</td> </tr> <tr> <td>2</td> <td>Not likely</td> </tr> <tr> <td>3</td> <td>Somewhat likely</td> </tr> <tr> <td>4</td> <td>Likely</td> </tr> <tr> <td>5</td> <td>Very likely</td> </tr> </tbody> </table>                                                                                                                                                                                                                                                                                                                                                                                                                                                                                                                                                                                                                                                                                                                         | radio           |  | 1 | Not at all likely                                                  | 2 | Not likely                                                      | 3 | Somewhat likely                                   | 4 | Likely                                                                                    | 5 | Very likely                                                   |   |                                                                    |   |                                                                                     |   |                                                                                                                    |   |                                   |
| radio           |                                                                                                                    |                                                                                                                                                                                                                                         |                                                                                                                                                                                                                                                                                                                                                                                                                                                                                                                                                                                                                                                                                                                                                                                                                                                                                                                                                                                                                                                        |                 |  |   |                                                                    |   |                                                                 |   |                                                   |   |                                                                                           |   |                                                               |   |                                                                    |   |                                                                                     |   |                                                                                                                    |   |                                   |
| 1               | Not at all likely                                                                                                  |                                                                                                                                                                                                                                         |                                                                                                                                                                                                                                                                                                                                                                                                                                                                                                                                                                                                                                                                                                                                                                                                                                                                                                                                                                                                                                                        |                 |  |   |                                                                    |   |                                                                 |   |                                                   |   |                                                                                           |   |                                                               |   |                                                                    |   |                                                                                     |   |                                                                                                                    |   |                                   |
| 2               | Not likely                                                                                                         |                                                                                                                                                                                                                                         |                                                                                                                                                                                                                                                                                                                                                                                                                                                                                                                                                                                                                                                                                                                                                                                                                                                                                                                                                                                                                                                        |                 |  |   |                                                                    |   |                                                                 |   |                                                   |   |                                                                                           |   |                                                               |   |                                                                    |   |                                                                                     |   |                                                                                                                    |   |                                   |
| 3               | Somewhat likely                                                                                                    |                                                                                                                                                                                                                                         |                                                                                                                                                                                                                                                                                                                                                                                                                                                                                                                                                                                                                                                                                                                                                                                                                                                                                                                                                                                                                                                        |                 |  |   |                                                                    |   |                                                                 |   |                                                   |   |                                                                                           |   |                                                               |   |                                                                    |   |                                                                                     |   |                                                                                                                    |   |                                   |
| 4               | Likely                                                                                                             |                                                                                                                                                                                                                                         |                                                                                                                                                                                                                                                                                                                                                                                                                                                                                                                                                                                                                                                                                                                                                                                                                                                                                                                                                                                                                                                        |                 |  |   |                                                                    |   |                                                                 |   |                                                   |   |                                                                                           |   |                                                               |   |                                                                    |   |                                                                                     |   |                                                                                                                    |   |                                   |
| 5               | Very likely                                                                                                        |                                                                                                                                                                                                                                         |                                                                                                                                                                                                                                                                                                                                                                                                                                                                                                                                                                                                                                                                                                                                                                                                                                                                                                                                                                                                                                                        |                 |  |   |                                                                    |   |                                                                 |   |                                                   |   |                                                                                           |   |                                                               |   |                                                                    |   |                                                                                     |   |                                                                                                                    |   |                                   |

|          |                                                                                                    |                                                                                                                  |                                                                                                                                                                                                                                                                                                                                                                                                                                                                                                                                                                                                                                                                                                                                                                                                                                                                                                                                                                                                                                                                                                                                                                                                                                                                                                                                                                                                                                                                                                                                                                                                                                                                                                                                                                                                                                                                                                                                                                                                                                                                                                                                                                                                                                                                                                                                                                                                                                                                                                                                                                                                                                                                                                                                                                                                                                                                                                                                                                                                                                                                                                                                                                                                                                                                                        |          |  |  |   |                              |                                         |   |                              |                                                       |   |                              |                       |   |                              |                                       |   |                              |                                       |   |                              |                                         |   |                             |                           |   |                             |                                   |   |                             |                                        |    |                              |                                   |    |                              |                                                  |    |                              |                                                                                 |    |                              |                                                |    |                              |                                                                         |    |                              |        |
|----------|----------------------------------------------------------------------------------------------------|------------------------------------------------------------------------------------------------------------------|----------------------------------------------------------------------------------------------------------------------------------------------------------------------------------------------------------------------------------------------------------------------------------------------------------------------------------------------------------------------------------------------------------------------------------------------------------------------------------------------------------------------------------------------------------------------------------------------------------------------------------------------------------------------------------------------------------------------------------------------------------------------------------------------------------------------------------------------------------------------------------------------------------------------------------------------------------------------------------------------------------------------------------------------------------------------------------------------------------------------------------------------------------------------------------------------------------------------------------------------------------------------------------------------------------------------------------------------------------------------------------------------------------------------------------------------------------------------------------------------------------------------------------------------------------------------------------------------------------------------------------------------------------------------------------------------------------------------------------------------------------------------------------------------------------------------------------------------------------------------------------------------------------------------------------------------------------------------------------------------------------------------------------------------------------------------------------------------------------------------------------------------------------------------------------------------------------------------------------------------------------------------------------------------------------------------------------------------------------------------------------------------------------------------------------------------------------------------------------------------------------------------------------------------------------------------------------------------------------------------------------------------------------------------------------------------------------------------------------------------------------------------------------------------------------------------------------------------------------------------------------------------------------------------------------------------------------------------------------------------------------------------------------------------------------------------------------------------------------------------------------------------------------------------------------------------------------------------------------------------------------------------------------------|----------|--|--|---|------------------------------|-----------------------------------------|---|------------------------------|-------------------------------------------------------|---|------------------------------|-----------------------|---|------------------------------|---------------------------------------|---|------------------------------|---------------------------------------|---|------------------------------|-----------------------------------------|---|-----------------------------|---------------------------|---|-----------------------------|-----------------------------------|---|-----------------------------|----------------------------------------|----|------------------------------|-----------------------------------|----|------------------------------|--------------------------------------------------|----|------------------------------|---------------------------------------------------------------------------------|----|------------------------------|------------------------------------------------|----|------------------------------|-------------------------------------------------------------------------|----|------------------------------|--------|
| 70       | covid_kids_ab_reasons_yes<br>Show the field ONLY if:<br>[covid_caregiver] = '1'                    | What are some reasons you WOULD be willing to get THE CHILD(REN) IN YOUR CARE tested? (check all that apply)     | <table border="1"> <tr> <td colspan="3" data-bbox="1044 88 1537 109">checkbox</td> </tr> <tr> <td data-bbox="1044 109 1076 201">1</td> <td data-bbox="1076 109 1369 201">covid_kids_ab_reasons_yes__1</td> <td data-bbox="1369 109 1537 201">I would want to know for their health</td> </tr> <tr> <td data-bbox="1044 201 1076 317">2</td> <td data-bbox="1076 201 1369 317">covid_kids_ab_reasons_yes__2</td> <td data-bbox="1369 201 1537 317">I would want to know so they don't transmit to others</td> </tr> <tr> <td data-bbox="1044 317 1076 359">3</td> <td data-bbox="1076 317 1369 359">covid_kids_ab_reasons_yes__3</td> <td data-bbox="1369 317 1537 359">It is free</td> </tr> <tr> <td data-bbox="1044 359 1076 422">4</td> <td data-bbox="1076 359 1369 422">covid_kids_ab_reasons_yes__4</td> <td data-bbox="1369 359 1537 422">It does not take much effort</td> </tr> <tr> <td data-bbox="1044 422 1076 485">5</td> <td data-bbox="1076 422 1369 485">covid_kids_ab_reasons_yes__5</td> <td data-bbox="1369 422 1537 485">It is required for school</td> </tr> <tr> <td data-bbox="1044 485 1076 527">6</td> <td data-bbox="1076 485 1369 527">covid_kids_ab_reasons_yes__6</td> <td data-bbox="1369 485 1537 527">Other:</td> </tr> </table>                                                                                                                                                                                                                                                                                                                                                                                                                                                                                                                                                                                                                                                                                                                                                                                                                                                                                                                                                                                                                                                                                                                                                                                                                                                                                                                                                                                                                                                                                                                                                                                                                                                                                                                                                                                                                                                                                                                                                                                                                       | checkbox |  |  | 1 | covid_kids_ab_reasons_yes__1 | I would want to know for their health   | 2 | covid_kids_ab_reasons_yes__2 | I would want to know so they don't transmit to others | 3 | covid_kids_ab_reasons_yes__3 | It is free            | 4 | covid_kids_ab_reasons_yes__4 | It does not take much effort          | 5 | covid_kids_ab_reasons_yes__5 | It is required for school             | 6 | covid_kids_ab_reasons_yes__6 | Other:                                  |   |                             |                           |   |                             |                                   |   |                             |                                        |    |                              |                                   |    |                              |                                                  |    |                              |                                                                                 |    |                              |                                                |    |                              |                                                                         |    |                              |        |
| checkbox |                                                                                                    |                                                                                                                  |                                                                                                                                                                                                                                                                                                                                                                                                                                                                                                                                                                                                                                                                                                                                                                                                                                                                                                                                                                                                                                                                                                                                                                                                                                                                                                                                                                                                                                                                                                                                                                                                                                                                                                                                                                                                                                                                                                                                                                                                                                                                                                                                                                                                                                                                                                                                                                                                                                                                                                                                                                                                                                                                                                                                                                                                                                                                                                                                                                                                                                                                                                                                                                                                                                                                                        |          |  |  |   |                              |                                         |   |                              |                                                       |   |                              |                       |   |                              |                                       |   |                              |                                       |   |                              |                                         |   |                             |                           |   |                             |                                   |   |                             |                                        |    |                              |                                   |    |                              |                                                  |    |                              |                                                                                 |    |                              |                                                |    |                              |                                                                         |    |                              |        |
| 1        | covid_kids_ab_reasons_yes__1                                                                       | I would want to know for their health                                                                            |                                                                                                                                                                                                                                                                                                                                                                                                                                                                                                                                                                                                                                                                                                                                                                                                                                                                                                                                                                                                                                                                                                                                                                                                                                                                                                                                                                                                                                                                                                                                                                                                                                                                                                                                                                                                                                                                                                                                                                                                                                                                                                                                                                                                                                                                                                                                                                                                                                                                                                                                                                                                                                                                                                                                                                                                                                                                                                                                                                                                                                                                                                                                                                                                                                                                                        |          |  |  |   |                              |                                         |   |                              |                                                       |   |                              |                       |   |                              |                                       |   |                              |                                       |   |                              |                                         |   |                             |                           |   |                             |                                   |   |                             |                                        |    |                              |                                   |    |                              |                                                  |    |                              |                                                                                 |    |                              |                                                |    |                              |                                                                         |    |                              |        |
| 2        | covid_kids_ab_reasons_yes__2                                                                       | I would want to know so they don't transmit to others                                                            |                                                                                                                                                                                                                                                                                                                                                                                                                                                                                                                                                                                                                                                                                                                                                                                                                                                                                                                                                                                                                                                                                                                                                                                                                                                                                                                                                                                                                                                                                                                                                                                                                                                                                                                                                                                                                                                                                                                                                                                                                                                                                                                                                                                                                                                                                                                                                                                                                                                                                                                                                                                                                                                                                                                                                                                                                                                                                                                                                                                                                                                                                                                                                                                                                                                                                        |          |  |  |   |                              |                                         |   |                              |                                                       |   |                              |                       |   |                              |                                       |   |                              |                                       |   |                              |                                         |   |                             |                           |   |                             |                                   |   |                             |                                        |    |                              |                                   |    |                              |                                                  |    |                              |                                                                                 |    |                              |                                                |    |                              |                                                                         |    |                              |        |
| 3        | covid_kids_ab_reasons_yes__3                                                                       | It is free                                                                                                       |                                                                                                                                                                                                                                                                                                                                                                                                                                                                                                                                                                                                                                                                                                                                                                                                                                                                                                                                                                                                                                                                                                                                                                                                                                                                                                                                                                                                                                                                                                                                                                                                                                                                                                                                                                                                                                                                                                                                                                                                                                                                                                                                                                                                                                                                                                                                                                                                                                                                                                                                                                                                                                                                                                                                                                                                                                                                                                                                                                                                                                                                                                                                                                                                                                                                                        |          |  |  |   |                              |                                         |   |                              |                                                       |   |                              |                       |   |                              |                                       |   |                              |                                       |   |                              |                                         |   |                             |                           |   |                             |                                   |   |                             |                                        |    |                              |                                   |    |                              |                                                  |    |                              |                                                                                 |    |                              |                                                |    |                              |                                                                         |    |                              |        |
| 4        | covid_kids_ab_reasons_yes__4                                                                       | It does not take much effort                                                                                     |                                                                                                                                                                                                                                                                                                                                                                                                                                                                                                                                                                                                                                                                                                                                                                                                                                                                                                                                                                                                                                                                                                                                                                                                                                                                                                                                                                                                                                                                                                                                                                                                                                                                                                                                                                                                                                                                                                                                                                                                                                                                                                                                                                                                                                                                                                                                                                                                                                                                                                                                                                                                                                                                                                                                                                                                                                                                                                                                                                                                                                                                                                                                                                                                                                                                                        |          |  |  |   |                              |                                         |   |                              |                                                       |   |                              |                       |   |                              |                                       |   |                              |                                       |   |                              |                                         |   |                             |                           |   |                             |                                   |   |                             |                                        |    |                              |                                   |    |                              |                                                  |    |                              |                                                                                 |    |                              |                                                |    |                              |                                                                         |    |                              |        |
| 5        | covid_kids_ab_reasons_yes__5                                                                       | It is required for school                                                                                        |                                                                                                                                                                                                                                                                                                                                                                                                                                                                                                                                                                                                                                                                                                                                                                                                                                                                                                                                                                                                                                                                                                                                                                                                                                                                                                                                                                                                                                                                                                                                                                                                                                                                                                                                                                                                                                                                                                                                                                                                                                                                                                                                                                                                                                                                                                                                                                                                                                                                                                                                                                                                                                                                                                                                                                                                                                                                                                                                                                                                                                                                                                                                                                                                                                                                                        |          |  |  |   |                              |                                         |   |                              |                                                       |   |                              |                       |   |                              |                                       |   |                              |                                       |   |                              |                                         |   |                             |                           |   |                             |                                   |   |                             |                                        |    |                              |                                   |    |                              |                                                  |    |                              |                                                                                 |    |                              |                                                |    |                              |                                                                         |    |                              |        |
| 6        | covid_kids_ab_reasons_yes__6                                                                       | Other:                                                                                                           |                                                                                                                                                                                                                                                                                                                                                                                                                                                                                                                                                                                                                                                                                                                                                                                                                                                                                                                                                                                                                                                                                                                                                                                                                                                                                                                                                                                                                                                                                                                                                                                                                                                                                                                                                                                                                                                                                                                                                                                                                                                                                                                                                                                                                                                                                                                                                                                                                                                                                                                                                                                                                                                                                                                                                                                                                                                                                                                                                                                                                                                                                                                                                                                                                                                                                        |          |  |  |   |                              |                                         |   |                              |                                                       |   |                              |                       |   |                              |                                       |   |                              |                                       |   |                              |                                         |   |                             |                           |   |                             |                                   |   |                             |                                        |    |                              |                                   |    |                              |                                                  |    |                              |                                                                                 |    |                              |                                                |    |                              |                                                                         |    |                              |        |
| 71       | covid_kids_ab_reasons_yes_other<br>Show the field ONLY if:<br>[covid_kids_ab_reasons_yes(6)] = '1' | Other (please specify):                                                                                          | text                                                                                                                                                                                                                                                                                                                                                                                                                                                                                                                                                                                                                                                                                                                                                                                                                                                                                                                                                                                                                                                                                                                                                                                                                                                                                                                                                                                                                                                                                                                                                                                                                                                                                                                                                                                                                                                                                                                                                                                                                                                                                                                                                                                                                                                                                                                                                                                                                                                                                                                                                                                                                                                                                                                                                                                                                                                                                                                                                                                                                                                                                                                                                                                                                                                                                   |          |  |  |   |                              |                                         |   |                              |                                                       |   |                              |                       |   |                              |                                       |   |                              |                                       |   |                              |                                         |   |                             |                           |   |                             |                                   |   |                             |                                        |    |                              |                                   |    |                              |                                                  |    |                              |                                                                                 |    |                              |                                                |    |                              |                                                                         |    |                              |        |
| 72       | covid_kids_ab_reasons_no<br>Show the field ONLY if:<br>[covid_caregiver] = '1'                     | What are some reasons you WOULD NOT be willing to get THE CHILD(REN) IN YOUR CARE tested? (check all that apply) | <table border="1"> <tr> <td colspan="3" data-bbox="1044 699 1537 720">checkbox</td> </tr> <tr> <td data-bbox="1044 720 1076 793">1</td> <td data-bbox="1076 720 1369 793">covid_kids_ab_reasons_no__1</td> <td data-bbox="1369 720 1537 793">I am concerned the test will be painful</td> </tr> <tr> <td data-bbox="1044 793 1076 877">2</td> <td data-bbox="1076 793 1369 877">covid_kids_ab_reasons_no__2</td> <td data-bbox="1369 793 1537 877">I am concerned about the costs of the test</td> </tr> <tr> <td data-bbox="1044 877 1076 951">3</td> <td data-bbox="1076 877 1369 951">covid_kids_ab_reasons_no__3</td> <td data-bbox="1369 877 1537 951">I do not want to know</td> </tr> <tr> <td data-bbox="1044 951 1076 1014">4</td> <td data-bbox="1076 951 1369 1014">covid_kids_ab_reasons_no__4</td> <td data-bbox="1369 951 1537 1014">I do not think they have been exposed</td> </tr> <tr> <td data-bbox="1044 1014 1076 1077">5</td> <td data-bbox="1076 1014 1369 1077">covid_kids_ab_reasons_no__5</td> <td data-bbox="1369 1014 1537 1077">I do not think they have had symptoms</td> </tr> <tr> <td data-bbox="1044 1077 1076 1140">6</td> <td data-bbox="1076 1077 1369 1140">covid_kids_ab_reasons_no__6</td> <td data-bbox="1369 1077 1537 1140">I do not trust the accuracy of the test</td> </tr> <tr> <td data-bbox="1044 1140 1076 1203">7</td> <td data-bbox="1076 1140 1369 1203">covid_kids_ab_reasons_no__7</td> <td data-bbox="1369 1140 1537 1203">They already had COVID-19</td> </tr> <tr> <td data-bbox="1044 1203 1076 1266">8</td> <td data-bbox="1076 1203 1369 1266">covid_kids_ab_reasons_no__8</td> <td data-bbox="1369 1203 1537 1266">I am not concerned about COVID-19</td> </tr> <tr> <td data-bbox="1044 1266 1076 1329">9</td> <td data-bbox="1076 1266 1369 1329">covid_kids_ab_reasons_no__9</td> <td data-bbox="1369 1266 1537 1329">I do not have access to transportation</td> </tr> <tr> <td data-bbox="1044 1329 1076 1392">15</td> <td data-bbox="1076 1329 1369 1392">covid_kids_ab_reasons_no__15</td> <td data-bbox="1369 1329 1537 1392">I do not have access to childcare</td> </tr> <tr> <td data-bbox="1044 1392 1076 1486">10</td> <td data-bbox="1076 1392 1369 1486">covid_kids_ab_reasons_no__10</td> <td data-bbox="1369 1392 1537 1486">I have to work, and am unable to get off of work</td> </tr> <tr> <td data-bbox="1044 1486 1076 1602">11</td> <td data-bbox="1076 1486 1369 1602">covid_kids_ab_reasons_no__11</td> <td data-bbox="1369 1486 1537 1602">I am concerned about the possibility of becoming infected when going for a test</td> </tr> <tr> <td data-bbox="1044 1602 1076 1696">12</td> <td data-bbox="1076 1602 1369 1696">covid_kids_ab_reasons_no__12</td> <td data-bbox="1369 1602 1537 1696">If they tested positive, people might judge me</td> </tr> <tr> <td data-bbox="1044 1696 1076 1812">13</td> <td data-bbox="1076 1696 1369 1812">covid_kids_ab_reasons_no__13</td> <td data-bbox="1369 1696 1537 1812">If they tested positive, I would have to keep them isolated/quarantined</td> </tr> <tr> <td data-bbox="1044 1812 1076 1854">14</td> <td data-bbox="1076 1812 1369 1854">covid_kids_ab_reasons_no__14</td> <td data-bbox="1369 1812 1537 1854">Other:</td> </tr> </table> | checkbox |  |  | 1 | covid_kids_ab_reasons_no__1  | I am concerned the test will be painful | 2 | covid_kids_ab_reasons_no__2  | I am concerned about the costs of the test            | 3 | covid_kids_ab_reasons_no__3  | I do not want to know | 4 | covid_kids_ab_reasons_no__4  | I do not think they have been exposed | 5 | covid_kids_ab_reasons_no__5  | I do not think they have had symptoms | 6 | covid_kids_ab_reasons_no__6  | I do not trust the accuracy of the test | 7 | covid_kids_ab_reasons_no__7 | They already had COVID-19 | 8 | covid_kids_ab_reasons_no__8 | I am not concerned about COVID-19 | 9 | covid_kids_ab_reasons_no__9 | I do not have access to transportation | 15 | covid_kids_ab_reasons_no__15 | I do not have access to childcare | 10 | covid_kids_ab_reasons_no__10 | I have to work, and am unable to get off of work | 11 | covid_kids_ab_reasons_no__11 | I am concerned about the possibility of becoming infected when going for a test | 12 | covid_kids_ab_reasons_no__12 | If they tested positive, people might judge me | 13 | covid_kids_ab_reasons_no__13 | If they tested positive, I would have to keep them isolated/quarantined | 14 | covid_kids_ab_reasons_no__14 | Other: |
| checkbox |                                                                                                    |                                                                                                                  |                                                                                                                                                                                                                                                                                                                                                                                                                                                                                                                                                                                                                                                                                                                                                                                                                                                                                                                                                                                                                                                                                                                                                                                                                                                                                                                                                                                                                                                                                                                                                                                                                                                                                                                                                                                                                                                                                                                                                                                                                                                                                                                                                                                                                                                                                                                                                                                                                                                                                                                                                                                                                                                                                                                                                                                                                                                                                                                                                                                                                                                                                                                                                                                                                                                                                        |          |  |  |   |                              |                                         |   |                              |                                                       |   |                              |                       |   |                              |                                       |   |                              |                                       |   |                              |                                         |   |                             |                           |   |                             |                                   |   |                             |                                        |    |                              |                                   |    |                              |                                                  |    |                              |                                                                                 |    |                              |                                                |    |                              |                                                                         |    |                              |        |
| 1        | covid_kids_ab_reasons_no__1                                                                        | I am concerned the test will be painful                                                                          |                                                                                                                                                                                                                                                                                                                                                                                                                                                                                                                                                                                                                                                                                                                                                                                                                                                                                                                                                                                                                                                                                                                                                                                                                                                                                                                                                                                                                                                                                                                                                                                                                                                                                                                                                                                                                                                                                                                                                                                                                                                                                                                                                                                                                                                                                                                                                                                                                                                                                                                                                                                                                                                                                                                                                                                                                                                                                                                                                                                                                                                                                                                                                                                                                                                                                        |          |  |  |   |                              |                                         |   |                              |                                                       |   |                              |                       |   |                              |                                       |   |                              |                                       |   |                              |                                         |   |                             |                           |   |                             |                                   |   |                             |                                        |    |                              |                                   |    |                              |                                                  |    |                              |                                                                                 |    |                              |                                                |    |                              |                                                                         |    |                              |        |
| 2        | covid_kids_ab_reasons_no__2                                                                        | I am concerned about the costs of the test                                                                       |                                                                                                                                                                                                                                                                                                                                                                                                                                                                                                                                                                                                                                                                                                                                                                                                                                                                                                                                                                                                                                                                                                                                                                                                                                                                                                                                                                                                                                                                                                                                                                                                                                                                                                                                                                                                                                                                                                                                                                                                                                                                                                                                                                                                                                                                                                                                                                                                                                                                                                                                                                                                                                                                                                                                                                                                                                                                                                                                                                                                                                                                                                                                                                                                                                                                                        |          |  |  |   |                              |                                         |   |                              |                                                       |   |                              |                       |   |                              |                                       |   |                              |                                       |   |                              |                                         |   |                             |                           |   |                             |                                   |   |                             |                                        |    |                              |                                   |    |                              |                                                  |    |                              |                                                                                 |    |                              |                                                |    |                              |                                                                         |    |                              |        |
| 3        | covid_kids_ab_reasons_no__3                                                                        | I do not want to know                                                                                            |                                                                                                                                                                                                                                                                                                                                                                                                                                                                                                                                                                                                                                                                                                                                                                                                                                                                                                                                                                                                                                                                                                                                                                                                                                                                                                                                                                                                                                                                                                                                                                                                                                                                                                                                                                                                                                                                                                                                                                                                                                                                                                                                                                                                                                                                                                                                                                                                                                                                                                                                                                                                                                                                                                                                                                                                                                                                                                                                                                                                                                                                                                                                                                                                                                                                                        |          |  |  |   |                              |                                         |   |                              |                                                       |   |                              |                       |   |                              |                                       |   |                              |                                       |   |                              |                                         |   |                             |                           |   |                             |                                   |   |                             |                                        |    |                              |                                   |    |                              |                                                  |    |                              |                                                                                 |    |                              |                                                |    |                              |                                                                         |    |                              |        |
| 4        | covid_kids_ab_reasons_no__4                                                                        | I do not think they have been exposed                                                                            |                                                                                                                                                                                                                                                                                                                                                                                                                                                                                                                                                                                                                                                                                                                                                                                                                                                                                                                                                                                                                                                                                                                                                                                                                                                                                                                                                                                                                                                                                                                                                                                                                                                                                                                                                                                                                                                                                                                                                                                                                                                                                                                                                                                                                                                                                                                                                                                                                                                                                                                                                                                                                                                                                                                                                                                                                                                                                                                                                                                                                                                                                                                                                                                                                                                                                        |          |  |  |   |                              |                                         |   |                              |                                                       |   |                              |                       |   |                              |                                       |   |                              |                                       |   |                              |                                         |   |                             |                           |   |                             |                                   |   |                             |                                        |    |                              |                                   |    |                              |                                                  |    |                              |                                                                                 |    |                              |                                                |    |                              |                                                                         |    |                              |        |
| 5        | covid_kids_ab_reasons_no__5                                                                        | I do not think they have had symptoms                                                                            |                                                                                                                                                                                                                                                                                                                                                                                                                                                                                                                                                                                                                                                                                                                                                                                                                                                                                                                                                                                                                                                                                                                                                                                                                                                                                                                                                                                                                                                                                                                                                                                                                                                                                                                                                                                                                                                                                                                                                                                                                                                                                                                                                                                                                                                                                                                                                                                                                                                                                                                                                                                                                                                                                                                                                                                                                                                                                                                                                                                                                                                                                                                                                                                                                                                                                        |          |  |  |   |                              |                                         |   |                              |                                                       |   |                              |                       |   |                              |                                       |   |                              |                                       |   |                              |                                         |   |                             |                           |   |                             |                                   |   |                             |                                        |    |                              |                                   |    |                              |                                                  |    |                              |                                                                                 |    |                              |                                                |    |                              |                                                                         |    |                              |        |
| 6        | covid_kids_ab_reasons_no__6                                                                        | I do not trust the accuracy of the test                                                                          |                                                                                                                                                                                                                                                                                                                                                                                                                                                                                                                                                                                                                                                                                                                                                                                                                                                                                                                                                                                                                                                                                                                                                                                                                                                                                                                                                                                                                                                                                                                                                                                                                                                                                                                                                                                                                                                                                                                                                                                                                                                                                                                                                                                                                                                                                                                                                                                                                                                                                                                                                                                                                                                                                                                                                                                                                                                                                                                                                                                                                                                                                                                                                                                                                                                                                        |          |  |  |   |                              |                                         |   |                              |                                                       |   |                              |                       |   |                              |                                       |   |                              |                                       |   |                              |                                         |   |                             |                           |   |                             |                                   |   |                             |                                        |    |                              |                                   |    |                              |                                                  |    |                              |                                                                                 |    |                              |                                                |    |                              |                                                                         |    |                              |        |
| 7        | covid_kids_ab_reasons_no__7                                                                        | They already had COVID-19                                                                                        |                                                                                                                                                                                                                                                                                                                                                                                                                                                                                                                                                                                                                                                                                                                                                                                                                                                                                                                                                                                                                                                                                                                                                                                                                                                                                                                                                                                                                                                                                                                                                                                                                                                                                                                                                                                                                                                                                                                                                                                                                                                                                                                                                                                                                                                                                                                                                                                                                                                                                                                                                                                                                                                                                                                                                                                                                                                                                                                                                                                                                                                                                                                                                                                                                                                                                        |          |  |  |   |                              |                                         |   |                              |                                                       |   |                              |                       |   |                              |                                       |   |                              |                                       |   |                              |                                         |   |                             |                           |   |                             |                                   |   |                             |                                        |    |                              |                                   |    |                              |                                                  |    |                              |                                                                                 |    |                              |                                                |    |                              |                                                                         |    |                              |        |
| 8        | covid_kids_ab_reasons_no__8                                                                        | I am not concerned about COVID-19                                                                                |                                                                                                                                                                                                                                                                                                                                                                                                                                                                                                                                                                                                                                                                                                                                                                                                                                                                                                                                                                                                                                                                                                                                                                                                                                                                                                                                                                                                                                                                                                                                                                                                                                                                                                                                                                                                                                                                                                                                                                                                                                                                                                                                                                                                                                                                                                                                                                                                                                                                                                                                                                                                                                                                                                                                                                                                                                                                                                                                                                                                                                                                                                                                                                                                                                                                                        |          |  |  |   |                              |                                         |   |                              |                                                       |   |                              |                       |   |                              |                                       |   |                              |                                       |   |                              |                                         |   |                             |                           |   |                             |                                   |   |                             |                                        |    |                              |                                   |    |                              |                                                  |    |                              |                                                                                 |    |                              |                                                |    |                              |                                                                         |    |                              |        |
| 9        | covid_kids_ab_reasons_no__9                                                                        | I do not have access to transportation                                                                           |                                                                                                                                                                                                                                                                                                                                                                                                                                                                                                                                                                                                                                                                                                                                                                                                                                                                                                                                                                                                                                                                                                                                                                                                                                                                                                                                                                                                                                                                                                                                                                                                                                                                                                                                                                                                                                                                                                                                                                                                                                                                                                                                                                                                                                                                                                                                                                                                                                                                                                                                                                                                                                                                                                                                                                                                                                                                                                                                                                                                                                                                                                                                                                                                                                                                                        |          |  |  |   |                              |                                         |   |                              |                                                       |   |                              |                       |   |                              |                                       |   |                              |                                       |   |                              |                                         |   |                             |                           |   |                             |                                   |   |                             |                                        |    |                              |                                   |    |                              |                                                  |    |                              |                                                                                 |    |                              |                                                |    |                              |                                                                         |    |                              |        |
| 15       | covid_kids_ab_reasons_no__15                                                                       | I do not have access to childcare                                                                                |                                                                                                                                                                                                                                                                                                                                                                                                                                                                                                                                                                                                                                                                                                                                                                                                                                                                                                                                                                                                                                                                                                                                                                                                                                                                                                                                                                                                                                                                                                                                                                                                                                                                                                                                                                                                                                                                                                                                                                                                                                                                                                                                                                                                                                                                                                                                                                                                                                                                                                                                                                                                                                                                                                                                                                                                                                                                                                                                                                                                                                                                                                                                                                                                                                                                                        |          |  |  |   |                              |                                         |   |                              |                                                       |   |                              |                       |   |                              |                                       |   |                              |                                       |   |                              |                                         |   |                             |                           |   |                             |                                   |   |                             |                                        |    |                              |                                   |    |                              |                                                  |    |                              |                                                                                 |    |                              |                                                |    |                              |                                                                         |    |                              |        |
| 10       | covid_kids_ab_reasons_no__10                                                                       | I have to work, and am unable to get off of work                                                                 |                                                                                                                                                                                                                                                                                                                                                                                                                                                                                                                                                                                                                                                                                                                                                                                                                                                                                                                                                                                                                                                                                                                                                                                                                                                                                                                                                                                                                                                                                                                                                                                                                                                                                                                                                                                                                                                                                                                                                                                                                                                                                                                                                                                                                                                                                                                                                                                                                                                                                                                                                                                                                                                                                                                                                                                                                                                                                                                                                                                                                                                                                                                                                                                                                                                                                        |          |  |  |   |                              |                                         |   |                              |                                                       |   |                              |                       |   |                              |                                       |   |                              |                                       |   |                              |                                         |   |                             |                           |   |                             |                                   |   |                             |                                        |    |                              |                                   |    |                              |                                                  |    |                              |                                                                                 |    |                              |                                                |    |                              |                                                                         |    |                              |        |
| 11       | covid_kids_ab_reasons_no__11                                                                       | I am concerned about the possibility of becoming infected when going for a test                                  |                                                                                                                                                                                                                                                                                                                                                                                                                                                                                                                                                                                                                                                                                                                                                                                                                                                                                                                                                                                                                                                                                                                                                                                                                                                                                                                                                                                                                                                                                                                                                                                                                                                                                                                                                                                                                                                                                                                                                                                                                                                                                                                                                                                                                                                                                                                                                                                                                                                                                                                                                                                                                                                                                                                                                                                                                                                                                                                                                                                                                                                                                                                                                                                                                                                                                        |          |  |  |   |                              |                                         |   |                              |                                                       |   |                              |                       |   |                              |                                       |   |                              |                                       |   |                              |                                         |   |                             |                           |   |                             |                                   |   |                             |                                        |    |                              |                                   |    |                              |                                                  |    |                              |                                                                                 |    |                              |                                                |    |                              |                                                                         |    |                              |        |
| 12       | covid_kids_ab_reasons_no__12                                                                       | If they tested positive, people might judge me                                                                   |                                                                                                                                                                                                                                                                                                                                                                                                                                                                                                                                                                                                                                                                                                                                                                                                                                                                                                                                                                                                                                                                                                                                                                                                                                                                                                                                                                                                                                                                                                                                                                                                                                                                                                                                                                                                                                                                                                                                                                                                                                                                                                                                                                                                                                                                                                                                                                                                                                                                                                                                                                                                                                                                                                                                                                                                                                                                                                                                                                                                                                                                                                                                                                                                                                                                                        |          |  |  |   |                              |                                         |   |                              |                                                       |   |                              |                       |   |                              |                                       |   |                              |                                       |   |                              |                                         |   |                             |                           |   |                             |                                   |   |                             |                                        |    |                              |                                   |    |                              |                                                  |    |                              |                                                                                 |    |                              |                                                |    |                              |                                                                         |    |                              |        |
| 13       | covid_kids_ab_reasons_no__13                                                                       | If they tested positive, I would have to keep them isolated/quarantined                                          |                                                                                                                                                                                                                                                                                                                                                                                                                                                                                                                                                                                                                                                                                                                                                                                                                                                                                                                                                                                                                                                                                                                                                                                                                                                                                                                                                                                                                                                                                                                                                                                                                                                                                                                                                                                                                                                                                                                                                                                                                                                                                                                                                                                                                                                                                                                                                                                                                                                                                                                                                                                                                                                                                                                                                                                                                                                                                                                                                                                                                                                                                                                                                                                                                                                                                        |          |  |  |   |                              |                                         |   |                              |                                                       |   |                              |                       |   |                              |                                       |   |                              |                                       |   |                              |                                         |   |                             |                           |   |                             |                                   |   |                             |                                        |    |                              |                                   |    |                              |                                                  |    |                              |                                                                                 |    |                              |                                                |    |                              |                                                                         |    |                              |        |
| 14       | covid_kids_ab_reasons_no__14                                                                       | Other:                                                                                                           |                                                                                                                                                                                                                                                                                                                                                                                                                                                                                                                                                                                                                                                                                                                                                                                                                                                                                                                                                                                                                                                                                                                                                                                                                                                                                                                                                                                                                                                                                                                                                                                                                                                                                                                                                                                                                                                                                                                                                                                                                                                                                                                                                                                                                                                                                                                                                                                                                                                                                                                                                                                                                                                                                                                                                                                                                                                                                                                                                                                                                                                                                                                                                                                                                                                                                        |          |  |  |   |                              |                                         |   |                              |                                                       |   |                              |                       |   |                              |                                       |   |                              |                                       |   |                              |                                         |   |                             |                           |   |                             |                                   |   |                             |                                        |    |                              |                                   |    |                              |                                                  |    |                              |                                                                                 |    |                              |                                                |    |                              |                                                                         |    |                              |        |
| 73       | covid_kids_ab_reasons_no_other<br>Show the field ONLY if:<br>[covid_kids_ab_reasons_no(14)] = '1'  | Other (please specify):                                                                                          | text                                                                                                                                                                                                                                                                                                                                                                                                                                                                                                                                                                                                                                                                                                                                                                                                                                                                                                                                                                                                                                                                                                                                                                                                                                                                                                                                                                                                                                                                                                                                                                                                                                                                                                                                                                                                                                                                                                                                                                                                                                                                                                                                                                                                                                                                                                                                                                                                                                                                                                                                                                                                                                                                                                                                                                                                                                                                                                                                                                                                                                                                                                                                                                                                                                                                                   |          |  |  |   |                              |                                         |   |                              |                                                       |   |                              |                       |   |                              |                                       |   |                              |                                       |   |                              |                                         |   |                             |                           |   |                             |                                   |   |                             |                                        |    |                              |                                   |    |                              |                                                  |    |                              |                                                                                 |    |                              |                                                |    |                              |                                                                         |    |                              |        |

|    |                                                                                            |                                                                                                                                                                                                                                                         |                                                                                                                                                                                                                                                                                                                                                                                                                                                                                                                                                                                                                                                                                                                                                                                                                                                                                                                                                                                                                                                                                           |   |                           |                                                                   |                 |                           |                                      |   |                           |                        |             |                           |                                                                |   |                           |                                    |   |                           |                                         |   |                           |                                                          |   |                           |                                                                                         |   |                           |        |
|----|--------------------------------------------------------------------------------------------|---------------------------------------------------------------------------------------------------------------------------------------------------------------------------------------------------------------------------------------------------------|-------------------------------------------------------------------------------------------------------------------------------------------------------------------------------------------------------------------------------------------------------------------------------------------------------------------------------------------------------------------------------------------------------------------------------------------------------------------------------------------------------------------------------------------------------------------------------------------------------------------------------------------------------------------------------------------------------------------------------------------------------------------------------------------------------------------------------------------------------------------------------------------------------------------------------------------------------------------------------------------------------------------------------------------------------------------------------------------|---|---------------------------|-------------------------------------------------------------------|-----------------|---------------------------|--------------------------------------|---|---------------------------|------------------------|-------------|---------------------------|----------------------------------------------------------------|---|---------------------------|------------------------------------|---|---------------------------|-----------------------------------------|---|---------------------------|----------------------------------------------------------|---|---------------------------|-----------------------------------------------------------------------------------------|---|---------------------------|--------|
| 74 | covid_vaccine_kids_likely<br>Show the field ONLY if:<br>[covid_caregiver] = '1'            | If there was a vaccine that could prevent COVID-19 in the future, how likely would you be to get the vaccine FOR THE CHILD(REN) IN YOUR CARE?                                                                                                           | radio<br><table border="1"> <tr><td>1</td><td>Not at all likely</td></tr> <tr><td>2</td><td>A little likely</td></tr> <tr><td>3</td><td>Somewhat likely</td></tr> <tr><td>4</td><td>Likely</td></tr> <tr><td>5</td><td>Very likely</td></tr> <tr><td>6</td><td>There are no children in my care</td></tr> </table>                                                                                                                                                                                                                                                                                                                                                                                                                                                                                                                                                                                                                                                                                                                                                                        | 1 | Not at all likely         | 2                                                                 | A little likely | 3                         | Somewhat likely                      | 4 | Likely                    | 5                      | Very likely | 6                         | There are no children in my care                               |   |                           |                                    |   |                           |                                         |   |                           |                                                          |   |                           |                                                                                         |   |                           |        |
| 1  | Not at all likely                                                                          |                                                                                                                                                                                                                                                         |                                                                                                                                                                                                                                                                                                                                                                                                                                                                                                                                                                                                                                                                                                                                                                                                                                                                                                                                                                                                                                                                                           |   |                           |                                                                   |                 |                           |                                      |   |                           |                        |             |                           |                                                                |   |                           |                                    |   |                           |                                         |   |                           |                                                          |   |                           |                                                                                         |   |                           |        |
| 2  | A little likely                                                                            |                                                                                                                                                                                                                                                         |                                                                                                                                                                                                                                                                                                                                                                                                                                                                                                                                                                                                                                                                                                                                                                                                                                                                                                                                                                                                                                                                                           |   |                           |                                                                   |                 |                           |                                      |   |                           |                        |             |                           |                                                                |   |                           |                                    |   |                           |                                         |   |                           |                                                          |   |                           |                                                                                         |   |                           |        |
| 3  | Somewhat likely                                                                            |                                                                                                                                                                                                                                                         |                                                                                                                                                                                                                                                                                                                                                                                                                                                                                                                                                                                                                                                                                                                                                                                                                                                                                                                                                                                                                                                                                           |   |                           |                                                                   |                 |                           |                                      |   |                           |                        |             |                           |                                                                |   |                           |                                    |   |                           |                                         |   |                           |                                                          |   |                           |                                                                                         |   |                           |        |
| 4  | Likely                                                                                     |                                                                                                                                                                                                                                                         |                                                                                                                                                                                                                                                                                                                                                                                                                                                                                                                                                                                                                                                                                                                                                                                                                                                                                                                                                                                                                                                                                           |   |                           |                                                                   |                 |                           |                                      |   |                           |                        |             |                           |                                                                |   |                           |                                    |   |                           |                                         |   |                           |                                                          |   |                           |                                                                                         |   |                           |        |
| 5  | Very likely                                                                                |                                                                                                                                                                                                                                                         |                                                                                                                                                                                                                                                                                                                                                                                                                                                                                                                                                                                                                                                                                                                                                                                                                                                                                                                                                                                                                                                                                           |   |                           |                                                                   |                 |                           |                                      |   |                           |                        |             |                           |                                                                |   |                           |                                    |   |                           |                                         |   |                           |                                                          |   |                           |                                                                                         |   |                           |        |
| 6  | There are no children in my care                                                           |                                                                                                                                                                                                                                                         |                                                                                                                                                                                                                                                                                                                                                                                                                                                                                                                                                                                                                                                                                                                                                                                                                                                                                                                                                                                                                                                                                           |   |                           |                                                                   |                 |                           |                                      |   |                           |                        |             |                           |                                                                |   |                           |                                    |   |                           |                                         |   |                           |                                                          |   |                           |                                                                                         |   |                           |        |
| 75 | covid_vaccine_kids_not<br>Show the field ONLY if:<br>[covid_caregiver] = '1'               | What are some reason(s) you may NOT want the vaccine FOR THE CHILD(REN) IN YOUR CARE? (check all that apply)                                                                                                                                            | checkbox<br><table border="1"> <tr> <td>1</td> <td>covid_vaccine_kids_not__1</td> <td>I am not worried about the child(ren) in my care getting COVID-19</td> </tr> <tr> <td>2</td> <td>covid_vaccine_kids_not__2</td> <td>Vaccines are still questionably safe</td> </tr> <tr> <td>3</td> <td>covid_vaccine_kids_not__3</td> <td>Vaccines are expensive</td> </tr> <tr> <td>4</td> <td>covid_vaccine_kids_not__4</td> <td>There is not enough information about the vaccine for COVID-19</td> </tr> <tr> <td>5</td> <td>covid_vaccine_kids_not__5</td> <td>Already received too many vaccines</td> </tr> <tr> <td>6</td> <td>covid_vaccine_kids_not__6</td> <td>Vaccines can have negative side effects</td> </tr> <tr> <td>7</td> <td>covid_vaccine_kids_not__7</td> <td>Vaccines have needles, which can be painful and/or scary</td> </tr> <tr> <td>8</td> <td>covid_vaccine_kids_not__8</td> <td>Vaccines are part of a government program, and I am suspicious of the government agenda</td> </tr> <tr> <td>9</td> <td>covid_vaccine_kids_not__9</td> <td>Other:</td> </tr> </table> | 1 | covid_vaccine_kids_not__1 | I am not worried about the child(ren) in my care getting COVID-19 | 2               | covid_vaccine_kids_not__2 | Vaccines are still questionably safe | 3 | covid_vaccine_kids_not__3 | Vaccines are expensive | 4           | covid_vaccine_kids_not__4 | There is not enough information about the vaccine for COVID-19 | 5 | covid_vaccine_kids_not__5 | Already received too many vaccines | 6 | covid_vaccine_kids_not__6 | Vaccines can have negative side effects | 7 | covid_vaccine_kids_not__7 | Vaccines have needles, which can be painful and/or scary | 8 | covid_vaccine_kids_not__8 | Vaccines are part of a government program, and I am suspicious of the government agenda | 9 | covid_vaccine_kids_not__9 | Other: |
| 1  | covid_vaccine_kids_not__1                                                                  | I am not worried about the child(ren) in my care getting COVID-19                                                                                                                                                                                       |                                                                                                                                                                                                                                                                                                                                                                                                                                                                                                                                                                                                                                                                                                                                                                                                                                                                                                                                                                                                                                                                                           |   |                           |                                                                   |                 |                           |                                      |   |                           |                        |             |                           |                                                                |   |                           |                                    |   |                           |                                         |   |                           |                                                          |   |                           |                                                                                         |   |                           |        |
| 2  | covid_vaccine_kids_not__2                                                                  | Vaccines are still questionably safe                                                                                                                                                                                                                    |                                                                                                                                                                                                                                                                                                                                                                                                                                                                                                                                                                                                                                                                                                                                                                                                                                                                                                                                                                                                                                                                                           |   |                           |                                                                   |                 |                           |                                      |   |                           |                        |             |                           |                                                                |   |                           |                                    |   |                           |                                         |   |                           |                                                          |   |                           |                                                                                         |   |                           |        |
| 3  | covid_vaccine_kids_not__3                                                                  | Vaccines are expensive                                                                                                                                                                                                                                  |                                                                                                                                                                                                                                                                                                                                                                                                                                                                                                                                                                                                                                                                                                                                                                                                                                                                                                                                                                                                                                                                                           |   |                           |                                                                   |                 |                           |                                      |   |                           |                        |             |                           |                                                                |   |                           |                                    |   |                           |                                         |   |                           |                                                          |   |                           |                                                                                         |   |                           |        |
| 4  | covid_vaccine_kids_not__4                                                                  | There is not enough information about the vaccine for COVID-19                                                                                                                                                                                          |                                                                                                                                                                                                                                                                                                                                                                                                                                                                                                                                                                                                                                                                                                                                                                                                                                                                                                                                                                                                                                                                                           |   |                           |                                                                   |                 |                           |                                      |   |                           |                        |             |                           |                                                                |   |                           |                                    |   |                           |                                         |   |                           |                                                          |   |                           |                                                                                         |   |                           |        |
| 5  | covid_vaccine_kids_not__5                                                                  | Already received too many vaccines                                                                                                                                                                                                                      |                                                                                                                                                                                                                                                                                                                                                                                                                                                                                                                                                                                                                                                                                                                                                                                                                                                                                                                                                                                                                                                                                           |   |                           |                                                                   |                 |                           |                                      |   |                           |                        |             |                           |                                                                |   |                           |                                    |   |                           |                                         |   |                           |                                                          |   |                           |                                                                                         |   |                           |        |
| 6  | covid_vaccine_kids_not__6                                                                  | Vaccines can have negative side effects                                                                                                                                                                                                                 |                                                                                                                                                                                                                                                                                                                                                                                                                                                                                                                                                                                                                                                                                                                                                                                                                                                                                                                                                                                                                                                                                           |   |                           |                                                                   |                 |                           |                                      |   |                           |                        |             |                           |                                                                |   |                           |                                    |   |                           |                                         |   |                           |                                                          |   |                           |                                                                                         |   |                           |        |
| 7  | covid_vaccine_kids_not__7                                                                  | Vaccines have needles, which can be painful and/or scary                                                                                                                                                                                                |                                                                                                                                                                                                                                                                                                                                                                                                                                                                                                                                                                                                                                                                                                                                                                                                                                                                                                                                                                                                                                                                                           |   |                           |                                                                   |                 |                           |                                      |   |                           |                        |             |                           |                                                                |   |                           |                                    |   |                           |                                         |   |                           |                                                          |   |                           |                                                                                         |   |                           |        |
| 8  | covid_vaccine_kids_not__8                                                                  | Vaccines are part of a government program, and I am suspicious of the government agenda                                                                                                                                                                 |                                                                                                                                                                                                                                                                                                                                                                                                                                                                                                                                                                                                                                                                                                                                                                                                                                                                                                                                                                                                                                                                                           |   |                           |                                                                   |                 |                           |                                      |   |                           |                        |             |                           |                                                                |   |                           |                                    |   |                           |                                         |   |                           |                                                          |   |                           |                                                                                         |   |                           |        |
| 9  | covid_vaccine_kids_not__9                                                                  | Other:                                                                                                                                                                                                                                                  |                                                                                                                                                                                                                                                                                                                                                                                                                                                                                                                                                                                                                                                                                                                                                                                                                                                                                                                                                                                                                                                                                           |   |                           |                                                                   |                 |                           |                                      |   |                           |                        |             |                           |                                                                |   |                           |                                    |   |                           |                                         |   |                           |                                                          |   |                           |                                                                                         |   |                           |        |
| 76 | covid_vaccine_kids_not_oth<br>Show the field ONLY if:<br>[covid_vaccine_kids_not(9)] = '1' | Other (please specify):                                                                                                                                                                                                                                 | text                                                                                                                                                                                                                                                                                                                                                                                                                                                                                                                                                                                                                                                                                                                                                                                                                                                                                                                                                                                                                                                                                      |   |                           |                                                                   |                 |                           |                                      |   |                           |                        |             |                           |                                                                |   |                           |                                    |   |                           |                                         |   |                           |                                                          |   |                           |                                                                                         |   |                           |        |
| 77 | covid_comments                                                                             | Thank you for completing our survey. We hope that this information can be used to improve the health of Rhode Island. If you have additional other thoughts related to COVID-19, your health, and the health of your community, please share them here. | notes<br>Custom alignment: LV                                                                                                                                                                                                                                                                                                                                                                                                                                                                                                                                                                                                                                                                                                                                                                                                                                                                                                                                                                                                                                                             |   |                           |                                                                   |                 |                           |                                      |   |                           |                        |             |                           |                                                                |   |                           |                                    |   |                           |                                         |   |                           |                                                          |   |                           |                                                                                         |   |                           |        |
| 78 | covid19_testing_survey_complete                                                            | Section Header: <i>Form Status</i><br>Complete?                                                                                                                                                                                                         | dropdown<br><table border="1"> <tr><td>0</td><td>Incomplete</td></tr> <tr><td>1</td><td>Unverified</td></tr> <tr><td>2</td><td>Complete</td></tr> </table>                                                                                                                                                                                                                                                                                                                                                                                                                                                                                                                                                                                                                                                                                                                                                                                                                                                                                                                                | 0 | Incomplete                | 1                                                                 | Unverified      | 2                         | Complete                             |   |                           |                        |             |                           |                                                                |   |                           |                                    |   |                           |                                         |   |                           |                                                          |   |                           |                                                                                         |   |                           |        |
| 0  | Incomplete                                                                                 |                                                                                                                                                                                                                                                         |                                                                                                                                                                                                                                                                                                                                                                                                                                                                                                                                                                                                                                                                                                                                                                                                                                                                                                                                                                                                                                                                                           |   |                           |                                                                   |                 |                           |                                      |   |                           |                        |             |                           |                                                                |   |                           |                                    |   |                           |                                         |   |                           |                                                          |   |                           |                                                                                         |   |                           |        |
| 1  | Unverified                                                                                 |                                                                                                                                                                                                                                                         |                                                                                                                                                                                                                                                                                                                                                                                                                                                                                                                                                                                                                                                                                                                                                                                                                                                                                                                                                                                                                                                                                           |   |                           |                                                                   |                 |                           |                                      |   |                           |                        |             |                           |                                                                |   |                           |                                    |   |                           |                                         |   |                           |                                                          |   |                           |                                                                                         |   |                           |        |
| 2  | Complete                                                                                   |                                                                                                                                                                                                                                                         |                                                                                                                                                                                                                                                                                                                                                                                                                                                                                                                                                                                                                                                                                                                                                                                                                                                                                                                                                                                                                                                                                           |   |                           |                                                                   |                 |                           |                                      |   |                           |                        |             |                           |                                                                |   |                           |                                    |   |                           |                                         |   |                           |                                                          |   |                           |                                                                                         |   |                           |        |
